# Supplementary material for: Randomised, controlled, open label, multicentre clinical trial to explore safety and efficacy of hyperbaric oxygen for preventing ICU admission, morbidity and mortality in adult patients with COVID-19
Source: PubMed Central journal article supplement (PMC8260306; doi:10.1136/bmjopen-2020-046738), 2021-07-05
Supplement: bmjopen-2020-046738.draft_revisions.pdf [file bmjopen-2020-046738.draft_revisions.pdf]

# BMJ Open

BMJ Open is committed to open peer review. As part of this commitment we make the peer review history of every article we publish publicly available.

When an article is published we post the peer reviewers' comments and the authors' responses online. We also post the versions of the paper that were used during peer review. These are the versions that the peer review comments apply to.

The versions of the paper that follow are the versions that were submitted during the peer review process. They are not the versions of record or the final published versions. They should not be cited or distributed as the published version of this manuscript.

BMJ Open is an open access journal and the full, final, typeset and author-corrected version of record of the manuscript is available on our site with no access controls, subscription charges or pay-per-view fees (<http://bmjopen.bmj.com>).

If you have any questions on BMJ Open's open peer review process please email [info.bmjopen@bmj.com](mailto:info.bmjopen@bmj.com)

# BMJ Open

## A Randomized, Controlled, Open Label, Multicentre Clinical Trial to explore Safety and Efficacy of Hyperbaric Oxygen for preventing ICU admission, Morbidity and Mortality in Adult Patients With COVID-19

|                               |                                                                                                                                                                                                                                                                                                                                                                                                                                                                                                                                                                                                                                                                                                                                                                                                                                                                                                                                                                                                                                                                                                                                                                                                                                                                                                                                                                                                                                                                                                                                                                                                                                                                                                                                                                                       |
|-------------------------------|---------------------------------------------------------------------------------------------------------------------------------------------------------------------------------------------------------------------------------------------------------------------------------------------------------------------------------------------------------------------------------------------------------------------------------------------------------------------------------------------------------------------------------------------------------------------------------------------------------------------------------------------------------------------------------------------------------------------------------------------------------------------------------------------------------------------------------------------------------------------------------------------------------------------------------------------------------------------------------------------------------------------------------------------------------------------------------------------------------------------------------------------------------------------------------------------------------------------------------------------------------------------------------------------------------------------------------------------------------------------------------------------------------------------------------------------------------------------------------------------------------------------------------------------------------------------------------------------------------------------------------------------------------------------------------------------------------------------------------------------------------------------------------------|
| Journal:                      | <i>BMJ Open</i>                                                                                                                                                                                                                                                                                                                                                                                                                                                                                                                                                                                                                                                                                                                                                                                                                                                                                                                                                                                                                                                                                                                                                                                                                                                                                                                                                                                                                                                                                                                                                                                                                                                                                                                                                                       |
| Manuscript ID                 | bmjopen-2020-046738                                                                                                                                                                                                                                                                                                                                                                                                                                                                                                                                                                                                                                                                                                                                                                                                                                                                                                                                                                                                                                                                                                                                                                                                                                                                                                                                                                                                                                                                                                                                                                                                                                                                                                                                                                   |
| Article Type:                 | Protocol                                                                                                                                                                                                                                                                                                                                                                                                                                                                                                                                                                                                                                                                                                                                                                                                                                                                                                                                                                                                                                                                                                                                                                                                                                                                                                                                                                                                                                                                                                                                                                                                                                                                                                                                                                              |
| Date Submitted by the Author: | 10-Nov-2020                                                                                                                                                                                                                                                                                                                                                                                                                                                                                                                                                                                                                                                                                                                                                                                                                                                                                                                                                                                                                                                                                                                                                                                                                                                                                                                                                                                                                                                                                                                                                                                                                                                                                                                                                                           |
| Complete List of Authors:     | <p>Kjellberg, Anders; Karolinska Institutet, Physiology and Pharmacology; Karolinska University Hospital, Perioperative Medicine and Intensive Care</p> <p>Douglas, Johan; Blekinge Hospital Karlskrona, Department of Anaesthesia and Intensive Care</p> <p>Kraus, Michael; Bergmannsheil und Kinderklinik Buer GmbH, Klinik für Anästhesiologie und Intensivmedizin</p> <p>Pawlik, Michael; Caritas-Krankenhaus Sankt Josef Regensburg</p> <p>Oscarsson, Nicklas; University of Gothenburg Sahlgrenska Academy, Anesthesiology and Intensive Care</p> <p>Zheng, Xiaowei; Karolinska Institute, Department of Molecular Medicine and Surgery</p> <p>Bergman, Peter; Karolinska Institutet, Dept of Laboratory Medicine, Div of Clinical Microbiology</p> <p>Frånberg, Oskar; Blekinge Institute of Technology, Department of mathematics and natural science</p> <p>Kowalski, Jan; JK BIostatistics AB,</p> <p>Nyren, Sven; Karolinska University Hospital, Department of Radiology Solna; Karolinska Institute, Department of Molecular Medicine and Surgery</p> <p>Silvanus, Mårten; Blekinge Institute of Technology, TIMN; Swedish Armed Forces Diving and Naval Medicine Centre</p> <p>Skold, Magnus; Karolinska Institute, Respiratory Medicine; Karolinska University Hospital, Respiratory Medicine and Allergy</p> <p>Catrina, Sergiu; Karolinska Institute, Molecular Medicine and Surgery; Center for Diabetes, Academic Specialist Center, Stockholm,</p> <p>Rodriguez-Wallberg, Kenny; Karolinska Universitetssjukhuset, Department of Reproductive Medicine, Division of Gynecology and Reproduction; Karolinska Institutet, Department of Oncology-Pathology</p> <p>Lindholm, Peter; Karolinska Institute, Physiology and Pharmacology ; UCSD, Emergency Medicine</p> |
| Keywords:                     | COVID-19, INTENSIVE & CRITICAL CARE, Immunology < THORACIC MEDICINE                                                                                                                                                                                                                                                                                                                                                                                                                                                                                                                                                                                                                                                                                                                                                                                                                                                                                                                                                                                                                                                                                                                                                                                                                                                                                                                                                                                                                                                                                                                                                                                                                                                                                                                   |
|                               |                                                                                                                                                                                                                                                                                                                                                                                                                                                                                                                                                                                                                                                                                                                                                                                                                                                                                                                                                                                                                                                                                                                                                                                                                                                                                                                                                                                                                                                                                                                                                                                                                                                                                                                                                                                       |

1  
2  
3  
4  
5  
6  
7  
8  
9  
10  
11  
12  
13  
14  
15  
16  
17  
18  
19  
20  
21  
22  
23  
24  
25  
26  
27  
28  
29  
30  
31  
32  
33  
34  
35  
36  
37  
38  
39  
40  
41  
42  
43  
44  
45  
46  
47  
48  
49  
50  
51  
52  
53  
54  
55  
56  
57  
58  
59  
60

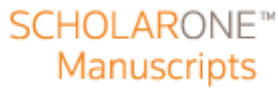

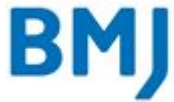

I, the Submitting Author has the right to grant and does grant on behalf of all authors of the Work (as defined in the below author licence), an exclusive licence and/or a non-exclusive licence for contributions from authors who are: i) UK Crown employees; ii) where BMJ has agreed a CC-BY licence shall apply, and/or iii) in accordance with the terms applicable for US Federal Government officers or employees acting as part of their official duties; on a worldwide, perpetual, irrevocable, royalty-free basis to BMJ Publishing Group Ltd ("BMJ") its licensees and where the relevant Journal is co-owned by BMJ to the co-owners of the Journal, to publish the Work in this journal and any other BMJ products and to exploit all rights, as set out in our [licence](#).

The Submitting Author accepts and understands that any supply made under these terms is made by BMJ to the Submitting Author unless you are acting as an employee on behalf of your employer or a postgraduate student of an affiliated institution which is paying any applicable article publishing charge ("APC") for Open Access articles. Where the Submitting Author wishes to make the Work available on an Open Access basis (and intends to pay the relevant APC), the terms of reuse of such Open Access shall be governed by a Creative Commons licence – details of these licences and which [Creative Commons](#) licence will apply to this Work are set out in our licence referred to above.

Other than as permitted in any relevant BMJ Author's Self Archiving Policies, I confirm this Work has not been accepted for publication elsewhere, is not being considered for publication elsewhere and does not duplicate material already published. I confirm all authors consent to publication of this Work and authorise the granting of this licence.

1  
2  
3 **1 COVID-19-HBO PROTOCOL**

4  
5  
6 **2 A Randomized, Controlled, Open Label, Multicentre Clinical Trial to explore Safety and**  
7 **3 Efficacy of Hyperbaric Oxygen for preventing ICU admission, Morbidity and Mortality in**  
8 **4 Adult Patients With COVID-19**  
9 **5**

10  
11 6 Anders Kjellberg MD<sup>1,2</sup>, Johan Douglas MD<sup>3</sup>, Michael Kraus MD, PhD<sup>4</sup>, Michael T. Pawlik MD,  
12 7 PhD<sup>5</sup>, Nicklas Oscarsson MD, PhD<sup>6</sup>, XiaoWei Zheng MD, PhD<sup>7</sup>, Peter Bergman MD, PhD<sup>8,9</sup>,  
13 8 Oskar Frånberg PhD<sup>10</sup>, Jan Kowalski<sup>11</sup>, Sven Nyrén MD, PhD<sup>7,12</sup>, Mårten Silvanus MSc<sup>10,13</sup>,  
14 9 Magnus Sköld MD, PhD<sup>14,15</sup>, Sergiu-Bogdan Catrina MD, PhD<sup>7,16</sup>, Kenny A. Rodriguez-  
15 10 Wallberg MD, PhD<sup>\*17,18</sup> and Peter Lindholm MD, PhD<sup>\*1,19</sup>

16  
17  
18  
19 11 \*= shared senior authorship.

- 20  
21  
22 13 1) Dept of Physiology and Pharmacology, Karolinska Institutet, Stockholm, Sweden.  
23 14 2) Perioperative Medicine and Intensive Care Medicine, Karolinska University Hospital,  
24 15 Stockholm, Sweden  
25 16 3) Dept of Anaesthesia and Intensive Care, Blekingesjukhuset, Karlskrona, Sweden  
26 17 4) Klinik für Anästhesiologie und Intensivmedizin Bergmannsheil und Kinderklinik Buer  
27 18 GmbH 45894 Gelsenkirchen, Germany  
28 19 5) Dept of Anaesthesiology, St. Josef Hospital, 93053 Regensburg, Germany  
29 20 6) Dept of Anaesthesia and Intensive Care, Göteborgs universitet, Sahlgrenska  
30 21 Akademin, Göteborg, Sweden  
31 22 7) Dept of Molecular Medicine and Surgery, Karolinska Institutet, Stockholm, Sweden  
32 23 8) Dept of Laboratory Medicine, Karolinska Institutet, Stockholm, Sweden  
33 24 9) Dept of Infectious Diseases, Karolinska University Hospital, Stockholm, Sweden  
34 25 10) Dept of Mathematics and natural sciences, Blekinge Institute of Technology,  
35 26 Karlskrona, Sweden  
36 27 11) JK Statistics AB, Stockholm, Sweden  
37 28 12) Dept Radiology Solna, Karolinska University Hospital, Stockholm, Sweden  
38 29 13) Swedish Armed Forces Diving and Naval Medicine Centre, Karlskrona, Sweden  
39 30 14) Respiratory Medicine Unit, Department of Medicine Solna and Center for Molecular  
40 31 Medicine, Karolinska Institutet, Stockholm, Sweden  
41 32 15) Dept of Respiratory Medicine and Allergy, Karolinska University Hospital, Stockholm,  
42 33 Sweden  
43 34 16) Center for Diabetes, Academic Specialist Center, Stockholm, Sweden  
44 35 17) Dept of Oncology and Pathology, Karolinska Institutet, Stockholm, Sweden  
45 36 18) Dept of Reproductive Medicine, Division of Gynaecology and Reproduction,  
46 37 Karolinska University Hospital, Stockholm, Sweden  
47 38 19) Dept of Emergency Medicine, University of California San Diego, La Jolla, CA, 92093,  
48 39 USA.  
49  
50  
51  
52  
53  
54  
55  
56  
57

58 43 **Corresponding Author** Anders Kjellberg, [anders.kjellberg@ki.se](mailto:anders.kjellberg@ki.se) ORCID ID: 0000-0002-4819-  
59 44 1024

1  
2  
3 45 **ABSTRACT**  
4

5 46 **Introduction** Corona virus disease 2019 (COVID-19) may cause severe pneumonitis and  
6  
7 47 trigger a massive inflammatory response that requires ventilatory support. The intensive  
8  
9 48 care unit (ICU)-mortality has been reported to be as high as 62%. Dexamethasone is the only  
10  
11 49 of all anti-inflammatory drugs that have been tested to date that has shown a positive effect  
12  
13 50 on mortality. We aim to explore if treatment with hyperbaric oxygen (HBO) is safe and  
14  
15 51 effective for patients with moderately severe COVID-19. Our hypothesis is that HBO can  
16  
17 52 prevent ICU admission, morbidity and mortality by attenuating the inflammatory response.  
18  
19 53 The primary objective is to evaluate if HBO reduces the number of ICU admissions compared  
20  
21 54 to best practice treatment for COVID-19, main secondary objectives are to evaluate if HBO  
22  
23 55 reduces the load on ICU resources, morbidity and mortality and to evaluate if HBO mitigates  
24  
25 56 the inflammatory reaction in COVID-19.

26  
27 57 **Methods and Analysis** A randomised, controlled, phase II, open label, multicentre trial. 200  
28  
29 58 subjects with moderately severe COVID-19 and at least two risk factors for mortality will be  
30  
31 59 included. Baseline clinical data and blood samples will be collected before randomisation  
32  
33 60 and repeated daily for seven days, at day 14 and 30. Subjects will be randomised with a  
34  
35 61 computer-based system to HBO, maximum five times during the first seven days plus best  
36  
37 62 practice treatment or only best practice treatment. The primary endpoint, ICU admission, is  
38  
39 63 defined by criteria for selection for ICU. We will evaluate if HBO mitigates the inflammatory  
40  
41 64 reaction in COVID-19 using molecular analyses. All parameters are recorded in an electronic  
42  
43 65 case report form. An independent data safety monitoring board will review the safety  
44  
45 66 parameters.

46  
47 67 **Ethics and Dissemination** The trial is approved by The National Institutional Review Board in  
48  
49 68 Sweden (2020-01705) and the Swedish Medical Product Agency (5.1-2020-36673).

50  
51 69 **Trial Registration** NCT04327505. EudraCT number: 2020-001349-37

52  
53 70 **Funding** Vetenskapsrådet  
54  
55 71  
56 72  
57 73  
58 74  
59 75  
60

## STRENGTHS AND LIMITATIONS OF THIS STUDY

### Strengths

- Randomised controlled clinical trial in compliance with Good Clinical Practice
- Safety and efficacy endpoints together with multiple explanatory endpoints
- Independent Data Safety Monitoring Board

### Limitations

- No placebo, open label
- Power calculation is based on early pandemic data and “best practice treatment” have changed during the course of the trial.

## INTRODUCTION

### Clinical manifestations and challenges with COVID-19

Severe acute respiratory syndrome-coronavirus-2 (SARS-CoV-2) was first identified in China in December 2019.<sup>1</sup> The clinical infectious disease Corona virus disease 2019 (COVID-19) was declared a pandemic by the World Health Organization (WHO) on March 11, 2020; with more than 46 million confirmed cases and more than 1 million confirmed deaths by November 2, 2020.<sup>2</sup> Clinical experience from China and Italy was published early and even though the overall mortality is low (3.4%) the numbers from critical care were fearsome.<sup>3-6</sup> Mortality rates were as high as 90% in patients developing acute respiratory distress syndrome (ARDS) in early reports from Wuhan province. Later reports showed 28-day mortality rates of 61.5% in ICU patients with acute respiratory illness (Yang et al., 2020a) In a recent retrospective cohort study from Wuhan 19% of patients needed mechanical ventilation or extra corporal mechanical oxygenation (ECMO), 26% was admitted to ICU and hospital mortality rate was 28%.<sup>7</sup> SARS-CoV-2 enters human cells through Angiotensin Converting Enzyme 2 (ACE2) receptors, abundant in lungs, arteries, heart, kidney and intestines, causing a downstream activation of an inflammatory cascade that activates the innate immune system.<sup>8</sup> A synchronised immune response is vital in the control and resolution of viral infections. In some patients this activation and resolution is dysregulated, causing a disproportionate reaction, popularly called a cytokine storm.<sup>9</sup> Acute lung injury (ALI) associated with COVID-19 differs from other described ARDS with rapidly progressing respiratory failure and fibrosis. Even patients that have mild symptoms and survive COVID-19 may have significant changes on pulmonary Computed Tomography (CT), with diffuse ground glass opacities and crazy-paving pattern and consolidation suggesting severe inflammatory involvement.<sup>10</sup> Despite enormous efforts, a definite cure seems far away and

1  
2  
3 110 there is urgent need for effective treatments to reduce morbidity and mortality. Remdesivir,  
4  
5 111 Hydroxychloroquine, Lopinavir, and Interferon- $\beta$ 1a has been tested in a total of 11,266  
6  
7 112 subjects included, none of the drugs have been proven effective according to recently  
8  
9 113 published results from the WHO Solidarity trial.<sup>11</sup> Corticosteroids were tried early in the  
10  
11 114 pandemic with discouraging results, but recently preliminary results from the RECOVERY-  
12  
13 115 trial showed some reduction in 28-day mortality with dexamethasone, with better effect in  
14  
15 116 severe disease.<sup>12</sup> The RECOVERY-trial showed a mortality of 41,4% in the control group vs  
16  
17 117 29,3% in the group that received Dexamethasone among patients that needed mechanical  
18  
19 118 ventilation.<sup>12</sup> A recent systemic overview on ARDS reported mortality rates since 2010:  
20  
21 119 Overall mortality rates of in-hospital- 45%, ICU- 38% and 28/30-day- 30%.<sup>13</sup>  
22

23

### 24 121 **Rationale for the study and explanation of the hypothesis**

25 122 Macrophages, part of the innate immune system, have become major therapeutic targets in  
26  
27 123 ALI/ARDS. Macrophage activation is involved in the early phase of ARDS.<sup>14</sup> Alveolar  
28  
29 124 macrophages (AMs) are the gatekeepers of the innate immune system in the lungs.  
30  
31 125 Upon activation they secrete several inflammatory cytokines and chemokines including  
32  
33 126 Interleukin-1 beta (IL-1 $\beta$ ), Interleukin-6 (IL-6) and Tumor Necrosis Factor alpha (TNF- $\alpha$ ), to  
34  
35 127 attract T-helper1 (Th1)/T-helper 17 (Th17)-cells, new macrophages and neutrophils. AMs are  
36  
37 128 also responsible for clearing apoptotic neutrophils when the infection resolves. Proteomics  
38  
39 129 involved in the switch from inflammatory macrophage (M1) to resolving or anti-  
40  
41 130 inflammatory macrophage subtype (M2) was recently described in a human study of  
42  
43 131 ALI/ARDS.<sup>15</sup> Hypoxia Inducible factor-1 and 2 (HIF-1 and HIF-2) and inflammatory factors  
44  
45 132 such as signal transducer and activator of transcription 3 (STAT3) and nuclear factor kappa-  
46  
47 133 light-chain-enhancer of activated b-cells (NF $\kappa$ B) are important transcription factors involved  
48  
49 134 in macrophage polarisation. How and if it is possible to intervene with this intricate network  
50  
51 135 of redox signaling is not clear.<sup>16</sup> Hyperbaric oxygen (HBO) has been used for almost a  
52  
53 136 century, initially for decompression sickness (DCS), but it was soon noted that it had several  
54  
55 137 anti-inflammatory effects.<sup>17 18</sup> Recent evidence from animal studies suggest that HBO  
56  
57 138 ameliorate inflammation in DCS induced ALI through polarisation of macrophages from M1  
58  
59 139 to M2.<sup>19 20</sup> HBO has been shown to polarise macrophages from M1 to M2 associated with IL-  
60  
140 10 and thereby reduces inflammation,<sup>21 22</sup> and 30 min HBO ex vivo inhibit monocyte IL-1 $\beta$



1  
2  
3 141 and TNF- $\alpha$ .<sup>23</sup> Patients presenting to hospital with COVID-19 normally have almost a week of  
4  
5 142 mild or moderate flu-like symptoms but on admission often have an isolated hypoxic  
6  
7 143 respiratory failure. Many patients, despite severe hypoxemia do not have dyspnoea or  
8  
9 144 carbon dioxide retention suggesting a diffuse but moderate alveolar edema and a hypoxic  
10  
11 145 adaptation. Hypoxia is relative to the upregulation of adaptive mechanisms. When medical  
12  
13 146 oxygen is administered for a prolonged period the adaptive mechanisms are put out of play  
14  
15 147 and might aggravate oxidative stress. Hyperbaric oxygen will give patients a short burst of  
16  
17 148 oxidative stress and re-activate adaptive responses. The hypothesis of HBO as a safe and  
18  
19 149 effective treatment has been previously published.<sup>24 25</sup> Published case series from China and  
20  
21 150 the USA indicate that HBO in these patients may be safe and beneficial<sup>26-29</sup>. A propensity-  
22  
23 151 matched control study (n=20) from the USA showed 50% lower mortality and almost two  
24  
25 152 thirds less need for mechanical ventilation in the HBO treated group.<sup>30</sup>  
26  
27 153 HBO has the potential to reduce inflammation, restore normal defence mechanisms and  
28  
29 154 thereby reduce morbidity and mortality in COVID-19 pneumonitis  
30

155

### 156 **Remaining gap of evidence**

31  
32 157 HBO has been provided as “compassionate use” for Covid-19 and some evidence from small  
33  
34 158 case series and a prospective cohort suggests that it is safe and effective, but this needs to  
35  
36 159 be confirmed in randomised controlled trials. There are concerns regarding oxygen toxicity  
37  
38 160 in already inflamed lungs and the optimal dose and timing are still largely unknown. The  
39  
40 161 multiple explanatory outcome measures in our trial may answer some of these questions.  
41  
42 162 Here we report a summary of our protocol that adhere to International Council for  
43  
44 163 Harmonization- Good Clinical Practice (ICH-GCP) and Standard Protocol Items:  
45  
46 164 Recommendations for Interventional Trials (SPIRIT) guidelines,<sup>31</sup> the full protocol is available  
47  
48 165 on [clinicaltrials.gov](http://clinicaltrials.gov) or by request from the corresponding author. The SPIRIT checklist refers  
49  
50 166 to the full protocol.

167

### 168 **Hypothesis and Objectives**

54  
55 169 The overall hypothesis to be evaluated is that HBO reduce mortality, increase hypoxia  
56  
57 170 tolerance and prevent organ failure in patients with COVID19 pneumonitis by attenuating  
58  
59 171 the inflammatory response.

1  
2  
3 172 The primary objective is to evaluate if HBO reduces the number of ICU admissions compared  
4  
5 173 to Best practice for COVID-19. Main secondary objectives are to evaluate if HBO reduces the  
6  
7 174 load on ICU resources, morbidity and mortality in severe cases of COVID-19 and to evaluate  
8  
9 175 if HBO mitigates the inflammatory reaction in COVID-19. Other secondary objectives (in  
10  
11 176 selection) is to evaluate if HBO is safe for SARS-CoV-2 positive patients and staff.  
12  
13 177

## 14 178 **METHODS AND ANALYSIS**

### 15 16 179 **Study Design**

17  
18 180 Randomised, controlled, phase II, open label, multicentre trial conducted at hospitals with  
19  
20 181 hyperbaric facility and intensive care unit. The trial will investigate the safety and efficacy of  
21  
22 182 HBO for COVID-19 but also multiple explanatory outcomes. The total number of participants  
23  
24 183 will be 200 (100 per group) with a subgroup of 20 subjects for explanatory endpoints where  
25  
26 184 we collect blood for extended immunology. Block randomisation will be performed,  
27  
28 185 stratified by gender and site. The trial consists of 9 visits over 30 days after randomisation,  
29  
30 186 each visit consists of three parts; a) Review of medical records since last visit and  
31  
32 187 documentation in the electronic case report form (eCRF), b) Measurements and actions to  
33  
34 188 correct any deviations, c) HBO Treatment, if randomised (Visit 1-7 only) A flowchart of the  
35  
36 189 study design is depicted in *Figure 1*. and The Consolidated Standards of Reporting Trials  
37  
38 190 (CONSORT) flow chart of the trial is depicted in *Figure 2*.  
39

### 40 192 **Setting and Study Subjects**

41  
42 193 The Sponsor is Karolinska Institutet, Sweden and presently 3 centres in Sweden and  
43  
44 194 Germany are involved. Adult patients with SARS-CoV-2 infection, with at least two risk  
45  
46 195 factors for increased mortality, likely to develop ARDS criteria and need intubation within 7  
47  
48 196 days of admission to hospital will be screened. After information and signed informed  
49  
50 197 consent, study subjects will be checked for inclusion/exclusion criteria.

51 198 The inclusion/exclusion criteria are listed in *Table 1*.

52  
53 199 Table 1 COVID-19-HBO Overview of inclusion and exclusion criteria

|                       |                                                                    |
|-----------------------|--------------------------------------------------------------------|
| 54 Inclusion criteria | Aged 18-90 years                                                   |
| 55                    | PaO <sub>2</sub> /FiO <sub>2</sub> (PFI) below 200 mmHg (26.7 kPa) |
| 56                    | (based on ABG measurement)                                         |
| 57                    | Suspected or verified SARS-CoV-2 infection                         |
| 58                    |                                                                    |
| 59                    |                                                                    |
| 60                    |                                                                    |

|                    |                                                                                                                                                                                                                                                                                                                                                                                |
|--------------------|--------------------------------------------------------------------------------------------------------------------------------------------------------------------------------------------------------------------------------------------------------------------------------------------------------------------------------------------------------------------------------|
|                    | <p>At least two risk factors for increased morbidity/mortality</p> <ul style="list-style-type: none"> <li>• Age above 50 years</li> <li>• Hypertension</li> <li>• Cardiovascular disease</li> <li>• Diabetes or pre-diabetes</li> <li>• Active or cured cancer</li> <li>• Asthma/COPD</li> <li>• Smoking</li> <li>• D-Dimer &gt; 1.0</li> <li>• Auto-immune disease</li> </ul> |
| Exclusion Criteria | ARDS/pneumonia caused by other viral infections (positive for other virus)                                                                                                                                                                                                                                                                                                     |
|                    | ARDS/pneumonia caused by other non-viral infections or trauma                                                                                                                                                                                                                                                                                                                  |
|                    | Known pregnancy or positive pregnancy test in women of childbearing age                                                                                                                                                                                                                                                                                                        |
|                    | Patients with previous CT verified lung fibrosis more than 10%                                                                                                                                                                                                                                                                                                                 |
|                    | CT- or Spirometry-verified severe COPD with Emphysema                                                                                                                                                                                                                                                                                                                          |
|                    | Contraindication for HBO according to local guidelines                                                                                                                                                                                                                                                                                                                         |
|                    | Not likely to need ICU admission within 7 days of screening (Subjective criteria that may exclude any patients that fulfil the other inclusion criteria but where the treating physician suspect a spontaneous recovery)                                                                                                                                                       |
|                    | Mental inability, reluctance or language difficulties that result in difficulty understanding the meaning of study participation                                                                                                                                                                                                                                               |
|                    | Prisoner                                                                                                                                                                                                                                                                                                                                                                       |
|                    | Unable/risk to move patient to Hyperbaric chamber                                                                                                                                                                                                                                                                                                                              |

200

## 201 **Randomisation**

202 Subjects will be enrolled and randomised consecutively as they are found to be eligible for  
 203 inclusion in the study. HBO treatment will start within 24 hours of randomisation. Eligible  
 204 subjects will be randomised in a 1:1 allocation, stratified by site and gender in blocks  
 205 (blinded to all but the randomising clinical research associate at Karolinska Trial Alliance) to

7 (18)

206 either HBO or Control. The randomisation sequence is computer generated using  
207 RANDOMIZE.NET.

208

### 209 **Interventions**

210 HBO in addition to best practice compared with best practice

211 HBO: HBO 1.6-2.4 Atmospheres Absolute (ATA) for 30-60 min, maximum 5 treatments first 7  
212 days

213 Control: Best practice treatment for COVID-19

214 The first HBO treatment will be given within 24 hours after inclusion. Patients with  
215 respiratory symptoms admitted to the hospital will be informed and asked to participate.

216 The patients will be included once they fulfil the inclusion criteria and none of the exclusion  
217 criteria, but the timing of the HBO treatment will depend on available resources.

218

### 219 **Measurements**

220 After the patient has been informed about the study and if agreement to participate, an  
221 informed consent form (ICF) will be signed off before any study specific procedures occur.

222 During the Screening, procedures to assure the patient's eligibility for the study  
223 participation

224 will be performed. Females of childbearing potential will have a serum pregnancy test taken.

225 Demographics, medical history including COVID-19 specific history and review of routine

226 blood tests, secondary infections, viral load, radiology, concomitant medications before

227 inclusion will be recorded. Mean New early warning score (NEWS) for the past 24 hours

228 (three measurements 08, 14, 22 +/-2h) will be recorded if available (mean is calculated after

229 data is exported from eCRF at the end of Study). Baseline NEWS at inclusion will also be

230 recorded. A physical examination will be performed and a HBO specific questionnaire as per

231 local routine will be obtained. Subject will be randomised to either HBO (in addition to best

232 practice) or best practice. Routine chemistry and study specific blood tests will be collected.

233 A complete list of procedures is listed in *Table 2*.

234 Table 2 COVID-19-HBO List of procedures

235 **Visit 1-7 is 08-07:59 and Visit 8 and 9 are 7 days 08-07:59**

| Activity  | Visit 1 | Visit 2 | Visit 3 | Visit 4 | Visit 5 | Visit 6 | Visit 7 | Visit 8 | Visit 9 |
|-----------|---------|---------|---------|---------|---------|---------|---------|---------|---------|
| Day       | Day 1   | Day 2   | Day 3   | Day 4   | Day 5   | Day 6   | Day 7   | Day 14  | Day30   |
| Screening | x       |         |         |         |         |         |         |         |         |

|                                                   |           |         |         |         |         |         |         |         |         |
|---------------------------------------------------|-----------|---------|---------|---------|---------|---------|---------|---------|---------|
| Inclusion/exclusion criteria                      | x         |         |         |         |         |         |         |         |         |
| Pregnancy test if woman of childbearing age       | x         |         |         |         |         |         |         |         |         |
| HBO specific medical history/physical examination | x         |         |         |         |         |         |         |         |         |
| Signed Informed consent Form                      | x         |         |         |         |         |         |         |         |         |
| Randomisation                                     | x         |         |         |         |         |         |         |         |         |
| 1. Medical history                                | x         |         |         |         |         |         |         |         |         |
| 2. Demography*                                    | x         | x       | x       | x       | x       | x       | x       | x       | x       |
| 3. Concomitant medications                        | x         | x       | x       | x       | x       | x       | x       | x       | x       |
| 4. NEWS score                                     | x, x, x** | x, x, x | x, x, x | x, x, x | x, x, x | x, x, x | x, x, x | x, x, x | x, x, x |
| 5. Standard/ study specific biochemistry          | x         | x       | x       | x       | x       | x       | x       | x       | x       |
| 6. Study specific CBG/ABG                         | x, x, x** | x, x, x | x, x, x | x, x, x | x, x, x | x, x, x | x, x, x | x, x, x | x, x, x |
| 7. Plasma (microRNA)                              | x         | x       | x       | x       | x       | x       | x       | x       | x       |
| 8. CBG/ABG HBO                                    | 3x        | 3x      | 3x      | 3x      | 3x      | 3x      | 3x      |         |         |
| 9. HBO indicated/planned                          | x         | x       | x       | x       | x       | x       | x       |         |         |
| 10. HBO treatment                                 | x         | x       | x       | x       | x       | x       | x       |         |         |
| 11. AE                                            | x         | x       | x       | x       | x       | x       | x       | x       | x       |
| 12. ADR                                           | x         | x       | x       | x       | x       | x       | x       | x       | x       |
| 13. UPTD                                          | x         | x       | x       | x       | x       | x       | x       | x       | x       |
| 14. CPTD                                          | x         |         |         |         |         |         |         |         | x       |
| 15. ICU admission                                 |           | x       | x       | x       | x       | x       | x       | x       | x       |
| 16. Intubation/ mechanical ventilation            |           | x       | x       | x       | x       | x       | x       | x       | x       |
| 17. ICU mortality                                 |           | x       | x       | x       | x       | x       | x       | x       | x       |
| 18. Hospital mortality                            |           | x       | x       | x       | x       | x       | x       | x       | x       |
| 19. Overall mortality                             |           | x       | x       | x       | x       | x       | x       | x       | x       |
| 20. Secondary infections                          | x         | x       | x       | x       | x       | x       | x       | x       | x       |
| 21. Viral load                                    | x         | x       | x       | x       | x       | x       | x       | x       | x       |

|                                     |   |   |   |   |   |   |   |   |   |
|-------------------------------------|---|---|---|---|---|---|---|---|---|
| 22. Staff safety (Negative events)  | x | x | x | x | x | x | x | x | x |
| 23. Pulmonary CT (check records)    | x | x | x | x | x | x | x | x | x |
| 24. Chest X-ray (check records)     | x | x | x | x | x | x | x | x | x |
| 25. Chest Ultrasound (if available) | x | x | x | x | x | x | x | x | x |
| 26. Extended immunology (n=20)      | x |   |   | x |   |   | x | x | x |

236 \* Visit 2-9 Demography check only involves change in DNR status.

237 \*\* Depending on time of inclusion 1-3 samples/observations will be collected during visit 1  
 238 at the specified time points. Additionally, a baseline ABG (if not available from the patient's  
 239 medical records) and a baseline NEWS is collected.

240 CBG/ABG HBO is only collected on days of HBO treatment

241 All used acronyms and abbreviations are listed in the original protocol page 9-10  
 242 (Supplement)

243

#### 244 **Trial endpoints**

245 The primary endpoint is the proportion of subjects admitted to ICU from day 1 to day 30  
 246 based on predefined criteria for ICU admission. Main secondary efficacy endpoints are 30-  
 247 day mortality, time to intubation, time to ICU admission and mean change in inflammatory  
 248 response and main safety endpoints are measurement of AE and serious adverse events  
 249 (SAE). A complete list of endpoints is listed in *Table 3*.

#### 250 **Table 3 COVID-19-HBO Trial endpoints**

|                                          |                                                                                                                                                                                                                                                                                                                                                                                                                                                                                                                                                                     |
|------------------------------------------|---------------------------------------------------------------------------------------------------------------------------------------------------------------------------------------------------------------------------------------------------------------------------------------------------------------------------------------------------------------------------------------------------------------------------------------------------------------------------------------------------------------------------------------------------------------------|
| Primary endpoint                         | The proportion of subjects admitted to ICU from day 1 to day 30, based on at least one of the following criteria:<br>I. Rapid progression over hours<br>II. Lack of improvement on high flow oxygen >40L/min or non-invasive ventilation with fraction of inspired oxygen (FiO <sub>2</sub> ) > 0.6<br>III. Evolving Hypercapnia or increased work of breathing not responding to increased oxygen despite maximum standard of care available outside ICU<br>IV. Hemodynamic instability or multi organ failure with maximum standard of care available outside ICU |
| Secondary endpoints                      |                                                                                                                                                                                                                                                                                                                                                                                                                                                                                                                                                                     |
| <i>Main Secondary Efficacy Endpoints</i> | I. Proportion of subjects with 30-day mortality, all-cause mortality, from day 1 to day 30.<br>II. Time-to-Intubation, i.e. cumulative days free of invasive mechanical ventilation, from day 1 to day 30                                                                                                                                                                                                                                                                                                                                                           |

|                         |                                                                                                                                                                                                                                                                                                                                          |
|-------------------------|------------------------------------------------------------------------------------------------------------------------------------------------------------------------------------------------------------------------------------------------------------------------------------------------------------------------------------------|
|                         | III. Time-to-ICU, i.e. cumulative ICU free days, derived as the number of days from day 1 to ICU, where all ICU free subjects are censored at day 30.                                                                                                                                                                                    |
|                         | IV. Mean change in inflammatory response from day 1 to day 30. <ul style="list-style-type: none"> <li>a. White cell count + differentiation</li> <li>b. Procalcitonin</li> <li>c. C-Reactive protein</li> <li>d. Cytokines (IL-6) (if available at local laboratory)</li> <li>e. Ferritin</li> <li>f. D-Dimer</li> <li>g. LDH</li> </ul> |
|                         | VI. Overall Survival                                                                                                                                                                                                                                                                                                                     |
| <i>Safety Endpoints</i> | I. The number of subjects, proportion of subjects and number of events of AE.                                                                                                                                                                                                                                                            |
|                         | II. The number of subjects, proportion of subjects and number of events of SAE                                                                                                                                                                                                                                                           |
|                         | III. The number of subjects, proportion of subjects and number of events of SADR.                                                                                                                                                                                                                                                        |
|                         | IV. Mean change in PaO <sub>2</sub> /FiO <sub>2</sub> before and after HBO compared to mean variance in PaO <sub>2</sub> /FiO <sub>2</sub> in the control group during day 1 to day 7.                                                                                                                                                   |
|                         | V. Mean change in NEWS before and after HBO compared to mean change in daily NEWS in the control group during day 1-day 7.                                                                                                                                                                                                               |
|                         | VI. Number of negative events in staff associated with treatment of subject, (e.g. contact with aerosol from subject), number of events from day 1 to day 30 or last day in hospital if subject is discharged earlier, or at withdrawal.                                                                                                 |

251

252

### 253 Safety and adverse events

254 An independent Data Safety Monitoring Board (DSMB) will evaluate the safety data in the  
 255 context of the overall trial and the currently existing information about the study drug. The  
 256 DSMB is composed of 3 experts in their respective disciplines of medicine, clinical trial  
 257 methodology and conduct.

258 The DSMB will review the data during the course of the study, a charter delineating their  
 259 guidelines for operating and stopping rules for terminating individual patients, a portion or all  
 260 of the trial prematurely, was drawn up before the trial started. The members of the DSMB,  
 261 meeting plan and responsibilities are specified in the original protocol (page 8, 42-43).

262 The definition, handling, follow-up and reporting of adverse events are defined in the original  
 263 protocol (p.34-38)

11 (18)

1  
2  
3 2644  
5 265 **Statistical analysis**

6  
7 266 *Power calculation* The primary endpoint ICU admission is defined by criteria for selection for  
8  
9 267 ICU. We have assumed that 50% of the subjects will have at least one criterion during the  
10  
11 268 course of the study and we aim to reduce the ICU admission rate by 40%, i.e. to an ICU  
12  
13 269 admission rate of 30%. To achieve 80% power with type-I error rate of 0.05 (two-tailed) a  
14  
15 270 sample size of 93 subjects per group is required. We plan to enrol 200 subjects into this trial.  
16  
17 271 Interim analyses may decide to re-calculate sample-size for the trial.

18 272 Sample size calculation was done in nQuery version 7.  
19  
20 273

21  
22 274 Primary and secondary endpoints will be evaluated using the Intent-to-treat population (i.e.  
23  
24 275 all randomised subjects) and the primary endpoint also using the Per protocol population  
25  
26 276 (i.e. all randomised subjects with no major protocol violations). All randomised subjects will  
27  
28 277 be included in the safety population. The primary analysis of the primary endpoint will be  
29  
30 278 performed using the Cochran Mantel Haenszel test adjusting for randomisation strata site  
31  
32 279 and gender.

33 280

34  
35 281 **Patient involvement**

36 282 The study design and consent form were discussed with and approved by a patient  
37  
38 283 representative. We thank Nanda Holm, patient contact at Rare diseases Sweden for her  
39  
40 284 support.  
41

42 285

43  
44 286 **LIMITATIONS**

45  
46 287 There current trial has limitations and there are several potential threats to the validity and  
47  
48 288 generalisability of the results. First, due to the nature of the epidemic, available resources,  
49  
50 289 the risk of transport and contamination it would be unethical and possibly unsafe to conduct  
51  
52 290 a placebo-controlled trial. Second, "Best practice" have changed over the course of the  
53  
54 291 pandemic and it may differ between different countries and centres. In the evaluation of  
55  
56 292 safety and efficacy these aspects will be considered. Third, the sample size is calculated on  
57  
58 293 early pandemic data. The rationale for 1:1 randomisation is that this is a new disease and we  
59  
60 294 will use a slightly lower dose than often used in more stable patients without acute lung



1  
2  
3 295 injury. Also, 1:1 allocation will maximise the statistical power. If the interim analysis can  
4  
5 296 show supportive evidence for efficacy the trial committee/safety and data monitoring board  
6  
7 297 may choose to change the randomisation to 2:1.  
8  
9 298

10  
11 299

### **ETHICS AND DISSEMINATION**

12 300 HBO has the potential to prevent COVID-19 infection developing into ARDS and multi organ  
13  
14 301 failure and would then relieve ICU resources and potentially save lives. The nature of the  
15  
16 302 disease with high mortality and no effective cure make the risk group a “vulnerable group”  
17  
18 303 and it is important to make sure that the subjects are not unduly influenced by the  
19  
20 304 expectation or benefits associated with participation. Therefore, the study will be carried  
21  
22 305 out in compliance with ICH-GCP, respective national legislation and according to the  
23  
24 306 Declaration of Helsinki. The National Institutional review board in Sweden  
25  
26 307 (Etikprövningsmyndigheten, Dnr: 2020-01705 Application date 2020-03-27 and approval  
27  
28 308 date 2020-04-29 (included a request for amendment 2020-04-23 and amended 2020-04-23).  
29  
30 309 Approval by the Swedish Medical Product Agency (Läkemedelsverket) (LV: Application 2020-  
31  
32 310 04-23 and decision 2020-05-08), Dnr 5.1-2020-36673. The trial was registered online prior to  
33  
34 311 initiation on ClinicalTrials.gov (2020-03-31), NCT04327505 and on EU Clinical Trials Register  
35  
36 312 (2020-05-08), EudraCT number: 2020-001349-37. Applications have been submitted in  
37  
38 313 Germany (Ethics Commission Münster, no: 2020-648-f-S) .  
39  
40 314 The trial is monitored by Karolinska Trial Alliance (KTA), an independent organisation before  
41  
42 315 the trial started, during the trial conduct, and after the trial is completed, so as to ensure  
43  
44 316 that the trial is carried out according to the protocol and that data is collected, documented,  
45  
46 317 and reported according to ICH-GCP and applicable ethical and regulatory requirements.  
47  
48 318 Monitoring is performed as per the trial’s monitoring plan and is intended to ensure that the  
49  
50 319 subject’s rights, safety, and well-being are met as well as data in the eCRF are complete,  
51  
52 320 correct, and consistent with the source data. The monitoring will be performed by an  
53  
54 321 independent experienced monitor qualified in ICH-GCP, applicable national and  
55  
56 322 international regulations and the Declaration of Helsinki.  
57  
58 323 Results will be disseminated at national and international conferences and then published in  
59  
60 324 international peer-reviewed scientific journals with open access. Positive, negative and any  
325 inconclusive results will be published.

1  
2  
3 326 **CURRENT TRIAL STATUS**  
4

5 327 The first center was initiated 20 May 2020, 3 subjects has been randomised, and have  
6  
7 328 completed the trial. We are awaiting the second wave and plan to initiate more centers  
8  
9 329 during 2020-2021.  
10

11 330

12 331 **AUTHORS' CONTRIBUTIONS**  
13

14 332 AK is the coordinating investigator who wrote the hypothesis and developed most of the  
15  
16 333 protocol together with PL (sponsor representative). AK and PL wrote the applications to  
17  
18 334 Swedish IRB and MPA. KRW, JD, JK, MS, PB, NO, SN, OF, contributed with information to the  
19  
20 335 protocol and IRB/MPA applications. JD is principal investigator at Blekingesjukhuset. MK is  
21  
22 336 national coordinating investigator in Germany and principal investigator in Gelsenkirchen.  
23  
24 337 MP is principal investigator in Regensburg. MK and MP wrote the German IRB and MPA with  
25  
26 338 assistance of AK. All authors contributed to the current submission and critically reviewed  
27  
28 339 the manuscript. AK is corresponding author for this work, and attests that all listed authors  
29  
30 340 meet authorship criteria and that no others meeting the criteria have been omitted.  
31

32 341

33 342 **FUNDING**  
34

35 343 This work was supported by Vetenskapsrådet (KBF 2019-00446), made available by  
36  
37 344 redirecting funds to COVID-19 research originally awarded to Kenny Rodriguez-Wallberg.  
38

39 345

40 346 **COMPETING INTERESTS**  
41

42 347 Dr. Rodriguez-Wallberg reports grants from Vetenskapsrådet (Swedish Research Council),  
43  
44 348 during the conduct of the study; all other authors declare that they have no known  
45  
46 349 competing financial interests or personal relationships that could have appeared to  
47  
48 350 influence the work reported in this paper.  
49

50 351

51 352 **PATIENTS CONSENT**  
52

53 353 Obtained, Written  
54

55 354

56 355 **ETHICS APPROVAL**  
57

58 356 Sweden: Etikprövningsmyndigheten, Dnr: 2020-01705, Approved 2020-04-29  
59  
60

357 Swedish Medical Product Agency (Läkemedelsverket), Dnr 5.1-2020-36673, approved 2020-  
358 05-08.  
359 Europe: EudraCT number: 2020-001349-37

360

#### 361 **DATA SHARING**

362 The full study protocol, statistical plan and consent form will be publicly available. Data will  
363 be available on patient level; data will be pseudonymised, the full dataset and statistical  
364 code will be available upon request. A full description of the intended use of the data must  
365 be sent to the corresponding author for review and approval. Participant consent for data  
366 sharing is conditioned and new ethics approval may be required.

367

#### 368 **ACKNOWLEDGEMENTS**

369 We thank Georg Rinneberg, manager of the hyperbaric unit at Bergmannsheil und  
370 Kinderklinik Buer, Gelsenkirchen for his help with organising the trial in Germany. Clinical  
371 trial monitoring including conduct was done by Karolinska Trial Alliance, they also assisted  
372 with writing the protocol, eCRF, Laboratory manual, DSMB charter and IRB submission.  
373 Smart-Trial was used for creating the eCRF.

374

#### 375 **REFERENCES**

- 376 1. Yang Y, Peng F, Wang R, et al. The deadly coronaviruses: The 2003 SARS pandemic  
377 and the 2020 novel coronavirus epidemic in China. *J Autoimmun* 2020:102434. doi:  
378 10.1016/j.jaut.2020.102434 [published Online First: 2020/03/08]
- 379 2. (WHO) WHO. WHO Coronavirus Disease (COVID-19) Dashboard [web page]. 2020  
380 [updated 2020/11/02. Available from: <https://covid19.who.int/> accessed 11/02 2020.
- 381 3. Chen N, Zhou M, Dong X, et al. Epidemiological and clinical characteristics of 99 cases of  
382 2019 novel coronavirus pneumonia in Wuhan, China: a descriptive study. *Lancet*  
383 2020;395(10223):507-13. doi: 10.1016/S0140-6736(20)30211-7 [published Online  
384 First: 2020/02/03]
- 385 4. Yang J, Zheng Y, Gou X, et al. Prevalence of comorbidities in the novel Wuhan  
386 coronavirus (COVID-19) infection: a systematic review and meta-analysis. *Int J Infect*  
387 *Dis* 2020 doi: 10.1016/j.ijid.2020.03.017 [published Online First: 2020/03/17]
- 388 5. Arabi YM, Murthy S, Webb S. COVID-19: a novel coronavirus and a novel challenge for  
389 critical care. *Intensive care medicine* 2020 doi: 10.1007/s00134-020-05955-1  
390 [published Online First: 2020/03/04]
- 391 6. Grasselli G, Pesenti A, Cecconi M. Critical Care Utilization for the COVID-19 Outbreak in  
392 Lombardy, Italy: Early Experience and Forecast During an Emergency Response.  
393 *JAMA : the journal of the American Medical Association* 2020 doi:  
394 10.1001/jama.2020.4031 [published Online First: 2020/03/14]
- 395 7. Zhou F, Yu T, Du R, et al. Clinical course and risk factors for mortality of adult inpatients  
396 with COVID-19 in Wuhan, China: a retrospective cohort study. *Lancet*

- 1  
2  
3 397 2020;395(10229):1054-62. doi: 10.1016/S0140-6736(20)30566-3 [published Online  
4 398 First: 2020/03/15]
- 5 399 8. Wang Q, Zhang Y, Wu L, et al. Structural and Functional Basis of SARS-CoV-2 Entry by  
6 400 Using Human ACE2. *Cell* 2020 doi: 10.1016/j.cell.2020.03.045 [published Online  
7 401 First: 2020/04/11]
- 8 402 9. Guo YR, Cao QD, Hong ZS, et al. The origin, transmission and clinical therapies on  
9 403 coronavirus disease 2019 (COVID-19) outbreak - an update on the status. *Mil Med*  
10 404 *Res* 2020;7(1):11. doi: 10.1186/s40779-020-00240-0 [published Online First:  
11 405 2020/03/15]
- 12 406 10. Pan F, Ye T, Sun P, et al. Time Course of Lung Changes On Chest CT During Recovery  
13 407 From 2019 Novel Coronavirus (COVID-19) Pneumonia. *Radiology* 2020:200370. doi:  
14 408 10.1148/radiol.2020200370 [published Online First: 2020/02/14]
- 15 409 11. Pan H, Peto R, Abdool Karim Q, et al. Repurposed antiviral drugs for COVID-19; interim  
16 410 WHO SOLIDARITY trial results. *medRxiv* 2020:2020.10.15.20209817. doi:  
17 411 10.1101/2020.10.15.20209817
- 18 412 12. Group RC, Horby P, Lim WS, et al. Dexamethasone in Hospitalized Patients with Covid-  
19 413 19 - Preliminary Report. *The New England journal of medicine* 2020 doi:  
20 414 10.1056/NEJMoa2021436 [published Online First: 2020/07/18]
- 21 415 13. Maca J, Jor O, Holub M, et al. Past and Present ARDS Mortality Rates: A Systematic  
22 416 Review. *Respiratory care* 2017;62(1):113-22. doi: 10.4187/respcare.04716  
23 417 [published Online First: 2016/11/03]
- 24 418 14. Sulkowski S, Sulkowska M, Giedrojć J, et al. Evaluation of the effect of macrophage  
25 419 system activation on the intensity degree of early destructive changes in acute  
26 420 enzymatic lung injury. *Rocz Akad Med Białymst* 1997;42 Suppl 1:412-21. [published  
27 421 Online First: 1997/01/01]
- 28 422 15. Dong H, Li J, Lv Y, et al. Comparative analysis of the alveolar macrophage proteome in  
29 423 ALI/ARDS patients between the exudative phase and recovery phase. *BMC Immunol*  
30 424 2013;14:25. doi: 10.1186/1471-2172-14-25 [published Online First: 2013/06/19]
- 31 425 16. Brune B, Dehne N, Grossmann N, et al. Redox control of inflammation in macrophages.  
32 426 *Antioxid Redox Signal* 2013;19(6):595-637. doi: 10.1089/ars.2012.4785 [published  
33 427 Online First: 2013/01/15]
- 34 428 17. Gill AL, Bell CN. Hyperbaric oxygen: its uses, mechanisms of action and outcomes. *QJM*  
35 429 2004;97(7):385-95.
- 36 430 18. Thom SR. Hyperbaric oxygen: its mechanisms and efficacy. *Plast Reconstr Surg*  
37 431 2011;127 Suppl 1:131S-41S. doi: 10.1097/PRS.0b013e3181f8e2bf [published Online  
38 432 First: 2011/01/14]
- 39 433 19. Han CH, Zhang PX, Xu WG, et al. Polarization of macrophages in the blood after  
40 434 decompression in mice. *Med Gas Res* 2017;7(4):236-40. doi: 10.4103/2045-  
41 435 9912.215749 [published Online First: 2018/03/03]
- 42 436 20. Geng M, Zhou L, Liu X, et al. Hyperbaric oxygen treatment reduced the lung injury of  
43 437 type II decompression sickness. *Int J Clin Exp Pathol* 2015;8(2):1797-803. [published  
44 438 Online First: 2015/05/15]
- 45 439 21. Buras JA, Holt D, Orlov D, et al. Hyperbaric oxygen protects from sepsis mortality via an  
46 440 interleukin-10-dependent mechanism. *Critical care medicine* 2006;34(10):2624-9.  
47 441 doi: 10.1097/01.CCM.0000239438.22758.E0
- 48 442 22. Oyaizu T, Enomoto M, Yamamoto N, et al. Hyperbaric oxygen reduces inflammation,  
49 443 oxygenates injured muscle, and regenerates skeletal muscle via macrophage and  
50 444 satellite cell activation. *Scientific reports* 2018;8(1):1288. doi: 10.1038/s41598-018-  
51 445 19670-x [published Online First: 2018/01/24]
- 52 446 23. Benson RM, Minter LM, Osborne BA, et al. Hyperbaric oxygen inhibits stimulus-induced  
53 447 proinflammatory cytokine synthesis by human blood-derived monocyte-  
54 448 macrophages. *Clin Exp Immunol* 2003;134(1):57-62.

- 1  
2  
3 449 24. Kjellberg A, De Maio A, Lindholm P. Can hyperbaric oxygen safely serve as an anti-  
4 450 inflammatory treatment for COVID-19? *Medical Hypotheses* 2020;144 doi:  
5 451 10.1016/j.mehy.2020.110224 [published Online First: 30 Aug]  
6 452 25. De Maio A, Hightower LE. COVID-19, acute respiratory distress syndrome (ARDS), and  
7 453 hyperbaric oxygen therapy (HBOT): what is the link? *Cell Stress Chaperones* 2020:1-  
8 454 4. doi: 10.1007/s12192-020-01121-0 [published Online First: 2020/05/20]  
9 455 26. Guo D, Pan S, Wang M, et al. Hyperbaric oxygen therapy may be effective to improve  
10 456 hypoxemia in patients with severe COVID-2019 pneumonia: two case reports.  
11 457 *Undersea Hyperb Med* 2020;47(2):181-87. [published Online First: 2020/06/24]  
12 458 27. Zhong XT, X; Tang, Y; Chen, R;. The effect of hyperbaric oxygen therapy on hypoxia in  
13 459 patients with severe new coronavirus pneumonia: the first report. *Chinese Journal of*  
14 460 *Nautical Medicine and Hyperbaric Medicine* 2020(27) doi: 10.3760 [published Online  
15 461 First: 2020-02-24]  
16 462 28. Chen RT, Y; Zhong, X; Liang, Y; Li, B; Tao, X; Liao, B; . Efficacy analysis of hyperbaric  
17 463 oxygen therapy in the treatment of severe coronavirus disease 2019 patients. *Acad J*  
18 464 *Second Mil Med Univ* 2020;6(41):604-11.  
19 465 29. Thibodeaux K, Speyrer M, Raza A, et al. Hyperbaric oxygen therapy in preventing  
20 466 mechanical ventilation in COVID-19 patients: a retrospective case series. *J Wound*  
21 467 *Care* 2020;29(Sup5a):S4-S8. doi: 10.12968/jowc.2020.29.Sup5a.S4 [published  
22 468 Online First: 2020/05/16]  
23 469 30. Gorenstein SA, Castellano ML, Slone ES, et al. Hyperbaric oxygen therapy for COVID-  
24 470 19 patients with respiratory distress: treated cases versus propensity-matched  
25 471 controls. *Undersea Hyperb Med* 2020;47(3):405-13. [published Online First:  
26 472 2020/09/16]  
27 473 31. Chan AW, Tetzlaff JM, Gotzsche PC, et al. SPIRIT 2013 explanation and elaboration:  
28 474 guidance for protocols of clinical trials. *Bmj* 2013;346:e7586. doi: 10.1136/bmj.e7586  
29 475 [published Online First: 2013/01/11]  
30 476  
31 477  
32 478  
33 479  
34 480  
35 481  
36 482  
37 483  
38 484  
39 485  
40 486  
41 487  
42 488  
43 489  
44 490  
45 491  
46 492  
47 493  
48 494  
49 495  
50 496  
51 497  
52 498  
53 499  
54 500  
55 501  
56 502  
57  
58  
59  
60

1  
2  
3 **503 FIGURE LEGENDS**

4 504

5 505 Figure 1: Flowchart of the study design

6 506

7 507 Figure 2: Consolidated Standards of Reporting Trials (CONSORT) flow chart

8  
9  
10  
11  
12  
13  
14  
15  
16  
17  
18  
19  
20  
21  
22  
23  
24  
25  
26  
27  
28  
29  
30  
31  
32  
33  
34  
35  
36  
37  
38  
39  
40  
41  
42  
43  
44  
45  
46  
47  
48  
49  
50  
51  
52  
53  
54  
55  
56  
57  
58  
59  
60

For peer review only

1  
2  
3  
4  
5  
6  
7  
8  
9  
10  
11  
12  
13  
14  
15  
16  
17  
18  
19  
20  
21  
22  
23  
24  
25  
26  
27  
28  
29  
30  
31  
32  
33  
34  
35  
36  
37  
38  
39  
40  
41  
42  
43  
44  
45  
46  
47  
48  
49  
50  
51  
52  
53  
54  
55  
56  
57  
58  
59  
60

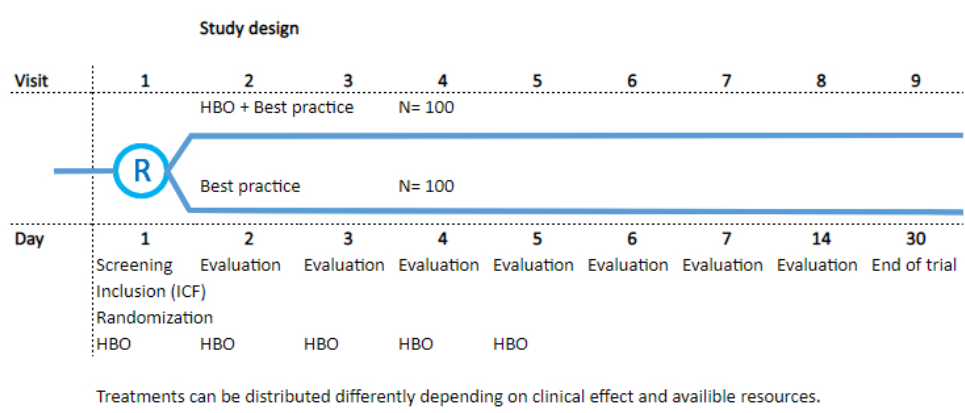

Study design

CONSORT-flow diagram COVID-19-HBO  
 (CONSORT, Consolidated Standards of Reporting Trials)

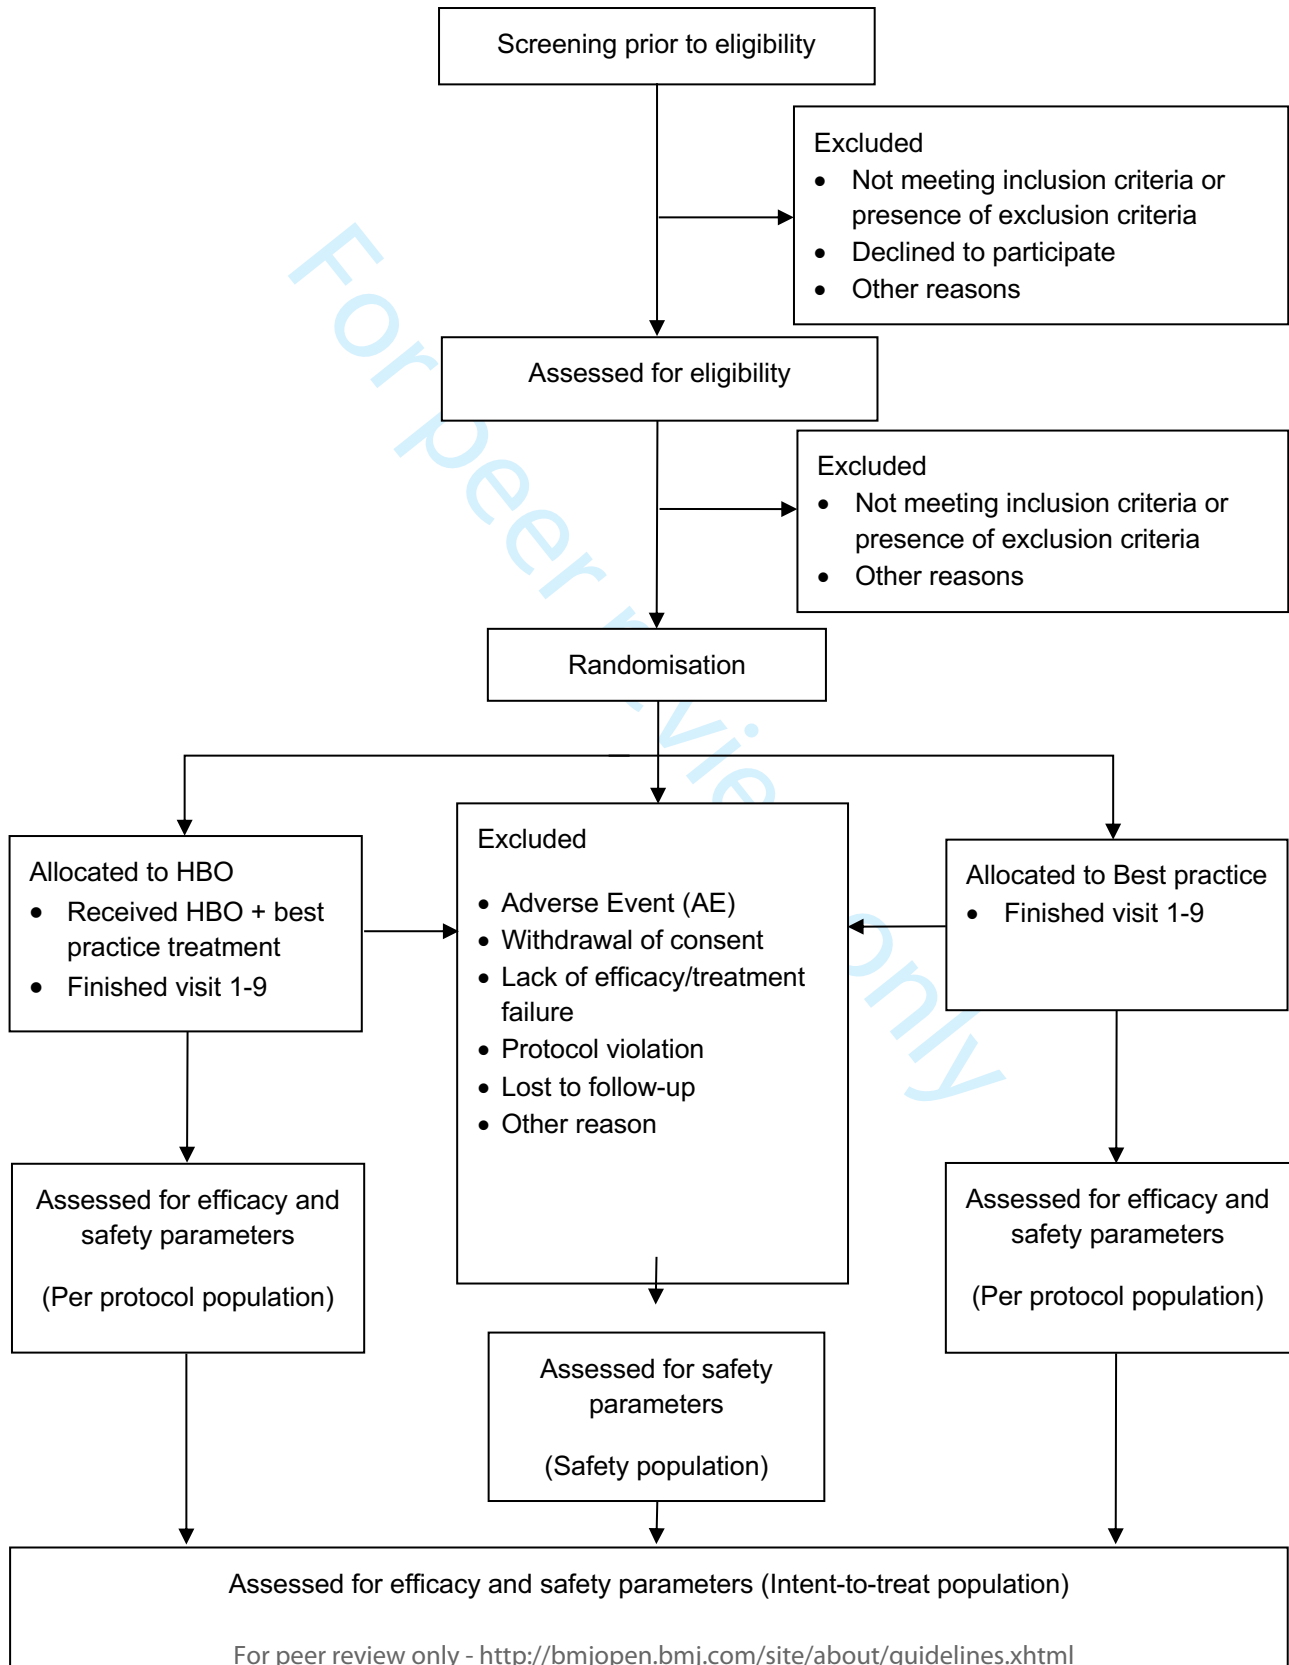



# Reporting checklist for protocol of a clinical trial.

Based on the SPIRIT guidelines.

## Instructions to authors

Complete this checklist by entering the page numbers from your manuscript where readers will find each of the items listed below.

Your article may not currently address all the items on the checklist. Please modify your text to include the missing information. If you are certain that an item does not apply, please write "n/a" and provide a short explanation.

Upload your completed checklist as an extra file when you submit to a journal.

In your methods section, say that you used the SPIRIT reporting guidelines, and cite them as:

Chan A-W, Tetzlaff JM, Gøtzsche PC, Altman DG, Mann H, Berlin J, Dickersin K, Hróbjartsson A, Schulz KF, Parulekar WR, Krleža-Jerić K, Laupacis A, Moher D. SPIRIT 2013 Explanation and Elaboration: Guidance for protocols of clinical trials. *BMJ*. 2013;346:e7586

|                                   |                     | Reporting Item                                                                                               | Page Number                 |
|-----------------------------------|---------------------|--------------------------------------------------------------------------------------------------------------|-----------------------------|
| <b>Administrative information</b> |                     |                                                                                                              |                             |
| Title                             | <a href="#">#1</a>  | Descriptive title identifying the study design, population, interventions, and, if applicable, trial acronym | 1                           |
| Trial registration                | <a href="#">#2a</a> | Trial identifier and registry name. If not yet registered, name of intended registry                         | 1                           |
| Trial registration: data set      | <a href="#">#2b</a> | All items from the World Health Organization Trial Registration Data Set                                     | 11-14                       |
| Protocol version                  | <a href="#">#3</a>  | Date and version identifier                                                                                  | 1                           |
| Funding                           | <a href="#">#4</a>  | Sources and types of financial, material, and other support                                                  | N/A, In current publication |

|    |                      |                     |                                                          |           |
|----|----------------------|---------------------|----------------------------------------------------------|-----------|
| 1  | Roles and            | <a href="#">#5a</a> | Names, affiliations, and roles of protocol contributors  | 7-8       |
| 2  | responsibilities:    |                     |                                                          |           |
| 3  | contributorship      |                     |                                                          |           |
| 4  |                      |                     |                                                          |           |
| 5  |                      |                     |                                                          |           |
| 6  | Roles and            | <a href="#">#5b</a> | Name and contact information for the trial sponsor       | 7         |
| 7  | responsibilities:    |                     |                                                          |           |
| 8  | sponsor contact      |                     |                                                          |           |
| 9  | information          |                     |                                                          |           |
| 10 |                      |                     |                                                          |           |
| 11 |                      |                     |                                                          |           |
| 12 |                      |                     |                                                          |           |
| 13 | Roles and            | <a href="#">#5c</a> | Role of study sponsor and funders, if any, in study      | N/A, In   |
| 14 | responsibilities:    |                     | design; collection, management, analysis, and            | current   |
| 15 | sponsor and funder   |                     | interpretation of data; writing of the report; and the   | publicati |
| 16 |                      |                     | decision to submit the report for publication, including | on        |
| 17 |                      |                     | whether they will have ultimate authority over any of    |           |
| 18 |                      |                     | these activities                                         |           |
| 19 |                      |                     |                                                          |           |
| 20 |                      |                     |                                                          |           |
| 21 |                      |                     |                                                          |           |
| 22 |                      |                     |                                                          |           |
| 23 | Roles and            | <a href="#">#5d</a> | Composition, roles, and responsibilities of the          | 7-8       |
| 24 | responsibilities:    |                     | coordinating centre, steering committee, endpoint        |           |
| 25 | committees           |                     | adjudication committee, data management team, and        |           |
| 26 |                      |                     | other individuals or groups overseeing the trial, if     |           |
| 27 |                      |                     | applicable (see Item 21a for data monitoring committee)  |           |
| 28 |                      |                     |                                                          |           |
| 29 |                      |                     |                                                          |           |
| 30 |                      |                     |                                                          |           |
| 31 | <b>Introduction</b>  |                     |                                                          |           |
| 32 |                      |                     |                                                          |           |
| 33 | Background and       | <a href="#">#6a</a> | Description of research question and justification for   | 14        |
| 34 | rationale            |                     | undertaking the trial, including summary of relevant     |           |
| 35 |                      |                     | studies (published and unpublished) examining benefits   |           |
| 36 |                      |                     | and harms for each intervention                          |           |
| 37 |                      |                     |                                                          |           |
| 38 |                      |                     |                                                          |           |
| 39 |                      |                     |                                                          |           |
| 40 | Background and       | <a href="#">#6b</a> | Explanation for choice of comparators                    | 14        |
| 41 | rationale: choice of |                     |                                                          |           |
| 42 | comparators          |                     |                                                          |           |
| 43 |                      |                     |                                                          |           |
| 44 |                      |                     |                                                          |           |
| 45 | Objectives           | <a href="#">#7</a>  | Specific objectives or hypotheses                        | 18        |
| 46 |                      |                     |                                                          |           |
| 47 |                      |                     |                                                          |           |
| 48 | Trial design         | <a href="#">#8</a>  | Description of trial design including type of trial (eg, | 20        |
| 49 |                      |                     | parallel group, crossover, factorial, single group),     |           |
| 50 |                      |                     | allocation ratio, and framework (eg, superiority,        |           |
| 51 |                      |                     | equivalence, non-inferiority, exploratory)               |           |
| 52 |                      |                     |                                                          |           |
| 53 |                      |                     |                                                          |           |
| 54 |                      |                     |                                                          |           |

**Methods:**  
**Participants,**

**interventions, and  
outcomes**

|    |                                    |                      |                                                                                                                                                                                                                                                                                                                                                                                                                                                                    |
|----|------------------------------------|----------------------|--------------------------------------------------------------------------------------------------------------------------------------------------------------------------------------------------------------------------------------------------------------------------------------------------------------------------------------------------------------------------------------------------------------------------------------------------------------------|
| 1  |                                    |                      |                                                                                                                                                                                                                                                                                                                                                                                                                                                                    |
| 2  |                                    |                      |                                                                                                                                                                                                                                                                                                                                                                                                                                                                    |
| 3  |                                    |                      |                                                                                                                                                                                                                                                                                                                                                                                                                                                                    |
| 4  | Study setting                      | <a href="#">#9</a>   | Description of study settings (eg, community clinic, 7-8<br>academic hospital) and list of countries where data will<br>5<br>6<br>7<br>8<br>9<br>be collected. Reference to where list of study sites can<br>be obtained                                                                                                                                                                                                                                           |
| 10 |                                    |                      |                                                                                                                                                                                                                                                                                                                                                                                                                                                                    |
| 11 | Eligibility criteria               | <a href="#">#10</a>  | Inclusion and exclusion criteria for participants. If 30-31<br>12<br>13<br>14<br>15<br>16<br>applicable, eligibility criteria for study centres and<br>individuals who will perform the interventions (eg,<br>surgeons, psychotherapists)                                                                                                                                                                                                                          |
| 17 |                                    |                      |                                                                                                                                                                                                                                                                                                                                                                                                                                                                    |
| 18 | Interventions:<br>description      | <a href="#">#11a</a> | Interventions for each group with sufficient detail to 32-33<br>19<br>20<br>21<br>22<br>allow replication, including how and when they will be<br>administered                                                                                                                                                                                                                                                                                                     |
| 23 | Interventions:<br>modifications    | <a href="#">#11b</a> | Criteria for discontinuing or modifying allocated 34-38<br>24<br>25<br>26<br>27<br>28<br>interventions for a given trial participant (eg, drug dose<br>change in response to harms, participant request, or<br>improving / worsening disease)                                                                                                                                                                                                                      |
| 29 |                                    |                      |                                                                                                                                                                                                                                                                                                                                                                                                                                                                    |
| 30 | Interventions:<br>adherence        | <a href="#">#11c</a> | Strategies to improve adherence to intervention 41-43<br>31<br>32<br>33<br>34<br>protocols, and any procedures for monitoring adherence<br>(eg, drug tablet return; laboratory tests)                                                                                                                                                                                                                                                                              |
| 35 | Interventions:<br>concomitant care | <a href="#">#11d</a> | Relevant concomitant care and interventions that are 33<br>36<br>37<br>38<br>permitted or prohibited during the trial                                                                                                                                                                                                                                                                                                                                              |
| 39 | Outcomes                           | <a href="#">#12</a>  | Primary, secondary, and other outcomes, including the 18-20<br>40<br>41<br>42<br>43<br>44<br>45<br>46<br>47<br>48<br>49<br>specific measurement variable (eg, systolic blood<br>pressure), analysis metric (eg, change from baseline,<br>final value, time to event), method of aggregation (eg,<br>median, proportion), and time point for each outcome.<br>Explanation of the clinical relevance of chosen efficacy<br>and harm outcomes is strongly recommended |
| 50 | Participant timeline               | <a href="#">#13</a>  | Time schedule of enrolment, interventions (including 21<br>51<br>52<br>53<br>54<br>55<br>56<br>any run-ins and washouts), assessments, and visits for<br>participants. A schematic diagram is highly<br>recommended (see Figure)                                                                                                                                                                                                                                   |
| 57 | Sample size                        | <a href="#">#14</a>  | Estimated number of participants needed to achieve 38-39<br>58<br>59<br>60<br>study objectives and how it was determined, including                                                                                                                                                                                                                                                                                                                                |

clinical and statistical assumptions supporting any sample size calculations

|                                           |             |                     |                                                                                     |                                 |
|-------------------------------------------|-------------|---------------------|-------------------------------------------------------------------------------------|---------------------------------|
| 1<br>2<br>3<br>4<br>5<br>6<br>7<br>8<br>9 | Recruitment | <a href="#">#15</a> | Strategies for achieving adequate participant enrolment to reach target sample size | N/A,<br>ongoing<br>pandemi<br>c |
|-------------------------------------------|-------------|---------------------|-------------------------------------------------------------------------------------|---------------------------------|

10  
11 **Methods: Assignment**  
12 **of interventions (for**  
13 **controlled trials)**  
14

|                                                                      |                                 |                      |                                                                                                                                                                                                                                                                                                                                                          |    |
|----------------------------------------------------------------------|---------------------------------|----------------------|----------------------------------------------------------------------------------------------------------------------------------------------------------------------------------------------------------------------------------------------------------------------------------------------------------------------------------------------------------|----|
| 15<br>16<br>17<br>18<br>19<br>20<br>21<br>22<br>23<br>24<br>25<br>26 | Allocation: sequence generation | <a href="#">#16a</a> | Method of generating the allocation sequence (eg, computer-generated random numbers), and list of any factors for stratification. To reduce predictability of a random sequence, details of any planned restriction (eg, blocking) should be provided in a separate document that is unavailable to those who enrol participants or assign interventions | 33 |
|----------------------------------------------------------------------|---------------------------------|----------------------|----------------------------------------------------------------------------------------------------------------------------------------------------------------------------------------------------------------------------------------------------------------------------------------------------------------------------------------------------------|----|

|                                        |                                  |                      |                                                                                                                                                                                                           |    |
|----------------------------------------|----------------------------------|----------------------|-----------------------------------------------------------------------------------------------------------------------------------------------------------------------------------------------------------|----|
| 27<br>28<br>29<br>30<br>31<br>32<br>33 | Allocation concealment mechanism | <a href="#">#16b</a> | Mechanism of implementing the allocation sequence (eg, central telephone; sequentially numbered, opaque, sealed envelopes), describing any steps to conceal the sequence until interventions are assigned | 33 |
|----------------------------------------|----------------------------------|----------------------|-----------------------------------------------------------------------------------------------------------------------------------------------------------------------------------------------------------|----|

|                            |                            |                      |                                                                                                                           |    |
|----------------------------|----------------------------|----------------------|---------------------------------------------------------------------------------------------------------------------------|----|
| 34<br>35<br>36<br>37<br>38 | Allocation: implementation | <a href="#">#16c</a> | Who will generate the allocation sequence, who will enrol participants, and who will assign participants to interventions | 33 |
|----------------------------|----------------------------|----------------------|---------------------------------------------------------------------------------------------------------------------------|----|

|                                  |                    |                      |                                                                                                                                           |     |
|----------------------------------|--------------------|----------------------|-------------------------------------------------------------------------------------------------------------------------------------------|-----|
| 39<br>40<br>41<br>42<br>43<br>44 | Blinding (masking) | <a href="#">#17a</a> | Who will be blinded after assignment to interventions (eg, trial participants, care providers, outcome assessors, data analysts), and how | N/A |
|----------------------------------|--------------------|----------------------|-------------------------------------------------------------------------------------------------------------------------------------------|-----|

|                            |                                          |                      |                                                                                                                                                      |     |
|----------------------------|------------------------------------------|----------------------|------------------------------------------------------------------------------------------------------------------------------------------------------|-----|
| 45<br>46<br>47<br>48<br>49 | Blinding (masking): emergency unblinding | <a href="#">#17b</a> | If blinded, circumstances under which unblinding is permissible, and procedure for revealing a participant's allocated intervention during the trial | N/A |
|----------------------------|------------------------------------------|----------------------|------------------------------------------------------------------------------------------------------------------------------------------------------|-----|

50 **Methods: Data**  
51 **collection,**  
52 **management, and**  
53 **analysis**  
54  
55

|                            |                      |                      |                                                                                                       |    |
|----------------------------|----------------------|----------------------|-------------------------------------------------------------------------------------------------------|----|
| 56<br>57<br>58<br>59<br>60 | Data collection plan | <a href="#">#18a</a> | Plans for assessment and collection of outcome, baseline, and other trial data, including any related | 45 |
|----------------------------|----------------------|----------------------|-------------------------------------------------------------------------------------------------------|----|

processes to promote data quality (eg, duplicate measurements, training of assessors) and a description of study instruments (eg, questionnaires, laboratory tests) along with their reliability and validity, if known. Reference to where data collection forms can be found, if not in the protocol

|    |                            |                      |                                                           |
|----|----------------------------|----------------------|-----------------------------------------------------------|
| 1  |                            |                      |                                                           |
| 2  |                            |                      |                                                           |
| 3  |                            |                      |                                                           |
| 4  |                            |                      |                                                           |
| 5  |                            |                      |                                                           |
| 6  |                            |                      |                                                           |
| 7  |                            |                      |                                                           |
| 8  |                            |                      |                                                           |
| 9  |                            |                      |                                                           |
| 10 | Data collection plan:      | <a href="#">#18b</a> | Plans to promote participant retention and complete       |
| 11 | retention                  |                      | follow-up, including list of any outcome data to be       |
| 12 |                            |                      | collected for participants who discontinue or deviate     |
| 13 |                            |                      | from intervention protocols                               |
| 14 |                            |                      |                                                           |
| 15 |                            |                      |                                                           |
| 16 |                            |                      |                                                           |
| 17 | Data management            | <a href="#">#19</a>  | Plans for data entry, coding, security, and storage,      |
| 18 |                            |                      | including any related processes to promote data quality   |
| 19 |                            |                      | (eg, double data entry; range checks for data values).    |
| 20 |                            |                      | Reference to where details of data management             |
| 21 |                            |                      | procedures can be found, if not in the protocol           |
| 22 |                            |                      |                                                           |
| 23 |                            |                      |                                                           |
| 24 |                            |                      |                                                           |
| 25 | Statistics: outcomes       | <a href="#">#20a</a> | Statistical methods for analysing primary and secondary   |
| 26 |                            |                      | outcomes. Reference to where other details of the         |
| 27 |                            |                      | statistical analysis plan can be found, if not in the     |
| 28 |                            |                      | protocol                                                  |
| 29 |                            |                      |                                                           |
| 30 |                            |                      |                                                           |
| 31 |                            |                      |                                                           |
| 32 | Statistics: additional     | <a href="#">#20b</a> | Methods for any additional analyses (eg, subgroup and     |
| 33 | analyses                   |                      | adjusted analyses)                                        |
| 34 |                            |                      |                                                           |
| 35 |                            |                      |                                                           |
| 36 | Statistics: analysis       | <a href="#">#20c</a> | Definition of analysis population relating to protocol    |
| 37 | population and missing     |                      | non-adherence (eg, as randomised analysis), and any       |
| 38 | data                       |                      | statistical methods to handle missing data (eg, multiple  |
| 39 |                            |                      | imputation)                                               |
| 40 |                            |                      |                                                           |
| 41 |                            |                      |                                                           |
| 42 | <b>Methods: Monitoring</b> |                      |                                                           |
| 43 |                            |                      |                                                           |
| 44 |                            |                      |                                                           |
| 45 | Data monitoring:           | <a href="#">#21a</a> | Composition of data monitoring committee (DMC);           |
| 46 | formal committee           |                      | summary of its role and reporting structure; statement of |
| 47 |                            |                      | whether it is independent from the sponsor and            |
| 48 |                            |                      | competing interests; and reference to where further       |
| 49 |                            |                      | details about its charter can be found, if not in the     |
| 50 |                            |                      | protocol. Alternatively, an explanation of why a DMC is   |
| 51 |                            |                      | not needed                                                |
| 52 |                            |                      |                                                           |
| 53 |                            |                      |                                                           |
| 54 |                            |                      |                                                           |
| 55 |                            |                      |                                                           |
| 56 | Data monitoring:           | <a href="#">#21b</a> | Description of any interim analyses and stopping          |
| 57 | interim analysis           |                      | guidelines, including who will have access to these       |
| 58 |                            |                      |                                                           |
| 59 |                            |                      |                                                           |
| 60 |                            |                      |                                                           |

interim results and make the final decision to terminate the trial

|    |                          |                      |                                                                  |
|----|--------------------------|----------------------|------------------------------------------------------------------|
| 1  |                          |                      |                                                                  |
| 2  |                          |                      |                                                                  |
| 3  |                          |                      |                                                                  |
| 4  | Harms                    | <a href="#">#22</a>  | Plans for collecting, assessing, reporting, and managing 34-38   |
| 5  |                          |                      | solicited and spontaneously reported adverse events and          |
| 6  |                          |                      | other unintended effects of trial interventions or trial         |
| 7  |                          |                      | conduct                                                          |
| 8  |                          |                      |                                                                  |
| 9  |                          |                      |                                                                  |
| 10 |                          |                      |                                                                  |
| 11 | Auditing                 | <a href="#">#23</a>  | Frequency and procedures for auditing trial conduct, if 41-43    |
| 12 |                          |                      | any, and whether the process will be independent from            |
| 13 |                          |                      | investigators and the sponsor                                    |
| 14 |                          |                      |                                                                  |
| 15 |                          |                      |                                                                  |
| 16 | <b>Ethics and</b>        |                      |                                                                  |
| 17 | <b>dissemination</b>     |                      |                                                                  |
| 18 |                          |                      |                                                                  |
| 19 |                          |                      |                                                                  |
| 20 | Research ethics          | <a href="#">#24</a>  | Plans for seeking research ethics committee / 43-44              |
| 21 | approval                 |                      | institutional review board (REC / IRB) approval                  |
| 22 |                          |                      |                                                                  |
| 23 |                          |                      |                                                                  |
| 24 | Protocol amendments      | <a href="#">#25</a>  | Plans for communicating important protocol 45                    |
| 25 |                          |                      | modifications (eg, changes to eligibility criteria,              |
| 26 |                          |                      | outcomes, analyses) to relevant parties (eg,                     |
| 27 |                          |                      | investigators, REC / IRBs, trial participants, trial             |
| 28 |                          |                      | registries, journals, regulators)                                |
| 29 |                          |                      |                                                                  |
| 30 |                          |                      |                                                                  |
| 31 |                          |                      |                                                                  |
| 32 | Consent or assent        | <a href="#">#26a</a> | Who will obtain informed consent or assent from 44               |
| 33 |                          |                      | potential trial participants or authorised surrogates, and       |
| 34 |                          |                      | how (see Item 32)                                                |
| 35 |                          |                      |                                                                  |
| 36 |                          |                      |                                                                  |
| 37 | Consent or assent:       | <a href="#">#26b</a> | Additional consent provisions for collection and use of 44       |
| 38 | ancillary studies        |                      | participant data and biological specimens in ancillary           |
| 39 |                          |                      | studies, if applicable                                           |
| 40 |                          |                      |                                                                  |
| 41 |                          |                      |                                                                  |
| 42 |                          |                      |                                                                  |
| 43 | Confidentiality          | <a href="#">#27</a>  | How personal information about potential and enrolled 43, 45     |
| 44 |                          |                      | participants will be collected, shared, and maintained in        |
| 45 |                          |                      | order to protect confidentiality before, during, and after       |
| 46 |                          |                      | the trial                                                        |
| 47 |                          |                      |                                                                  |
| 48 |                          |                      |                                                                  |
| 49 | Declaration of interests | <a href="#">#28</a>  | Financial and other competing interests for principal N/A        |
| 50 |                          |                      | investigators for the overall trial and each study site included |
| 51 |                          |                      | in                                                               |
| 52 |                          |                      | current                                                          |
| 53 |                          |                      | publicati                                                        |
| 54 |                          |                      | on                                                               |
| 55 |                          |                      |                                                                  |
| 56 |                          |                      |                                                                  |
| 57 |                          |                      |                                                                  |
| 58 |                          |                      |                                                                  |
| 59 |                          |                      |                                                                  |
| 60 |                          |                      |                                                                  |

|    |                                             |                      |                                                                                                                                                                                                                                                                                     |                                                       |
|----|---------------------------------------------|----------------------|-------------------------------------------------------------------------------------------------------------------------------------------------------------------------------------------------------------------------------------------------------------------------------------|-------------------------------------------------------|
| 1  | Data access                                 | <a href="#">#29</a>  | Statement of who will have access to the final trial dataset, and disclosure of contractual agreements that limit such access for investigators                                                                                                                                     | 45                                                    |
| 2  |                                             |                      |                                                                                                                                                                                                                                                                                     |                                                       |
| 3  |                                             |                      |                                                                                                                                                                                                                                                                                     |                                                       |
| 4  |                                             |                      |                                                                                                                                                                                                                                                                                     |                                                       |
| 5  |                                             |                      |                                                                                                                                                                                                                                                                                     |                                                       |
| 6  | Ancillary and post trial care               | <a href="#">#30</a>  | Provisions, if any, for ancillary and post-trial care, and for compensation to those who suffer harm from trial participation                                                                                                                                                       | 44                                                    |
| 7  |                                             |                      |                                                                                                                                                                                                                                                                                     |                                                       |
| 8  |                                             |                      |                                                                                                                                                                                                                                                                                     |                                                       |
| 9  |                                             |                      |                                                                                                                                                                                                                                                                                     |                                                       |
| 10 |                                             |                      |                                                                                                                                                                                                                                                                                     |                                                       |
| 11 | Dissemination policy: trial results         | <a href="#">#31a</a> | Plans for investigators and sponsor to communicate trial results to participants, healthcare professionals, the public, and other relevant groups (eg, via publication, reporting in results databases, or other data sharing arrangements), including any publication restrictions | 46                                                    |
| 12 |                                             |                      |                                                                                                                                                                                                                                                                                     |                                                       |
| 13 |                                             |                      |                                                                                                                                                                                                                                                                                     |                                                       |
| 14 |                                             |                      |                                                                                                                                                                                                                                                                                     |                                                       |
| 15 |                                             |                      |                                                                                                                                                                                                                                                                                     |                                                       |
| 16 |                                             |                      |                                                                                                                                                                                                                                                                                     |                                                       |
| 17 |                                             |                      |                                                                                                                                                                                                                                                                                     |                                                       |
| 18 |                                             |                      |                                                                                                                                                                                                                                                                                     |                                                       |
| 19 |                                             |                      |                                                                                                                                                                                                                                                                                     |                                                       |
| 20 | Dissemination policy: authorship            | <a href="#">#31b</a> | Authorship eligibility guidelines and any intended use of professional writers                                                                                                                                                                                                      | N/A                                                   |
| 21 |                                             |                      |                                                                                                                                                                                                                                                                                     |                                                       |
| 22 |                                             |                      |                                                                                                                                                                                                                                                                                     |                                                       |
| 23 |                                             |                      |                                                                                                                                                                                                                                                                                     |                                                       |
| 24 | Dissemination policy: reproducible research | <a href="#">#31c</a> | Plans, if any, for granting public access to the full protocol, participant-level dataset, and statistical code                                                                                                                                                                     | 45                                                    |
| 25 |                                             |                      |                                                                                                                                                                                                                                                                                     |                                                       |
| 26 |                                             |                      |                                                                                                                                                                                                                                                                                     |                                                       |
| 27 |                                             |                      |                                                                                                                                                                                                                                                                                     |                                                       |
| 28 | <b>Appendices</b>                           |                      |                                                                                                                                                                                                                                                                                     |                                                       |
| 29 |                                             |                      |                                                                                                                                                                                                                                                                                     |                                                       |
| 30 | Informed consent materials                  | <a href="#">#32</a>  | Model consent form and other related documentation given to participants and authorised surrogates                                                                                                                                                                                  | N/A can be sent on request                            |
| 31 |                                             |                      |                                                                                                                                                                                                                                                                                     |                                                       |
| 32 |                                             |                      |                                                                                                                                                                                                                                                                                     |                                                       |
| 33 |                                             |                      |                                                                                                                                                                                                                                                                                     |                                                       |
| 34 |                                             |                      |                                                                                                                                                                                                                                                                                     |                                                       |
| 35 |                                             |                      |                                                                                                                                                                                                                                                                                     |                                                       |
| 36 |                                             |                      |                                                                                                                                                                                                                                                                                     |                                                       |
| 37 | Biological specimens                        | <a href="#">#33</a>  | Plans for collection, laboratory evaluation, and storage of biological specimens for genetic or molecular analysis in the current trial and for future use in ancillary studies, if applicable                                                                                      | N/A Separate Laboratory manual can be sent on request |
| 38 |                                             |                      |                                                                                                                                                                                                                                                                                     |                                                       |
| 39 |                                             |                      |                                                                                                                                                                                                                                                                                     |                                                       |
| 40 |                                             |                      |                                                                                                                                                                                                                                                                                     |                                                       |
| 41 |                                             |                      |                                                                                                                                                                                                                                                                                     |                                                       |
| 42 |                                             |                      |                                                                                                                                                                                                                                                                                     |                                                       |
| 43 |                                             |                      |                                                                                                                                                                                                                                                                                     |                                                       |
| 44 |                                             |                      |                                                                                                                                                                                                                                                                                     |                                                       |
| 45 |                                             |                      |                                                                                                                                                                                                                                                                                     |                                                       |
| 46 |                                             |                      |                                                                                                                                                                                                                                                                                     |                                                       |
| 47 |                                             |                      |                                                                                                                                                                                                                                                                                     |                                                       |
| 48 |                                             |                      |                                                                                                                                                                                                                                                                                     |                                                       |
| 49 |                                             |                      |                                                                                                                                                                                                                                                                                     |                                                       |

## Notes:

- 4: N/A, In current publication
- 5c: N/A, In current publication
- 15: N/A, ongoing pandemic
- 17a: N/A, open label

- 1 • 17b: N/A, open label
- 2
- 3 • 28: N/A included in current publication
- 4
- 5 • 32: N/A can be sent on request
- 6
- 7 • 33: N/A Separate Laboratory manual can be sent on request
- 8
- 9
- 10 • The SPIRIT checklist is distributed under the terms of the Creative Commons Attribution License CC-BY-
- 11 ND 3.0. This checklist was completed on 26. October 2020 using <https://www.goodreports.org/>, a tool
- 12 made by the [EQUATOR Network](#) in collaboration with [Penelope.ai](#)
- 13
- 14
- 15
- 16
- 17
- 18
- 19
- 20
- 21
- 22
- 23
- 24
- 25
- 26
- 27
- 28
- 29
- 30
- 31
- 32
- 33
- 34
- 35
- 36
- 37
- 38
- 39
- 40
- 41
- 42
- 43
- 44
- 45
- 46
- 47
- 48
- 49
- 50
- 51
- 52
- 53
- 54
- 55
- 56
- 57
- 58
- 59
- 60



# BMJ Open

## A Randomized, Controlled, Open Label, Multicentre Clinical Trial to explore Safety and Efficacy of Hyperbaric Oxygen for preventing ICU admission, Morbidity and Mortality in Adult Patients With COVID-19

|                                 |                                                                                                                                                                                                                                                                                                                                                                                                                                                                                                                                                                                                                                                                                                                                                                                                                                                                                                                                                                                                                                                                                                                                                                                                                                                                                                                                                                                                                                                                                                                                                                                                                                                                                                                                                                                       |
|---------------------------------|---------------------------------------------------------------------------------------------------------------------------------------------------------------------------------------------------------------------------------------------------------------------------------------------------------------------------------------------------------------------------------------------------------------------------------------------------------------------------------------------------------------------------------------------------------------------------------------------------------------------------------------------------------------------------------------------------------------------------------------------------------------------------------------------------------------------------------------------------------------------------------------------------------------------------------------------------------------------------------------------------------------------------------------------------------------------------------------------------------------------------------------------------------------------------------------------------------------------------------------------------------------------------------------------------------------------------------------------------------------------------------------------------------------------------------------------------------------------------------------------------------------------------------------------------------------------------------------------------------------------------------------------------------------------------------------------------------------------------------------------------------------------------------------|
| Journal:                        | <i>BMJ Open</i>                                                                                                                                                                                                                                                                                                                                                                                                                                                                                                                                                                                                                                                                                                                                                                                                                                                                                                                                                                                                                                                                                                                                                                                                                                                                                                                                                                                                                                                                                                                                                                                                                                                                                                                                                                       |
| Manuscript ID                   | bmjopen-2020-046738.R1                                                                                                                                                                                                                                                                                                                                                                                                                                                                                                                                                                                                                                                                                                                                                                                                                                                                                                                                                                                                                                                                                                                                                                                                                                                                                                                                                                                                                                                                                                                                                                                                                                                                                                                                                                |
| Article Type:                   | Protocol                                                                                                                                                                                                                                                                                                                                                                                                                                                                                                                                                                                                                                                                                                                                                                                                                                                                                                                                                                                                                                                                                                                                                                                                                                                                                                                                                                                                                                                                                                                                                                                                                                                                                                                                                                              |
| Date Submitted by the Author:   | 09-Mar-2021                                                                                                                                                                                                                                                                                                                                                                                                                                                                                                                                                                                                                                                                                                                                                                                                                                                                                                                                                                                                                                                                                                                                                                                                                                                                                                                                                                                                                                                                                                                                                                                                                                                                                                                                                                           |
| Complete List of Authors:       | <p>Kjellberg, Anders; Karolinska Institutet, Physiology and Pharmacology; Karolinska University Hospital, Perioperative Medicine and Intensive Care</p> <p>Douglas, Johan; Blekinge Hospital Karlskrona, Department of Anaesthesia and Intensive Care</p> <p>Kraus, Michael; Bergmannsheil und Kinderklinik Buer GmbH, Klinik für Anästhesiologie und Intensivmedizin</p> <p>Pawlik, Michael; Caritas-Krankenhaus Sankt Josef Regensburg</p> <p>Oscarsson, Nicklas; University of Gothenburg Sahlgrenska Academy, Anesthesiology and Intensive Care</p> <p>Zheng, Xiaowei; Karolinska Institute, Department of Molecular Medicine and Surgery</p> <p>Bergman, Peter; Karolinska Institutet, Dept of Laboratory Medicine, Div of Clinical Microbiology</p> <p>Frånberg, Oskar; Blekinge Institute of Technology, Department of mathematics and natural science</p> <p>Kowalski, Jan; JK BIostatistics AB,</p> <p>Nyren, Sven; Karolinska University Hospital, Department of Radiology Solna; Karolinska Institute, Department of Molecular Medicine and Surgery</p> <p>Silvanus, Mårten; Blekinge Institute of Technology, TIMN; Swedish Armed Forces Diving and Naval Medicine Centre</p> <p>Skold, Magnus; Karolinska Institute, Respiratory Medicine; Karolinska University Hospital, Respiratory Medicine and Allergy</p> <p>Catrina, Sergiu; Karolinska Institute, Molecular Medicine and Surgery; Center for Diabetes, Academic Specialist Center, Stockholm,</p> <p>Rodriguez-Wallberg, Kenny; Karolinska Universitetssjukhuset, Department of Reproductive Medicine, Division of Gynecology and Reproduction; Karolinska Institutet, Department of Oncology-Pathology</p> <p>Lindholm, Peter; Karolinska Institute, Physiology and Pharmacology ; UCSD, Emergency Medicine</p> |
| <b>Primary Subject Heading</b>: | Infectious diseases                                                                                                                                                                                                                                                                                                                                                                                                                                                                                                                                                                                                                                                                                                                                                                                                                                                                                                                                                                                                                                                                                                                                                                                                                                                                                                                                                                                                                                                                                                                                                                                                                                                                                                                                                                   |
| Secondary Subject Heading:      | Immunology (including allergy), Intensive care, Emergency medicine                                                                                                                                                                                                                                                                                                                                                                                                                                                                                                                                                                                                                                                                                                                                                                                                                                                                                                                                                                                                                                                                                                                                                                                                                                                                                                                                                                                                                                                                                                                                                                                                                                                                                                                    |
| Keywords:                       | COVID-19, INTENSIVE & CRITICAL CARE, IMMUNOLOGY, INFECTIOUS                                                                                                                                                                                                                                                                                                                                                                                                                                                                                                                                                                                                                                                                                                                                                                                                                                                                                                                                                                                                                                                                                                                                                                                                                                                                                                                                                                                                                                                                                                                                                                                                                                                                                                                           |

1  
2  
3  
4  
5  
6  
7  
8  
9  
10  
11  
12  
13  
14  
15  
16  
17  
18  
19  
20  
21  
22  
23  
24  
25  
26  
27  
28  
29  
30  
31  
32  
33  
34  
35  
36  
37  
38  
39  
40  
41  
42  
43  
44  
45  
46  
47  
48  
49  
50  
51  
52  
53  
54  
55  
56  
57  
58  
59  
60

|  |                             |
|--|-----------------------------|
|  | DISEASES, THORACIC MEDICINE |
|  |                             |

SCHOLARONE™  
Manuscripts

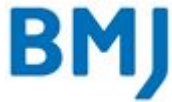

I, the Submitting Author has the right to grant and does grant on behalf of all authors of the Work (as defined in the below author licence), an exclusive licence and/or a non-exclusive licence for contributions from authors who are: i) UK Crown employees; ii) where BMJ has agreed a CC-BY licence shall apply, and/or iii) in accordance with the terms applicable for US Federal Government officers or employees acting as part of their official duties; on a worldwide, perpetual, irrevocable, royalty-free basis to BMJ Publishing Group Ltd ("BMJ") its licensees and where the relevant Journal is co-owned by BMJ to the co-owners of the Journal, to publish the Work in this journal and any other BMJ products and to exploit all rights, as set out in our [licence](#).

The Submitting Author accepts and understands that any supply made under these terms is made by BMJ to the Submitting Author unless you are acting as an employee on behalf of your employer or a postgraduate student of an affiliated institution which is paying any applicable article publishing charge ("APC") for Open Access articles. Where the Submitting Author wishes to make the Work available on an Open Access basis (and intends to pay the relevant APC), the terms of reuse of such Open Access shall be governed by a Creative Commons licence – details of these licences and which [Creative Commons](#) licence will apply to this Work are set out in our licence referred to above.

Other than as permitted in any relevant BMJ Author's Self Archiving Policies, I confirm this Work has not been accepted for publication elsewhere, is not being considered for publication elsewhere and does not duplicate material already published. I confirm all authors consent to publication of this Work and authorise the granting of this licence.

1  
2  
3 **1 COVID-19-HBO PROTOCOL**

4  
5  
6 **2 A Randomized, Controlled, Open Label, Multicentre Clinical Trial to explore Safety and**  
7 **3 Efficacy of Hyperbaric Oxygen for preventing ICU admission, Morbidity and Mortality in**  
8 **4 Adult Patients With COVID-19**  
9 **5**

10  
11 6 Anders Kjellberg MD<sup>1,2</sup>, Johan Douglas MD<sup>3</sup>, Michael Kraus MD, PhD<sup>4</sup>, Michael T. Pawlik MD,  
12 7 PhD<sup>5</sup>, Nicklas Oscarsson MD, PhD<sup>6</sup>, XiaoWei Zheng MD, PhD<sup>7</sup>, Peter Bergman MD, PhD<sup>8,9</sup>,  
13 8 Oskar Frånberg PhD<sup>10</sup>, Jan Kowalski<sup>11</sup>, Sven Nyrén MD, PhD<sup>7,12</sup>, Mårten Silvanus MSc<sup>10,13</sup>,  
14 9 Magnus Sköld MD, PhD<sup>14,15</sup>, Sergiu-Bogdan Catrina MD, PhD<sup>7,16</sup>, Kenny A. Rodriguez-  
15 10 Wallberg MD, PhD<sup>\*17,18</sup> and Peter Lindholm MD, PhD<sup>\*1,19</sup>

16  
17  
18  
19 11 \*= shared senior authorship.

- 20  
21  
22 13 1) Dept of Physiology and Pharmacology, Karolinska Institutet, Stockholm, Sweden.  
23 14 2) Perioperative Medicine and Intensive Care Medicine, Karolinska University Hospital,  
24 15 Stockholm, Sweden  
25 16 3) Dept of Anaesthesia and Intensive Care, Blekingesjukhuset, Karlskrona, Sweden  
26 17 4) Klinik für Anästhesiologie und Intensivmedizin Bergmannsheil und Kinderklinik Buer  
27 18 GmbH 45894 Gelsenkirchen, Germany  
28 19 5) Dept of Anaesthesiology, St. Josef Hospital, 93053 Regensburg, Germany  
29 20 6) Dept of Anaesthesia and Intensive Care, Göteborgs universitet, Sahlgrenska  
30 21 Akademin, Göteborg, Sweden  
31 22 7) Dept of Molecular Medicine and Surgery, Karolinska Institutet, Stockholm, Sweden  
32 23 8) Dept of Laboratory Medicine, Karolinska Institutet, Stockholm, Sweden  
33 24 9) Dept of Infectious Diseases, Karolinska University Hospital, Stockholm, Sweden  
34 25 10) Dept of Mathematics and natural sciences, Blekinge Institute of Technology,  
35 26 Karlskrona, Sweden  
36 27 11) JK Statistics AB, Stockholm, Sweden  
37 28 12) Dept Radiology Solna, Karolinska University Hospital, Stockholm, Sweden  
38 29 13) Swedish Armed Forces Diving and Naval Medicine Centre, Karlskrona, Sweden  
39 30 14) Respiratory Medicine Unit, Department of Medicine Solna and Center for Molecular  
40 31 Medicine, Karolinska Institutet, Stockholm, Sweden  
41 32 15) Dept of Respiratory Medicine and Allergy, Karolinska University Hospital, Stockholm,  
42 33 Sweden  
43 34 16) Center for Diabetes, Academic Specialist Center, Stockholm, Sweden  
44 35 17) Dept of Oncology and Pathology, Karolinska Institutet, Stockholm, Sweden  
45 36 18) Dept of Reproductive Medicine, Division of Gynaecology and Reproduction,  
46 37 Karolinska University Hospital, Stockholm, Sweden  
47 38 19) Dept of Emergency Medicine, University of California San Diego, La Jolla, CA, 92093,  
48 39 USA.  
49  
50  
51  
52  
53  
54  
55  
56  
57

58 43 **Corresponding Author** Anders Kjellberg, [anders.kjellberg@ki.se](mailto:anders.kjellberg@ki.se) ORCID ID: 0000-0002-4819-  
59 44 1024, Karolinska Institutet, FyFa, Biomedicum C3, 171 76 Stockholm, +46760657355  
60

1  
2  
3 45  
45  
6 46 **ABSTRACT**

7  
8 47 **Introduction** Corona virus disease 2019 (COVID-19) may cause severe pneumonitis and  
9  
10 48 trigger a massive inflammatory response that requires ventilatory support. The intensive  
11  
12 49 care unit (ICU)-mortality has been reported to be as high as 62%. Dexamethasone is the only  
13  
14 50 of all anti-inflammatory drugs that have been tested to date that has shown a positive effect  
15  
16 51 on mortality. We aim to explore if treatment with hyperbaric oxygen (HBO) is safe and  
17  
18 52 effective for patients with severe COVID-19. Our hypothesis is that HBO can prevent ICU  
19  
20 53 admission, morbidity and mortality by attenuating the inflammatory response. The primary  
21  
22 54 objective is to evaluate if HBO reduces the number of ICU admissions compared to best  
23  
24 55 practice treatment for COVID-19, main secondary objectives are to evaluate if HBO reduces  
25  
26 56 the load on ICU resources, morbidity and mortality and to evaluate if HBO mitigates the  
27  
28 57 inflammatory reaction in COVID-19.

29 58  
30  
31

32 59 **Methods and Analysis** A randomised, controlled, phase II, open label, multicentre trial. 200  
33  
34 60 subjects with severe COVID-19 and at least two risk factors for mortality will be included.  
35  
36 61 Baseline clinical data and blood samples will be collected before randomisation and  
37  
38 62 repeated daily for seven days, at day 14 and 30. Subjects will be randomised with a  
39  
40 63 computer-based system to HBO, maximum five times during the first seven days plus best  
41  
42 64 practice treatment or only best practice treatment. The primary endpoint, ICU admission, is  
43  
44 65 defined by criteria for selection for ICU. We will evaluate if HBO mitigates the inflammatory  
45  
46 66 reaction in COVID-19 using molecular analyses. All parameters are recorded in an electronic  
47  
48 67 case report form. An independent data safety monitoring board will review the safety  
49  
50 68 parameters.

51  
52 69 **Ethics and Dissemination** The trial is approved by The National Institutional Review Board in  
53  
54 70 Sweden (2020-01705) and the Swedish Medical Product Agency (5.1-2020-36673). Positive,  
55  
56 71 negative and any inconclusive results will be published in peer-reviewed scientific journals  
57  
58 72 with open access.

1  
2  
3 73 **Trial Registration** NCT04327505. EudraCT number: 2020-001349-37  
4  
5  
6 74  
7 75  
8 76  
9 77  
10 78

## 11 79 **STRENGTHS AND LIMITATIONS OF THIS STUDY**

### 12 80 **Strengths**

- 13 81 • Randomised controlled clinical trial in compliance with Good Clinical Practice
- 14 82 • Safety and efficacy endpoints together with multiple explanatory endpoints
- 15 83 • Independent Data Safety Monitoring Board

### 16 84 **Limitations**

- 17 85 • No placebo, open label
- 18 86 • Power calculation is based on early pandemic data and “best practice treatment”
- 19 87 have changed during the course of the trial.
- 20 88

## 21 89 **INTRODUCTION**

### 22 90 **Clinical manifestations and challenges with COVID-19**

23 91 Severe acute respiratory syndrome-coronavirus-2 (SARS-CoV-2) was first identified in China  
24 92 in December 2019.<sup>1</sup> The clinical infectious disease Corona virus disease 2019 (COVID-19)  
25 93 was declared a pandemic by the World Health Organization (WHO) on March 11, 2020; with  
26 94 more than 46 million confirmed cases and more than 1 million confirmed deaths by  
27 95 November 2, 2020.<sup>2</sup> Clinical experience from China and Italy was published early and even  
28 96 though the overall mortality is low (3.4%) the numbers from critical care were fearsome.<sup>3-6</sup>  
29 97 Mortality rates were as high as 90% in patients developing acute respiratory distress  
30 98 syndrome (ARDS) in early reports from Wuhan province. Later reports showed 28-day  
31 99 mortality rates of 61,5% in ICU patients with acute respiratory illness (Yang et al., 2020a) In  
32 100 a recent retrospective cohort study from Wuhan 19% of patients needed mechanical  
33 101 ventilation or extra corporal mechanical oxygenation (ECMO), 26% was admitted to ICU and  
34 102 hospital mortality rate was 28%.<sup>7</sup> SARS-CoV-2 enters human cells through Angiotensin  
35 103 Converting Enzyme 2 (ACE2) receptors, abundant in lungs, arteries, heart, kidney and  
36 104 intestines, causing a downstream activation of an inflammatory cascade that activates the  
37 105 innate immune system.<sup>8</sup> A synchronised immune response is vital in the control and  
38 106 resolution of viral infections. In some patients this activation and resolution is dysregulated,  
39 107 causing a disproportionate reaction, popularly called a cytokine storm.<sup>9</sup> Acute lung injury

1  
2  
3 108 (ALI) associated with COVID-19 differs from other described ARDS with rapidly progressing  
4  
5 109 respiratory failure and fibrosis. Even patients that have mild symptoms and survive COVID-  
6  
7 110 19 may have significant changes on pulmonary Computed Tomography (CT), with diffuse  
8  
9 111 ground glass opacities and crazy-paving pattern and consolidation suggesting severe  
10  
11 112 inflammatory involvement.<sup>10</sup> Despite enormous efforts, a definite cure seems far away and  
12  
13 113 there is urgent need for effective treatments to reduce morbidity and mortality. Remdesivir,  
14  
15 114 Hydroxychloroquine, Lopinavir, and Interferon- $\beta$ 1a has been tested in a total of 11,266  
16  
17 115 subjects included, none of the drugs have been proven effective according to recently  
18  
19 116 published results from the WHO Solidarity trial.<sup>11</sup> Corticosteroids were tried early in the  
20  
21 117 pandemic with discouraging results, but recently preliminary results from the RECOVERY-  
22  
23 118 trial showed some reduction in 28-day mortality with dexamethasone, with better effect in  
24  
25 119 severe disease.<sup>12</sup> The RECOVERY-trial showed a mortality of 41,4% in the control group vs  
26  
27 120 29,3% in the group that received Dexamethasone among patients that needed mechanical  
28  
29 121 ventilation.<sup>12</sup> A recent systemic overview on ARDS reported mortality rates since 2010:  
30  
31 122 Overall mortality rates of in-hospital- 45%, ICU- 38% and 28/30-day- 30%.<sup>13</sup>  
32

### 32 124 **Rationale for the study and explanation of the hypothesis**

33  
34 125 Macrophages, part of the innate immune system, have become major therapeutic targets in  
35  
36 126 ALI/ARDS. Macrophage activation is involved in the early phase of ARDS.<sup>14</sup> Alveolar  
37  
38 127 macrophages (AMs) are the gatekeepers of the innate immune system in the lungs.  
39  
40 128 Upon activation they secrete several inflammatory cytokines and chemokines including  
41  
42 129 Interleukin-1 beta (IL-1 $\beta$ ), Interleukin-6 (IL-6) and Tumor Necrosis Factor alpha (TNF- $\alpha$ ), to  
43  
44 130 attract T-helper1 (Th1)/T-helper 17 (Th17)-cells, new macrophages and neutrophils. AMs are  
45  
46 131 also responsible for clearing apoptotic neutrophils when the infection resolves. Proteomics  
47  
48 132 involved in the switch from inflammatory macrophage (M1) to resolving or anti-  
49  
50 133 inflammatory macrophage subtype (M2) was recently described in a human study of  
51  
52 134 ALI/ARDS.<sup>15</sup> Hypoxia Inducible factor-1 and 2 (HIF-1 and HIF-2) and inflammatory factors  
53  
54 135 such as signal transducer and activator of transcription 3 (STAT3) and nuclear factor kappa-  
55  
56 136 light-chain-enhancer of activated b-cells (NF $\kappa$ B) are important transcription factors involved  
57  
58 137 in macrophage polarisation. How and if it is possible to intervene with this intricate network  
59  
60 138 of redox signaling is not clear.<sup>16</sup> Hyperbaric oxygen (HBO) has been used for almost a

1  
2  
3 139 century, initially for decompression sickness (DCS), but it was soon noted that it had several  
4  
5 140 anti-inflammatory effects.<sup>17 18</sup> Recent evidence from animal studies suggest that HBO  
6  
7 141 ameliorate inflammation in DCS induced ALI through polarisation of macrophages from M1  
8  
9 142 to M2.<sup>19 20</sup> HBO has been shown to polarise macrophages from M1 to M2 associated with IL-  
10  
11 143 10 and thereby reduces inflammation,<sup>21 22</sup> and 30 min HBO ex vivo inhibit monocyte IL-1 $\beta$   
12  
13 144 and TNF- $\alpha$ .<sup>23</sup> Patients presenting to hospital with COVID-19 normally have almost a week of  
14  
15 145 mild or moderate flu-like symptoms but on admission often have an isolated hypoxic  
16  
17 146 respiratory failure. Many patients, despite severe hypoxemia do not have dyspnoea or  
18  
19 147 carbon dioxide retention suggesting a diffuse but moderate alveolar edema and a hypoxic  
20  
21 148 adaptation. Hypoxia is relative to the upregulation of adaptive mechanisms. When medical  
22  
23 149 oxygen is administered for a prolonged period the adaptive mechanisms are put out of play  
24  
25 150 and might aggravate oxidative stress. Hyperbaric oxygen will give patients a short burst of  
26  
27 151 oxidative stress and re-activate adaptive responses. The hypothesis of HBO as a safe and  
28  
29 152 effective treatment and possible mechanisms has been previously published.<sup>24-26</sup> Published  
30  
31 153 case series from China and the USA indicate that HBO in these patients may be safe and  
32  
33 154 beneficial<sup>27-30</sup>. A propensity-matched control study (n=20) from the USA showed 50% lower  
34  
35 155 mortality and almost two thirds less need for mechanical ventilation in the HBO treated  
36  
37 156 group.<sup>31</sup>  
38  
39 157 HBO has the potential to reduce inflammation, restore normal defence mechanisms and  
40  
41 158 thereby reduce morbidity and mortality in COVID-19 pneumonitis

40 159

#### 41 160 **Remaining gap of evidence**

42 161 HBO has been provided as “compassionate use” for Covid-19 and some evidence from small  
43  
44 162 case series and a prospective cohort suggests that it is safe and effective, but this needs to  
45  
46 163 be confirmed in randomised controlled trials. There are concerns regarding oxygen toxicity  
47  
48 164 in already inflamed lungs and the optimal dose and timing are still largely unknown. The  
49  
50 165 multiple explanatory outcome measures in our trial may answer some of these questions.  
51  
52 166 Here we report a summary of our protocol that adhere to International Council for  
53  
54 167 Harmonization- Good Clinical Practice (ICH-GCP) and Standard Protocol Items:  
55  
56 168 Recommendations for Interventional Trials (SPIRIT) guidelines,<sup>32</sup> version 4 2021-02-27 of  
57  
58 169 the protocol is available as supplementary file and substantial amendments will be available  
59  
60



1  
2  
3 170 on clinicaltrials.gov or by request from the corresponding author. The SPIRIT checklist refers  
4  
5 171 to the full protocol.  
6

7 172

### 8 173 **Hypothesis and Objectives**

9  
10 174 The overall hypothesis to be evaluated is that HBO reduce mortality, increase hypoxia  
11  
12 175 tolerance and prevent organ failure in patients with COVID19 pneumonitis by attenuating  
13  
14 176 the inflammatory response.

15  
16 177 The primary objective is to evaluate if HBO reduces the number of ICU admissions compared  
17  
18 178 to Best practice for COVID-19. Main secondary objectives are to evaluate if HBO reduces the  
19  
20 179 load on ICU resources, morbidity and mortality in severe cases of COVID-19 and to evaluate  
21  
22 180 if HBO mitigates the inflammatory reaction in COVID-19. Other secondary objectives (in  
23  
24 181 selection) is to evaluate if HBO is safe for SARS-CoV-2 positive patients and staff.  
25

26 182

### 27 183 **METHODS AND ANALYSIS**

#### 28 184 **Study Design**

29  
30 185 Randomised, controlled, phase II, open label, multicentre trial conducted at hospitals with  
31  
32 186 hyperbaric facility and intensive care unit. The trial will investigate the safety and efficacy of  
33  
34 187 HBO for COVID-19 but also multiple explanatory outcomes. The total number of participants  
35  
36 188 will be 200 (100 per group) with a subgroup of 20 subjects for explanatory endpoints where  
37  
38 189 we collect blood for extended immunology. Block randomisation will be performed,  
39  
40 190 stratified by gender and site. The trial consists of nine visits over 30 days after  
41  
42 191 randomisation, each visit consists of three parts; a) Review of medical records since last visit  
43  
44 192 and documentation in the electronic case report form (eCRF), b) Measurements and actions  
45  
46 193 to correct any deviations, c) HBO Treatment, if randomised (Visit 1-7 only) A flowchart of the  
47  
48 194 study design is depicted in *Figure 1.* and The Consolidated Standards of Reporting Trials  
49  
50 195 (CONSORT) flow chart of the trial is depicted in *Figure 2.*  
51

52 196

#### 53 197 **Setting and Study Subjects**

54  
55 198 The Sponsor is Karolinska Institutet, Sweden and presently three centres in Sweden and  
56  
57 199 Germany are involved. Adult patients with SARS-CoV-2 infection, with at least two risk  
58  
59 200 factors for increased mortality, likely to develop ARDS criteria and need intubation within 7  
60

201 days of admission to hospital will be screened. After information and signed informed  
 202 consent, study subjects will be checked for inclusion/exclusion criteria.  
 203 The inclusion/exclusion criteria are listed in *Table 1*.

204 Table 1 COVID-19-HBO Overview of inclusion and exclusion criteria

|                    |                                                                                                                                                                                                                                                                                                                                                                              |
|--------------------|------------------------------------------------------------------------------------------------------------------------------------------------------------------------------------------------------------------------------------------------------------------------------------------------------------------------------------------------------------------------------|
| Inclusion criteria | Aged 18-90 years                                                                                                                                                                                                                                                                                                                                                             |
|                    | PaO <sub>2</sub> /FiO <sub>2</sub> (PFI) below 200 mmHg (26.7 kPa) (based on ABG measurement)                                                                                                                                                                                                                                                                                |
|                    | Suspected or verified SARS-CoV-2 infection                                                                                                                                                                                                                                                                                                                                   |
|                    | At least two risk factors for increased morbidity/mortality <ul style="list-style-type: none"> <li>• Age above 50 years</li> <li>• Hypertension</li> <li>• Cardiovascular disease</li> <li>• Diabetes or pre-diabetes</li> <li>• Active or cured cancer</li> <li>• Asthma/COPD</li> <li>• Smoking</li> <li>• D-Dimer &gt; 1.0 mg/L</li> <li>• Auto-immune disease</li> </ul> |
| Exclusion Criteria | ARDS/pneumonia caused by other viral infections (positive for other virus)                                                                                                                                                                                                                                                                                                   |
|                    | ARDS/pneumonia caused by other non-viral infections or trauma                                                                                                                                                                                                                                                                                                                |
|                    | Known pregnancy or positive pregnancy test in women of childbearing age                                                                                                                                                                                                                                                                                                      |
|                    | Patients with previous CT verified lung fibrosis more than 10%                                                                                                                                                                                                                                                                                                               |
|                    | CT- or Spirometry-verified severe COPD with Emphysema                                                                                                                                                                                                                                                                                                                        |
|                    | Contraindication for HBO according to local guidelines#                                                                                                                                                                                                                                                                                                                      |
|                    | Not likely to need ICU admission within 7 days of screening (Subjective criteria that may exclude any patients that fulfil the other inclusion criteria but where the treating physician suspect a spontaneous recovery)                                                                                                                                                     |
|                    | Mental inability, reluctance or language difficulties that result in difficulty understanding the meaning of study participation                                                                                                                                                                                                                                             |
|                    | Prisoner                                                                                                                                                                                                                                                                                                                                                                     |
|                    | Unable/risk to move patient to Hyperbaric chamber                                                                                                                                                                                                                                                                                                                            |

1  
2  
3 205 # Contraindications are described in the Standard Operations Procedure (SOP) for each  
4  
5 206 center; generally, includes: Claustrophobia, Pneumothorax, Severe COPD  
6

### 7 207 **Randomisation**

8  
9 208 Subjects will be enrolled and randomised consecutively as they are found to be eligible for  
10  
11 209 inclusion in the study. HBO treatment will start within 24 hours of randomisation. Eligible  
12  
13 210 subjects will be randomised in a 1:1 allocation, stratified by site and gender in blocks  
14  
15 211 (blinded to all but the randomising clinical research associate at Karolinska Trial Alliance) to  
16  
17 212 either HBO or Control. The randomisation sequence is computer generated using  
18  
19 213 RANDOMIZE.NET.  
20

### 21 214 22 215 **Interventions**

23 216 HBO in addition to best practice compared with best practice  
24  
25 217 HBO: HBO 1.6-2.4 Atmospheres Absolute (ATA) for 30-60 min, maximum five treatments  
26  
27 218 first seven days  
28  
29 219 Control: Best practice treatment for COVID-19  
30  
31 220 The first HBO treatment will be given within 24 hours after inclusion. Patients with  
32  
33 221 respiratory symptoms admitted to the hospital will be informed and asked to participate.  
34  
35 222 The patients will be included once they fulfil the inclusion criteria and none of the exclusion  
36  
37 223 criteria, but the timing of the HBO treatment will depend on available resources.  
38

### 39 224 40 225 **Measurements**

41 226 After the patient has been informed about the study and if agreement to participate, an  
42  
43 227 informed consent form (ICF) will be signed off before any study specific procedures occur.  
44  
45 228 During the Screening, procedures to assure the patient's eligibility for the study  
46  
47 229 participation  
48  
49 230 will be performed. Females of childbearing potential will have a serum pregnancy test taken.  
50  
51 231 Demographics, medical history including COVID-19 specific history and review of routine  
52  
53 232 blood tests, secondary infections, viral load, radiology, concomitant medications before  
54  
55 233 inclusion will be recorded. Mean New early warning score (NEWS) for the past 24 hours  
56  
57 234 (three measurements 08, 14, 22 +/-2h) will be recorded if available (mean is calculated after  
58  
59 235 data is exported from eCRF at the end of Study). Baseline NEWS at inclusion will also be  
60

236 recorded. A physical examination will be performed and a HBO specific questionnaire as per  
 237 local routine will be obtained. Subject will be randomised to either HBO (in addition to best  
 238 practice) or best practice. Routine chemistry and study specific blood tests will be collected.  
 239 A complete list of procedures is listed in *Table 2*.

240 Table 2 COVID-19-HBO List of procedures

241 **Visit 1-7 is 08-07:59 and Visit 8 and 9 are 7 days 08-07:59**

| Activity                                          | Visit 1   | Visit 2 | Visit 3 | Visit 4 | Visit 5 | Visit 6 | Visit 7 | Visit 8 | Visit 9 |
|---------------------------------------------------|-----------|---------|---------|---------|---------|---------|---------|---------|---------|
| Day                                               | Day 1     | Day 2   | Day 3   | Day 4   | Day 5   | Day 6   | Day 7   | Day 14  | Day30   |
| Screening                                         | x         |         |         |         |         |         |         |         |         |
| Inclusion/exclusion criteria                      | x         |         |         |         |         |         |         |         |         |
| Pregnancy test if woman of childbearing age       | x         |         |         |         |         |         |         |         |         |
| HBO specific medical history/physical examination | x         |         |         |         |         |         |         |         |         |
| Signed Informed consent Form                      | x         |         |         |         |         |         |         |         |         |
| Randomisation                                     | x         |         |         |         |         |         |         |         |         |
| 1. Medical history                                | x         |         |         |         |         |         |         |         |         |
| 2. Demography*                                    | x         | x       | x       | x       | x       | x       | x       | x       | x       |
| 3. Concomitant medications                        | x         | x       | x       | x       | x       | x       | x       | x       | x       |
| 4. NEWS score                                     | x, x, x** | x, x, x | x, x, x | x, x, x | x, x, x | x, x, x | x, x, x | x, x, x | x, x, x |
| 5. Standard/ study specific biochemistry          | x         | x       | x       | x       | x       | x       | x       | x       | x       |
| 6. Study specific CBG/ABG                         | x, x, x** | x, x, x | x, x, x | x, x, x | x, x, x | x, x, x | x, x, x | x, x, x | x, x, x |
| 7. Plasma (microRNA)                              | x         | x       | x       | x       | x       | x       | x       | x       | x       |
| 8. CBG/ABG HBO                                    | 3x        | 3x      | 3x      | 3x      | 3x      | 3x      | 3x      |         |         |
| 9. HBO indicated/planned                          | x         | x       | x       | x       | x       | x       | x       |         |         |
| 10. HBO treatment                                 | x         | x       | x       | x       | x       | x       | x       |         |         |
| 11. AE                                            | x         | x       | x       | x       | x       | x       | x       | x       | x       |
| 12. ADR                                           | x         | x       | x       | x       | x       | x       | x       | x       | x       |
| 13. UPTD                                          | x         | x       | x       | x       | x       | x       | x       | x       | x       |
| 14. CPTD                                          | x         |         |         |         |         |         |         |         | x       |
| 15. ICU admission                                 |           | x       | x       | x       | x       | x       | x       | x       | x       |
| 16. Intubation/                                   |           | x       | x       | x       | x       | x       | x       | x       | x       |

|                                     |   |   |   |   |   |   |   |   |   |
|-------------------------------------|---|---|---|---|---|---|---|---|---|
| mechanical ventilation              |   |   |   |   |   |   |   |   |   |
| 17. ICU mortality                   |   | x | x | x | x | x | x | x | x |
| 18. Hospital mortality              |   | x | x | x | x | x | x | x | x |
| 19. Overall mortality               |   | x | x | x | x | x | x | x | x |
| 20. Secondary infections            | x | x | x | x | x | x | x | x | x |
| 21. Viral load                      | x | x | x | x | x | x | x | x | x |
| 22. Staff safety (Negative events)  | x | x | x | x | x | x | x | x | x |
| 23. Pulmonary CT (check records)    | x | x | x | x | x | x | x | x | x |
| 24. Chest X-ray (check records)     | x | x | x | x | x | x | x | x | x |
| 25. Chest Ultrasound (if available) | x | x | x | x | x | x | x | x | x |
| 26. Extended immunology (n=20)      | x |   |   | x |   |   | x | x | x |

242 \* Visit 2-9 Demography check only involves change in DNR status.

243 \*\* Depending on time of inclusion 1-3 samples/observations will be collected during visit 1  
 244 at the specified time points. Additionally, a baseline ABG (if not available from the patient's  
 245 medical records) and a baseline NEWS is collected.

246 CBG/ABG HBO is collected once daily for the first seven days and if clinically warranted.

247 All used acronyms and abbreviations are listed in the original protocol page 9-10

248 (Supplement)

249

250 **Trial endpoints**

251 The primary endpoint is the proportion of subjects admitted to ICU from day 1 to day 30  
 252 based on predefined criteria for ICU admission. Main secondary efficacy endpoints are 30-  
 253 day mortality, time to intubation, time to ICU admission and mean change in inflammatory  
 254 response and main safety endpoints are measurement of AE and serious adverse events  
 255 (SAE). A list of main efficacy and safety endpoints is listed in *Table 3*.

256 Table 3 COVID-19-HBO Trial endpoints

|                  |                                                                                                                                                                                                                                                                                                     |
|------------------|-----------------------------------------------------------------------------------------------------------------------------------------------------------------------------------------------------------------------------------------------------------------------------------------------------|
| Primary endpoint | The proportion of subjects admitted to ICU from day 1 to day 30, based on at least one of the following criteria:<br>I. Rapid progression over hours<br>II. Lack of improvement on high flow oxygen >40L/min or non-invasive ventilation with fraction of inspired oxygen (FiO <sub>2</sub> ) > 0.6 |
|------------------|-----------------------------------------------------------------------------------------------------------------------------------------------------------------------------------------------------------------------------------------------------------------------------------------------------|

|                                          |                                                                                                                                                                                                                                                                                                                                                                                                                                                                                                                                                                                                                                                                                                                                                                                                                                               |
|------------------------------------------|-----------------------------------------------------------------------------------------------------------------------------------------------------------------------------------------------------------------------------------------------------------------------------------------------------------------------------------------------------------------------------------------------------------------------------------------------------------------------------------------------------------------------------------------------------------------------------------------------------------------------------------------------------------------------------------------------------------------------------------------------------------------------------------------------------------------------------------------------|
|                                          | <p>III. Evolving Hypercapnia or increased work of breathing not responding to increased oxygen despite maximum standard of care available outside ICU</p> <p>IV. Hemodynamic instability or multi organ failure with maximum standard of care available outside ICU</p>                                                                                                                                                                                                                                                                                                                                                                                                                                                                                                                                                                       |
| Secondary endpoints                      | (in selection)                                                                                                                                                                                                                                                                                                                                                                                                                                                                                                                                                                                                                                                                                                                                                                                                                                |
| <i>Main Secondary Efficacy Endpoints</i> | <p>I. Proportion of subjects with 30-day mortality, all-cause mortality, from day 1 to day 30.</p> <p>II. Time-to-Intubation, i.e. cumulative days free of invasive mechanical ventilation, from day 1 to day 30</p> <p>III. Time-to-ICU, i.e. cumulative ICU free days, derived as the number of days from day 1 to ICU, where all ICU free subjects are censored at day 30.</p> <p>IV. Mean change in inflammatory response from day 1 to day 30.</p> <p>a. White cell count + differentiation</p> <p>b. Procalcitonin</p> <p>c. C-Reactive protein</p> <p>d. Cytokines (IL-6) (if available at local laboratory)</p> <p>e. Ferritin</p> <p>f. D-Dimer</p> <p>g. LDH</p> <p>VI. Overall Survival</p>                                                                                                                                        |
| <i>Safety Endpoints</i>                  | <p>I. The number of subjects, proportion of subjects and number of events of AE.</p> <p>II. The number of subjects, proportion of subjects and number of events of SAE</p> <p>III. The number of subjects, proportion of subjects and number of events of SADR.</p> <p>IV. Mean change in PaO<sub>2</sub>/FiO<sub>2</sub> before and after HBO compared to mean variance in PaO<sub>2</sub>/FiO<sub>2</sub> in the control group during day 1 to day 7.</p> <p>V. Mean change in NEWS before and after HBO compared to mean change in daily NEWS in the control group during day 1-day 7.</p> <p>VI. Number of negative events in staff associated with treatment of subject, (e.g. contact with aerosol from subject), number of events from day 1 to day 30 or last day in hospital if subject is discharged earlier, or at withdrawal.</p> |

257

258

### 259 **Safety and adverse events**

260 An independent Data Safety Monitoring Board (DSMB) will evaluate the safety data in the  
 261 context of the overall trial and the currently existing information about the study drug. The

1  
2  
3 262 DSMB is composed of 3 experts in their respective disciplines of medicine, clinical trial  
4  
5 263 methodology and conduct.  
6

7 264 The DSMB will review the data during the course of the study, a charter delineating their  
8  
9 265 guidelines for operating and stopping rules for terminating individual patients, a portion or all  
10  
11 266 of the trial prematurely, was drawn up before the trial started. The members of the DSMB,  
12  
13 267 meeting plan and responsibilities are specified in the original protocol (page 8, 42-43).  
14

15 268 The definition, handling, follow-up and reporting of adverse events are defined in the original  
16  
17 269 protocol (p.34-38)  
18

19 270  
20

### 21 271 **Statistical analysis**

22  
23 272 *Power calculation* The primary endpoint ICU admission is defined by criteria for selection for  
24  
25 273 ICU. We have assumed that 50% of the subjects will have at least one criterion during the  
26  
27 274 course of the study and we aim to reduce the ICU admission rate by 40%, i.e. to an ICU  
28  
29 275 admission rate of 30%. To achieve 80% power with type-I error rate of 0.05 (two-tailed) a  
30  
31 276 sample size of 93 subjects per group is required. We plan to enrol 200 subjects into this trial.  
32  
33 277 Interim analyses may decide to re-calculate sample-size for the trial.  
34

35 278 Sample size calculation was done in nQuery version 7.  
36

37 279  
38

39 280 Primary and secondary endpoints will be evaluated using the Intent-to-treat population (i.e.  
40  
41 281 all randomised subjects) and the primary endpoint also using the Per protocol population  
42  
43 282 (i.e. all randomised subjects with no major protocol violations). All randomised subjects will  
44  
45 283 be included in the safety population. The primary analysis of the primary endpoint will be  
46  
47 284 performed using the Cochran Mantel Haenszel test adjusting for randomisation strata site  
48  
49 285 and gender.  
50

51 286  
52

### 53 287 **Patient involvement**

54 288 The study design and consent form were discussed with and approved by a patient  
55  
56 289 representative. We thank Nanda Holm, patient contact at Rare diseases Sweden for her  
57  
58 290 support.  
59

60 291

## 292 **LIMITATIONS**

293 There current trial has limitations and there are several potential threats to the validity and  
294 generalisability of the results. First, due to the nature of the epidemic, available resources,  
295 the risk of transport and contamination it would be unethical and possibly unsafe to conduct  
296 a placebo-controlled trial. Second, “Best practice” have changed over the course of the  
297 pandemic and it may differ between different countries and centres. In the evaluation of  
298 safety and efficacy these aspects will be considered. Third, the sample size calculation and  
299 risk factors are based on early pandemic data. The rationale for 1:1 randomisation is that  
300 this is a new disease and we will use a slightly lower dose than often used in more stable  
301 patients without acute lung injury. Also, 1:1 allocation will maximise the statistical power. If  
302 the interim analysis can show supportive evidence for efficacy the trial committee/safety  
303 and data monitoring board may choose to change the randomisation to 2:1.

## 305 **ETHICS AND DISSEMINATION**

306 HBO has the potential to prevent COVID-19 infection developing into ARDS and multi organ  
307 failure and would then relieve ICU resources and potentially save lives. The nature of the  
308 disease with high mortality and no effective cure make the risk group a “vulnerable group”  
309 and it is important to make sure that the subjects are not unduly influenced by the  
310 expectation or benefits associated with participation. Therefore, the study will be carried  
311 out in compliance with ICH-GCP, respective national legislation and according to the  
312 Declaration of Helsinki. The National Institutional review board in Sweden  
313 (Etikprövningsmyndigheten, Dnr: 2020-01705 Application date 2020-03-27 and approval  
314 date 2020-04-29 (included a request for amendment 2020-04-23 and amended 2020-04-23).  
315 Approval by the Swedish Medical Product Agency (Läkemedelsverket) (LV: Application 2020-  
316 04-23 and decision 2020-05-08), Dnr 5.1-2020-36673. The trial was registered online prior to  
317 initiation on ClinicalTrials.gov (2020-03-31), NCT04327505 and on EU Clinical Trials Register  
318 (2020-05-08), EudraCT number: 2020-001349-37.

319 The trial is monitored by Karolinska Trial Alliance (KTA), an independent organisation before  
320 the trial started, during the trial conduct, and after the trial is completed, so as to ensure  
321 that the trial is carried out according to the protocol and that data is collected, documented,  
322 and reported according to ICH-GCP and applicable ethical and regulatory requirements.



1  
2  
3 323 Monitoring is performed as per the trial's monitoring plan and is intended to ensure that the  
4  
5 324 subject's rights, safety, and well-being are met as well as data in the eCRF are complete,  
6  
7 325 correct, and consistent with the source data. The monitoring will be performed by an  
8  
9 326 independent experienced monitor qualified in ICH-GCP, applicable national and  
10  
11 327 international regulations and the Declaration of Helsinki.

12  
13 328 Results will be disseminated at national and international conferences and then published in  
14  
15 329 international peer-reviewed scientific journals with open access. Positive, negative and any  
16  
17 330 inconclusive results will be published.

### 331 **CURRENT TRIAL STATUS**

332 The first site was initiated 20 May 2020, second site 29 November 2020. 22 subjects have  
333 been randomised. We are conducting the first safety analysis 16/3 when 20 subjects have  
334 completed the trial and the DSMB will review the report 13/4 2021. We are awaiting the  
335 third wave and plan to initiate more centers during 2021.

336

### 337 **AUTHORS' CONTRIBUTIONS**

338 AK is the coordinating investigator who wrote the hypothesis and developed most of the  
339 protocol together with PL (sponsor representative). AK and PL wrote the applications to  
340 Swedish IRB and MPA. KRW, JD, JK, MS, PB, NO, SN, OF, contributed with information to the  
341 protocol and IRB/MPA applications. JD is principal investigator at Blekingesjukhuset. MP is  
342 national coordinating investigator in Germany and principal investigator in Regensburg. MP  
343 is principal investigator in Gelsenkirchen. MK and MP wrote the German IRB and MPA  
344 applications with assistance of AK. All authors (also including XZ, MS and SC) contributed to  
345 the current submission and critically reviewed the manuscript. AK is corresponding author  
346 for this work, and attests that all listed authors meet authorship criteria and that no others  
347 meeting the criteria have been omitted.

348

### 349 **COMPETING INTERESTS**

350 Dr. Rodriguez-Wallberg reports grants from Vetenskapsrådet (Swedish Research Council),  
351 during the conduct of the study; all other authors declare that they have no known

1  
2  
3 352 competing financial interests or personal relationships that could have appeared to  
4  
5 353 influence the work reported in this paper.  
6

7 354

8  
9 355 **PATIENTS CONSENT**

10 356 Obtained, Written

11  
12 357

13  
14 358 **ETHICS APPROVAL**

15  
16 359 Sweden: Etikprövningsmyndigheten, Dnr: 2020-01705, Approved 2020-04-29

17  
18 360 Swedish Medical Product Agency (Läkemedelsverket), Dnr 5.1-2020-36673, approved 2020-  
19 361 05-08.

20  
21 362 Europe: EudraCT number: 2020-001349-37

22  
23 363

24  
25 364 **DATA SHARING**

26  
27 365 The full study protocol, statistical plan and consent form will be publicly available. Data will  
28  
29 366 be available on patient level; data will be pseudonymised, the full dataset and statistical  
30  
31 367 code will be available upon request. A full description of the intended use of the data must  
32  
33 368 be sent to the corresponding author for review and approval. Participant consent for data  
34  
35 369 sharing is conditioned and new ethics approval may be required.

36  
37 370

38 371 **ACKNOWLEDGEMENTS**

39  
40 372 We thank Georg Rinneberg, manager of the hyperbaric unit at Bergmannsheil und  
41  
42 373 Kinderklinik Buer, Gelsenkirchen for his help with organising the trial in Germany. Clinical  
43  
44 374 trial monitoring including conduct was done by Karolinska Trial Alliance, they also assisted  
45  
46 375 with writing the protocol, eCRF, Laboratory manual, DSMB charter and IRB submission.  
47  
48 376 Smart-Trial was used for creating the eCRF.

49 377

50  
51 378 **FUNDING**

52  
53 379 This work was supported by Vetenskapsrådet (KBF 2019-00446), made available by  
54  
55 380 redirecting funds to COVID-19 research originally awarded to Kenny Rodriguez-Wallberg.

56 381

57  
58 382 **REFERENCES**

59  
60

- 1  
2  
3 383 1. Yang Y, Peng F, Wang R, et al. The deadly coronaviruses: The 2003 SARS pandemic  
4 384 and the 2020 novel coronavirus epidemic in China. *J Autoimmun* 2020:102434. doi:  
5 385 10.1016/j.jaut.2020.102434 [published Online First: 2020/03/08]
- 6 386 2. (WHO) WHO. WHO Coronavirus Disease (COVID-19) Dashboard [web page]. 2020  
7 387 [updated 2020/11/02. Available from: <https://covid19.who.int/> accessed 11/02 2020.
- 8 388 3. Chen N, Zhou M, Dong X, et al. Epidemiological and clinical characteristics of 99 cases of  
9 389 2019 novel coronavirus pneumonia in Wuhan, China: a descriptive study. *Lancet*  
10 390 2020;395(10223):507-13. doi: 10.1016/S0140-6736(20)30211-7 [published Online  
11 391 First: 2020/02/03]
- 12 392 4. Yang J, Zheng Y, Gou X, et al. Prevalence of comorbidities in the novel Wuhan  
13 393 coronavirus (COVID-19) infection: a systematic review and meta-analysis. *Int J Infect*  
14 394 *Dis* 2020 doi: 10.1016/j.ijid.2020.03.017 [published Online First: 2020/03/17]
- 15 395 5. Arabi YM, Murthy S, Webb S. COVID-19: a novel coronavirus and a novel challenge for  
16 396 critical care. *Intensive care medicine* 2020 doi: 10.1007/s00134-020-05955-1  
17 397 [published Online First: 2020/03/04]
- 18 398 6. Grasselli G, Pesenti A, Cecconi M. Critical Care Utilization for the COVID-19 Outbreak in  
19 399 Lombardy, Italy: Early Experience and Forecast During an Emergency Response.  
20 400 *JAMA : the journal of the American Medical Association* 2020 doi:  
21 401 10.1001/jama.2020.4031 [published Online First: 2020/03/14]
- 22 402 7. Zhou F, Yu T, Du R, et al. Clinical course and risk factors for mortality of adult inpatients  
23 403 with COVID-19 in Wuhan, China: a retrospective cohort study. *Lancet*  
24 404 2020;395(10229):1054-62. doi: 10.1016/S0140-6736(20)30566-3 [published Online  
25 405 First: 2020/03/15]
- 26 406 8. Wang Q, Zhang Y, Wu L, et al. Structural and Functional Basis of SARS-CoV-2 Entry by  
27 407 Using Human ACE2. *Cell* 2020 doi: 10.1016/j.cell.2020.03.045 [published Online  
28 408 First: 2020/04/11]
- 29 409 9. Guo YR, Cao QD, Hong ZS, et al. The origin, transmission and clinical therapies on  
30 410 coronavirus disease 2019 (COVID-19) outbreak - an update on the status. *Mil Med*  
31 411 *Res* 2020;7(1):11. doi: 10.1186/s40779-020-00240-0 [published Online First:  
32 412 2020/03/15]
- 33 413 10. Pan F, Ye T, Sun P, et al. Time Course of Lung Changes On Chest CT During Recovery  
34 414 From 2019 Novel Coronavirus (COVID-19) Pneumonia. *Radiology* 2020:200370. doi:  
35 415 10.1148/radiol.2020200370 [published Online First: 2020/02/14]
- 36 416 11. Pan H, Peto R, Abdool Karim Q, et al. Repurposed antiviral drugs for COVID-19; interim  
37 417 WHO SOLIDARITY trial results. *medRxiv* 2020:2020.10.15.20209817. doi:  
38 418 10.1101/2020.10.15.20209817
- 39 419 12. Group RC, Horby P, Lim WS, et al. Dexamethasone in Hospitalized Patients with Covid-  
40 420 19 - Preliminary Report. *The New England journal of medicine* 2020 doi:  
41 421 10.1056/NEJMoa2021436 [published Online First: 2020/07/18]
- 42 422 13. Maca J, Jor O, Holub M, et al. Past and Present ARDS Mortality Rates: A Systematic  
43 423 Review. *Respiratory care* 2017;62(1):113-22. doi: 10.4187/respcare.04716  
44 424 [published Online First: 2016/11/03]
- 45 425 14. Sulkowski S, Sulkowska M, Giedrojć J, et al. Evaluation of the effect of macrophage  
46 426 system activation on the intensity degree of early destructive changes in acute  
47 427 enzymatic lung injury. *Rocz Akad Med Białymst* 1997;42 Suppl 1:412-21. [published  
48 428 Online First: 1997/01/01]
- 49 429 15. Dong H, Li J, Lv Y, et al. Comparative analysis of the alveolar macrophage proteome in  
50 430 ALI/ARDS patients between the exudative phase and recovery phase. *BMC Immunol*  
51 431 2013;14:25. doi: 10.1186/1471-2172-14-25 [published Online First: 2013/06/19]
- 52 432 16. Brune B, Dehne N, Grossmann N, et al. Redox control of inflammation in macrophages.  
53 433 *Antioxid Redox Signal* 2013;19(6):595-637. doi: 10.1089/ars.2012.4785 [published  
54 434 Online First: 2013/01/15]
- 55 435 17. Gill AL, Bell CN. Hyperbaric oxygen: its uses, mechanisms of action and outcomes. *QJM*  
56 436 2004;97(7):385-95.

- 1  
2  
3 437 18. Thom SR. Hyperbaric oxygen: its mechanisms and efficacy. *Plast Reconstr Surg*  
4 438 2011;127 Suppl 1:131S-41S. doi: 10.1097/PRS.0b013e3181f8e2bf [published Online  
5 439 First: 2011/01/14]
- 6 440 19. Han CH, Zhang PX, Xu WG, et al. Polarization of macrophages in the blood after  
7 441 decompression in mice. *Med Gas Res* 2017;7(4):236-40. doi: 10.4103/2045-  
8 442 9912.215749 [published Online First: 2018/03/03]
- 9 443 20. Geng M, Zhou L, Liu X, et al. Hyperbaric oxygen treatment reduced the lung injury of  
10 444 type II decompression sickness. *Int J Clin Exp Pathol* 2015;8(2):1797-803. [published  
11 445 Online First: 2015/05/15]
- 12 446 21. Buras JA, Holt D, Orlow D, et al. Hyperbaric oxygen protects from sepsis mortality via an  
13 447 interleukin-10-dependent mechanism. *Critical care medicine* 2006;34(10):2624-9.  
14 448 doi: 10.1097/01.CCM.0000239438.22758.E0
- 15 449 22. Oyaizu T, Enomoto M, Yamamoto N, et al. Hyperbaric oxygen reduces inflammation,  
16 450 oxygenates injured muscle, and regenerates skeletal muscle via macrophage and  
17 451 satellite cell activation. *Scientific reports* 2018;8(1):1288. doi: 10.1038/s41598-018-  
18 452 19670-x [published Online First: 2018/01/24]
- 19 453 23. Benson RM, Minter LM, Osborne BA, et al. Hyperbaric oxygen inhibits stimulus-induced  
20 454 proinflammatory cytokine synthesis by human blood-derived monocyte-  
21 455 macrophages. *Clin Exp Immunol* 2003;134(1):57-62.
- 22 456 24. Kjellberg A, De Maio A, Lindholm P. Can hyperbaric oxygen safely serve as an anti-  
23 457 inflammatory treatment for COVID-19? *Medical Hypotheses* 2020;144 doi:  
24 458 10.1016/j.mehy.2020.110224 [published Online First: 30 Aug]
- 25 459 25. De Maio A, Hightower LE. COVID-19, acute respiratory distress syndrome (ARDS), and  
26 460 hyperbaric oxygen therapy (HBOT): what is the link? *Cell Stress Chaperones* 2020:1-  
27 461 4. doi: 10.1007/s12192-020-01121-0 [published Online First: 2020/05/20]
- 28 462 26. Paganini M, Bosco G, Perozzo FAG, et al. The Role of Hyperbaric Oxygen Treatment for  
29 463 COVID-19: A Review. *Adv Exp Med Biol* 2020 doi: 10.1007/5584\_2020\_568  
30 464 [published Online First: 2020/07/23]
- 31 465 27. Guo D, Pan S, Wang M, et al. Hyperbaric oxygen therapy may be effective to improve  
32 466 hypoxemia in patients with severe COVID-2019 pneumonia: two case reports.  
33 467 *Undersea Hyperb Med* 2020;47(2):181-87. [published Online First: 2020/06/24]
- 34 468 28. Zhong XT, X; Tang, Y; Chen, R;. The effect of hyperbaric oxygen therapy on hypoxia in  
35 469 patients with severe new coronavirus pneumonia: the first report. *Chinese Journal of*  
36 470 *Nautical Medicine and Hyperbaric Medicine* 2020(27) doi: 10.3760 [published Online  
37 471 First: 2020-02-24]
- 38 472 29. Chen RT, Y; Zhong, X; Liang, Y; Li, B; Tao, X; Liao, B; . Efficacy analysis of hyperbaric  
39 473 oxygen therapy in the treatment of severe coronavirus disease 2019 patients. *Acad J*  
40 474 *Second Mil Med Univ* 2020;6(41):604-11.
- 41 475 30. Thibodeaux K, Speyrer M, Raza A, et al. Hyperbaric oxygen therapy in preventing  
42 476 mechanical ventilation in COVID-19 patients: a retrospective case series. *J Wound*  
43 477 *Care* 2020;29(Sup5a):S4-S8. doi: 10.12968/jowc.2020.29.Sup5a.S4 [published  
44 478 Online First: 2020/05/16]
- 45 479 31. Gorenstein SA, Castellano ML, Slone ES, et al. Hyperbaric oxygen therapy for COVID-  
46 480 19 patients with respiratory distress: treated cases versus propensity-matched  
47 481 controls. *Undersea Hyperb Med* 2020;47(3):405-13. [published Online First:  
48 482 2020/09/16]
- 49 483 32. Chan AW, Tetzlaff JM, Gotzsche PC, et al. SPIRIT 2013 explanation and elaboration:  
50 484 guidance for protocols of clinical trials. *Bmj* 2013;346:e7586. doi: 10.1136/bmj.e7586  
51 485 [published Online First: 2013/01/11]

52 486  
53 487 Legends:

54 488  
55 489 Figure 1. flowchart of the study design

56 490 Figure 2. The Consolidated Standards of Reporting Trials (CONSORT) flow chart of the trial

1  
2  
3  
4  
5  
6  
7  
8  
9  
10  
11  
12  
13  
14  
15  
16  
17  
18  
19  
20  
21  
22  
23  
24  
25  
26  
27  
28  
29  
30  
31  
32  
33  
34  
35  
36  
37  
38  
39  
40  
41  
42  
43  
44  
45  
46  
47  
48  
49  
50  
51  
52  
53  
54  
55  
56  
57  
58  
59  
60

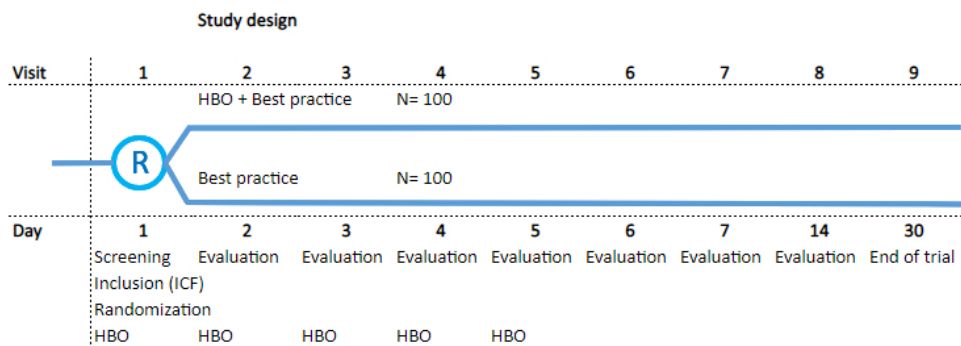

Treatments can be distributed differently depending on clinical effect and available resources.

**Study design**

## CONSORT Flow Diagram COVID-19-HBO

(CONSORT, Consolidated Standards of Reporting Trials)

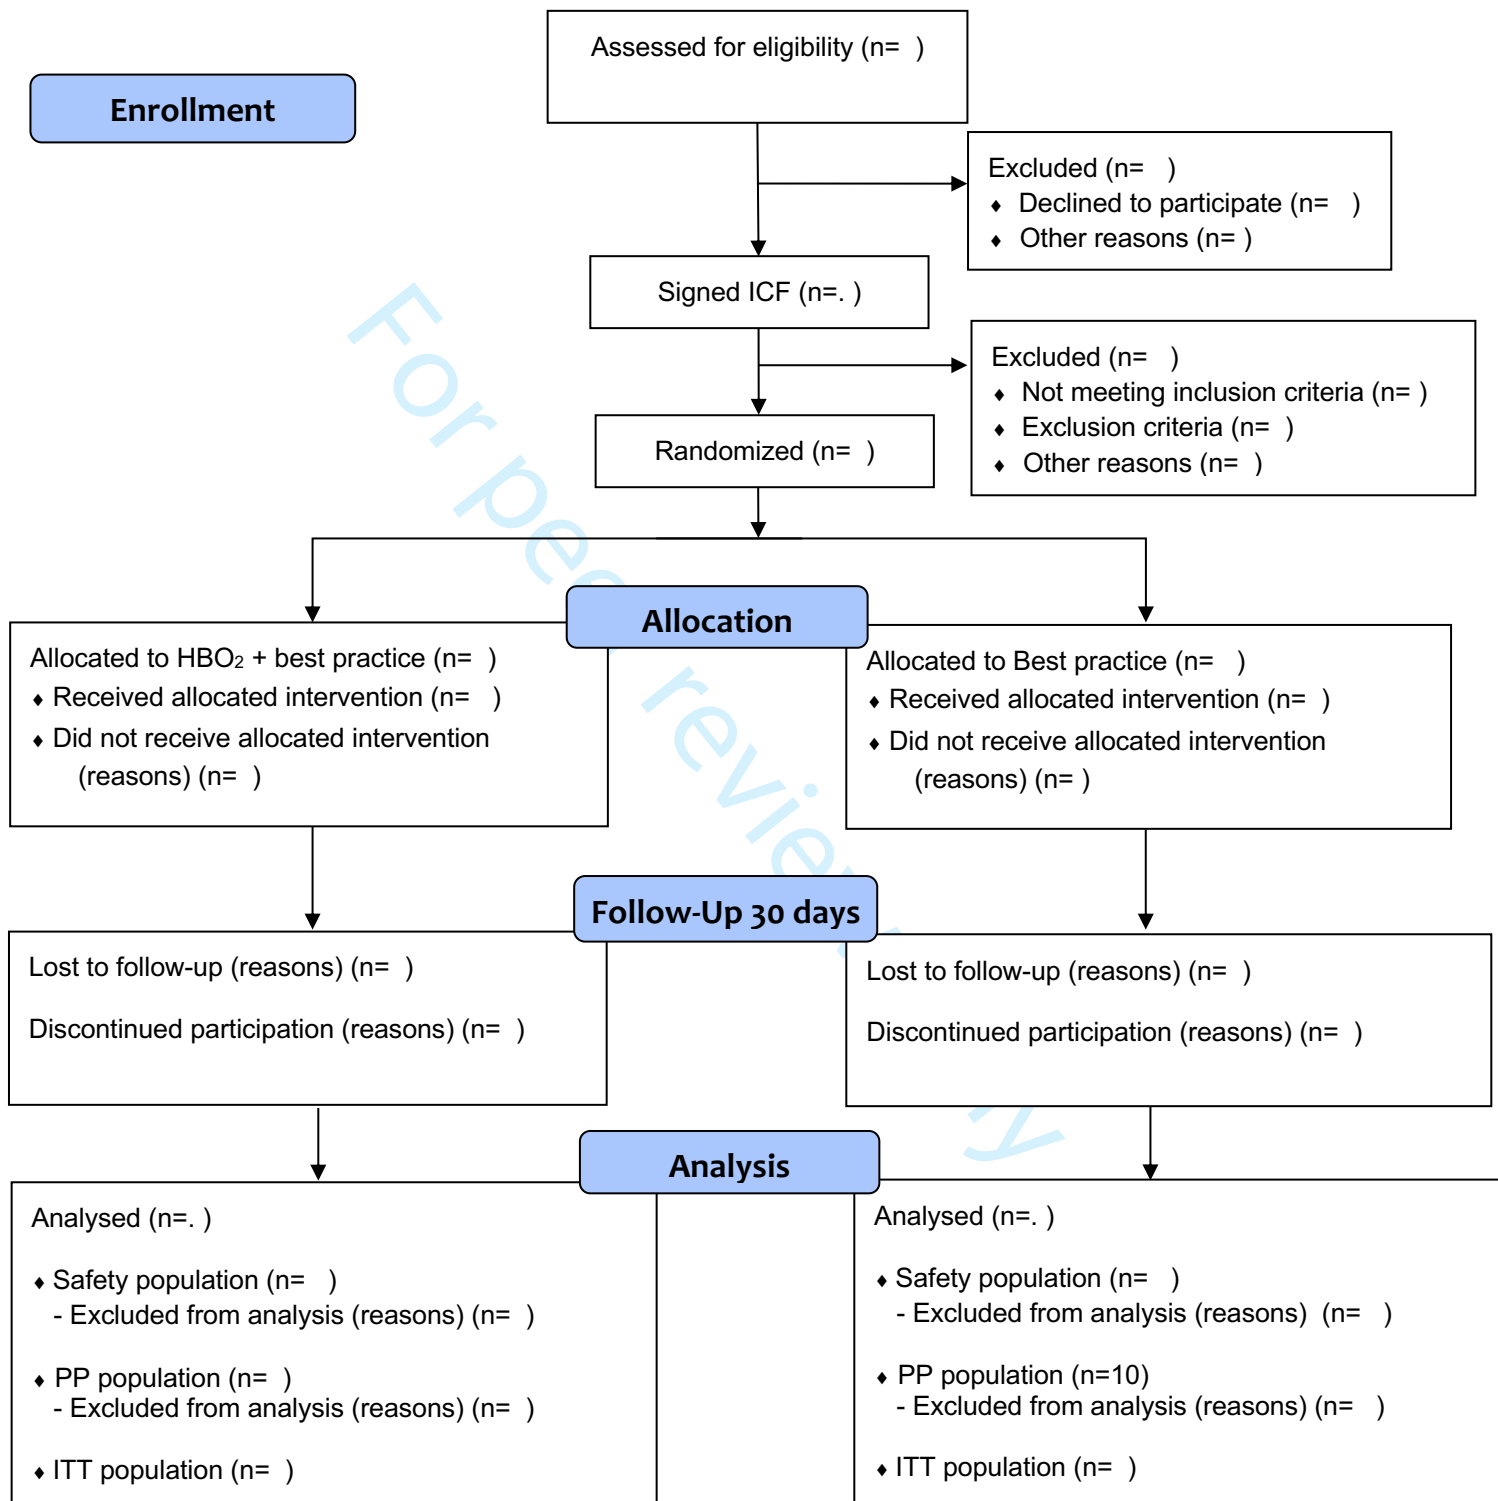

1  
2  
3  
4  
5  
6  
7  
8  
9  
10  
11  
12  
13  
14  
15  
16  
17  
18  
19  
20  
21  
22  
23  
24  
25  
26  
27  
28  
29  
30  
31  
32  
33  
34  
35  
36  
37  
38  
39  
40  
41  
42  
43  
44  
45  
46  
47  
48  
49  
50  
51  
52  
53  
54  
55  
56  
57  
58  
59  
60

Study Code: COVID-19-HBO  
Version No: v.4  
Date: 2021-02-27  
EudraCT No: 2020-001349-37

## CLINICAL STUDY PROTOCOL

---

# **A Randomized, Controlled, Open Label, Multicentre Clinical Trial to explore Safety and Efficacy of Hyperbaric Oxygen for preventing ICU admission, Morbidity and Mortality in Adult Patients With COVID-19**

Safety and Efficacy of Hyperbaric oxygen for ARDS in patients with COVID-19

---

Study code: COVID-19-HBO  
EudraCT number: 2020-001349-37  
ClinicalTrials.gov Identifier: NCT04327505  
Version number: 4  
Date: 2021-02-27  
Sponsor: Karolinska Institutet, Solna  
Coordinating Investigator: Anders Kjellberg, MD

---

Study Code: COVID-19-HBO  
 Version No: v.4  
 Date: 2021-02-27  
 EudraCT No: 2020-001349-37

## Table of Contents

|                                                                     |    |
|---------------------------------------------------------------------|----|
| Signature page .....                                                | 5  |
| Contact information .....                                           | 7  |
| List of used acronyms and abbreviations .....                       | 9  |
| 1. Synopsis.....                                                    | 11 |
| 2. Background and Rationale.....                                    | 14 |
| 2.1 Clinical manifestations and challenges with COVID-19 .....      | 14 |
| 2.2 Rationale for the study and explanation of the hypothesis.....  | 15 |
| 3. Benefit-risk evaluation .....                                    | 16 |
| 3.1 The risk group .....                                            | 16 |
| 3.2 General risks with HBO and oxygen toxicity .....                | 17 |
| 3.3 Blood sampling.....                                             | 17 |
| 3.4 Handling of sensitive personal data .....                       | 17 |
| 3.5 Safety and logistics .....                                      | 18 |
| 4. Study objectives .....                                           | 18 |
| 4.1 Primary objective.....                                          | 19 |
| 4.2 Secondary objective(s).....                                     | 19 |
| 4.2.1 Main secondary objective .....                                | 19 |
| 4.2.2 Other secondary objectives .....                              | 19 |
| 4.3 Primary endpoint:.....                                          | 19 |
| 4.4 Secondary endpoints: .....                                      | 20 |
| 4.4.1.2 Other Efficacy Endpoints.....                               | 20 |
| 5. Study design and procedures.....                                 | 21 |
| 5.1 Overall Study design .....                                      | 21 |
| 5.2 Procedures and flow chart .....                                 | 22 |
| 5.2.1 Study schedule .....                                          | 22 |
| 5.2.2 Assessments and procedures.....                               | 24 |
| 5.3 Biological sampling procedures .....                            | 30 |
| 5.3.1 Handling, storage, and destruction of biological samples..... | 30 |
| 5.3.2 Total volume of blood per subject.....                        | 30 |
| 5.3.3 Biobank.....                                                  | 30 |
| 5.3 End of Study.....                                               | 31 |
| 6. Subject selection .....                                          | 31 |



Study Code: COVID-19-HBO  
 Version No: v.4  
 Date: 2021-02-27  
 EudraCT No: 2020-001349-37

|    |       |                                                                           |
|----|-------|---------------------------------------------------------------------------|
| 1  |       |                                                                           |
| 2  |       |                                                                           |
| 3  |       |                                                                           |
| 4  |       |                                                                           |
| 5  |       |                                                                           |
| 6  | 6.1   | Inclusion criteria: ..... 31                                              |
| 7  | 6.2   | Exclusion criteria: ..... 32                                              |
| 8  | 6.3   | Screening ..... 32                                                        |
| 9  | 6.4   | Withdrawal Criteria ..... 32                                              |
| 10 | 7.    | Study treatments ..... 33                                                 |
| 11 | 7.1   | Description of investigational product(s) ..... 33                        |
| 12 | 7.2   | Dose and administration ..... 34                                          |
| 13 | 7.3   | Packaging, labeling, and handling of investigational products(s)..... 34  |
| 14 | 7.4   | Drug accountability and treatment compliance ..... 34                     |
| 15 | 7.5   | Randomization ..... 34                                                    |
| 16 | 7.6   | Concomitant Medication..... 35                                            |
| 17 | 7.7   | Treatment after study end ..... 35                                        |
| 18 | 8.    | Handling of Adverse Events ..... 35                                       |
| 19 | 8.1   | Definitions ..... 35                                                      |
| 20 | 8.1.1 | Adverse Event (AE) ..... 35                                               |
| 21 | 8.1.2 | Adverse Reaction (AR) ..... 35                                            |
| 22 | 8.1.3 | Serious Adverse Event (SAE)..... 35                                       |
| 23 | 8.1.4 | Suspected Unexpected Serious Adverse Reaction (SUSAR) ..... 36            |
| 24 | 8.2   | Assessment of Adverse Events ..... 36                                     |
| 25 | 8.2.1 | Assessment of causal relationship..... 36                                 |
| 26 | 8.2.2 | Assessment of intensity ..... 37                                          |
| 27 | 8.2.3 | Assessment of seriousness ..... 37                                        |
| 28 | 8.3   | Reporting and registration of Adverse Events..... 37                      |
| 29 | 8.3.1 | Reporting of Adverse Events (AE)..... 38                                  |
| 30 | 8.3.2 | Reporting of Serious Adverse Events (SAE) ..... 38                        |
| 31 | 8.3.3 | Reporting of Suspected Unexpected Serious Adverse Reactions (SUSAR)... 38 |
| 32 | 8.4   | Follow-up of Adverse Events ..... 38                                      |
| 33 | 8.5   | Safety Report (Development Safety Update Report, DSUR)..... 39            |
| 34 | 8.6   | Procedures in case of emergencies..... 39                                 |
| 35 | 8.7   | Reference Safety Information ..... 39                                     |
| 36 | 9.    | Statistics ..... 39                                                       |
| 37 | 9.1   | Statistical Analysis Plan ..... 39                                        |
| 38 | 9.1.1 | Analysis population ..... 40                                              |
| 39 |       |                                                                           |
| 40 |       |                                                                           |
| 41 |       |                                                                           |
| 42 |       |                                                                           |
| 43 |       |                                                                           |
| 44 |       |                                                                           |
| 45 |       |                                                                           |
| 46 |       |                                                                           |
| 47 |       |                                                                           |
| 48 |       |                                                                           |
| 49 |       |                                                                           |
| 50 |       |                                                                           |
| 51 |       |                                                                           |
| 52 |       |                                                                           |
| 53 |       |                                                                           |
| 54 |       |                                                                           |
| 55 |       |                                                                           |
| 56 |       |                                                                           |
| 57 |       |                                                                           |
| 58 |       |                                                                           |
| 59 |       |                                                                           |
| 60 |       |                                                                           |

Study Code: COVID-19-HBO  
 Version No: v.4  
 Date: 2021-02-27  
 EudraCT No: 2020-001349-37

|       |                                                                   |    |
|-------|-------------------------------------------------------------------|----|
| 9.2   | Statistical analyses.....                                         | 40 |
| 9.2.1 | Sample size calculations.....                                     | 40 |
| 9.2.2 | General statistical methodology.....                              | 40 |
| 9.2.3 | Patient Demographic and Baseline Characteristics.....             | 41 |
| 9.2.4 | Primary Endpoint Analysis.....                                    | 41 |
| 9.2.5 | Secondary Endpoints Analysis.....                                 | 41 |
| 9.2.6 | Safety analyses.....                                              | 41 |
| 9.2.7 | Interim Analysis.....                                             | 42 |
| 10.   | Quality Control and Quality Assurance.....                        | 42 |
| 10.1  | Quality Assurance and Sponsor oversight.....                      | 42 |
| 10.2  | Monitoring.....                                                   | 43 |
| 10.3  | Source data.....                                                  | 43 |
| 10.4  | Deviations or serious breaches.....                               | 43 |
| 10.5  | Audits and inspections.....                                       | 43 |
| 10.6  | Data Safety Monitoring Board.....                                 | 44 |
| 10.7  | Data protection.....                                              | 44 |
| 11.   | Ethics.....                                                       | 45 |
| 11.1  | Compliance to the protocol, GCP and regulations.....              | 45 |
| 11.2  | Ethical review of the study.....                                  | 45 |
| 11.3  | Procedure for obtaining informed consent.....                     | 45 |
| 12.   | Insurances.....                                                   | 46 |
| 13.   | Substantial changes to the study.....                             | 46 |
| 14.   | Collection, handling and archiving data.....                      | 46 |
| 14.1  | Case Report Form.....                                             | 46 |
| 15.   | Notification of study completion, reporting, and publication..... | 47 |
| 16.   | References.....                                                   | 47 |
| 17.   | Amendments and Administrative changes.....                        | 50 |

1 Study Code: COVID-19-HBO  
2 Version No: v.4  
3 Date: 2021-02-27  
4 EudraCT No: 2020-001349-37  
5  
6  
7

## 8 Signature page

### 9 Sponsor

10 I am responsible for ensuring that this protocol includes all essential information to be able to  
11 conduct this study. I will submit the protocol and all other important study-related information  
12 to the responsible investigator(s) so that they can conduct the study correctly. I am aware that  
13 it is my responsibility to hold the staff members who work with this study informed and trained.  
14

15 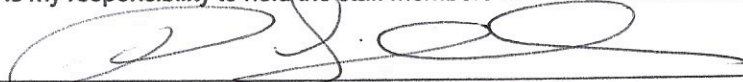  
16 \_\_\_\_\_ 2021-03-01  
17 Sponsor's representative signature Date

18  
19 Peter Lindholm, MD, PhD

20  
21 \_\_\_\_\_  
22 Printed name

### 23 Coordinating Investigator

24 I have read this protocol and agree that it includes all essential information to be able to  
25 conduct the study. By signing my name below, I agree to conduct the study in compliance with  
26 this protocol, the Declaration of Helsinki, ICH GCP (Good Clinical Practice) guidelines and the  
27 current national and international regulations governing the conduct of this clinical trial.  
28

29 I will submit this protocol and all other important study-related information to the staff members  
30 and investigators who participate in this study, so that they can conduct the study correctly. I  
31 am aware of my responsibility to continuously keep the staff members and investigators who  
32 work with this study informed and trained.  
33

34 I am aware that quality control of this study will be performed in the form of monitoring, audit,  
35 and possibly inspection.  
36

37 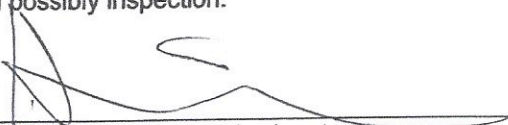  
38 \_\_\_\_\_ 2021-03-01  
39 Coordinating Investigator's signature Date

40  
41 Anders Kjellberg, MD

42  
43 \_\_\_\_\_  
44 Printed name  
45  
46  
47  
48  
49  
50  
51  
52  
53  
54  
55  
56  
57  
58  
59  
60

1 Study Code: COVID-19-HBO  
2 Version No: v.4  
3 Date: 2021-02-27  
4 EudraCT No: 2020-001349-37  
5  
6  
7  
8  
9

10 **Principal Investigator**

11 I have read this protocol and agree that it includes all essential information to be able to  
12 conduct the study. By signing my name below, I agree to conduct the study in compliance with  
13 this protocol, the Declaration of Helsinki, ICH GCP (Good Clinical Practice) guidelines and the  
14 current national and international regulations governing the conduct of this clinical trial.  
15

16  
17 I will submit this protocol and all other important study-related information to the staff members  
18 and investigators who participate in this study, so that they can conduct the study correctly. I  
19 am aware of my responsibility to continuously keep the staff members and investigators who  
20 work with this study informed and trained.  
21

22  
23 I am aware that quality control of this study will be performed in the form of monitoring, audit,  
24 and possibly inspection.  
25

26  
27   
28 \_\_\_\_\_  
29 Principal Investigator's signature

2021-03-01

\_\_\_\_\_  
Date

30 ANDERS KJELLBERG  
31 \_\_\_\_\_  
32 Printed name  
33  
34  
35  
36  
37  
38  
39  
40  
41  
42  
43  
44  
45  
46  
47  
48  
49  
50  
51  
52  
53  
54  
55  
56  
57  
58  
59  
60

Study Code: COVID-19-HBO  
 Version No: v.4  
 Date: 2021-02-27  
 EudraCT No: 2020-001349-37

## Contact information

| Role                                                                                                   |                                                                                                                                                                                                                                                                                                                                                                |
|--------------------------------------------------------------------------------------------------------|----------------------------------------------------------------------------------------------------------------------------------------------------------------------------------------------------------------------------------------------------------------------------------------------------------------------------------------------------------------|
| Sponsor                                                                                                | Karolinska Institutet<br><br>Sponsor representative:<br>Peter Lindholm, MD, PhD<br>Hyperbaric Medicine,<br>Dept. Physiology and Pharmacology<br>Karolinska Institutet<br>171 77 Stockholm<br>+46730621184<br><a href="mailto:peter.lindholm@ki.se">peter.lindholm@ki.se</a>                                                                                    |
| Coordinating Investigator Karolinska Institutet/ Principal Investigator Karolinska University Hospital | Anders Kjellberg, MD, PhD student,<br>ICU Consultant, head of hyperbaric unit,<br>Perioperative Medicine och Intensive Care<br>Karolinska University Hospital/<br>Hyperbaric Medicine<br>Dept. Physiology and Pharmacology<br>Karolinska Institutet<br>171 77 Stockholm<br>+468760657355<br><a href="mailto:anders.kjellberg@ki.se">anders.kjellberg@ki.se</a> |
| Principal investigator Blekingesjukhuset, Karlskrona                                                   | Johan Douglas, MD<br>Anestesikliniken<br>Blekingesjukhuset<br>Karlskrona<br>+46708123223<br><a href="mailto:j@douglas.nu">j@douglas.nu</a>                                                                                                                                                                                                                     |
| National Coordinating Investigator Germany/ Principal Investigator St. Josef, Regensburg               | Michael Pawlik, MD, PhD<br>Klinik für Anästhesiologie, Krankenhaus St.Josef<br>93053 Regensburg<br>+499417823610<br><a href="mailto:mpawlik@caritasstjosef.de">mpawlik@caritasstjosef.de</a>                                                                                                                                                                   |
| Principal Investigator Sahlgrenska University Hospital                                                 | Louise Sameby, MD<br>Department of Anesthesia and Intensive Care,<br>Hyperbaric Medicine<br><a href="mailto:louise.sameby@vgregion.se">louise.sameby@vgregion.se</a>                                                                                                                                                                                           |
| Trial sites                                                                                            | Blekingesjukhuset Karlskrona, SE<br>Karolinska University Hospital, SE<br>Sahlgrenska University Hospital, SE<br>Krankenhaus St.Josef, Regensburg, DE                                                                                                                                                                                                          |

Study Code: COVID-19-HBO  
 Version No: v.4  
 Date: 2021-02-27  
 EudraCT No: 2020-001349-37

| Role                                     |                                                                                                                                                                                                                                    |
|------------------------------------------|------------------------------------------------------------------------------------------------------------------------------------------------------------------------------------------------------------------------------------|
|                                          | Bergmannsheil und Kinderklinik Buer, DE                                                                                                                                                                                            |
| Clinical monitoring organization, Sweden | Karolinska Trial Alliance, KTA Support<br>Karolinska University Hospital Sabbatsbergs sjukhus<br>Olivecronas väg 15<br>113 61 Stockholm, Sweden                                                                                    |
| Senior Biostatistician                   | Jan Kowalski<br>JK Biostatistics AB<br>Karlbergsvägen 74<br>113 35 Stockholm, Sweden                                                                                                                                               |
| Data Safety Monitoring Board             | Magnus Nord, MD, PhD, Professor, Astra Zeneca<br>Miklos Lipcsey, MD, PhD, Professor, Uppsala University Hospital<br>Anders Öwall, MD, PhD, Ass. Professor/ Senior Consultant Karolinska Institutet/ Karolinska University Hospital |

Study Code: COVID-19-HBO  
 Version No: v.4  
 Date: 2021-02-27  
 EudraCT No: 2020-001349-37

## List of used acronyms and abbreviations

| Abbreviation | Term/Explanation                                                                                                            |
|--------------|-----------------------------------------------------------------------------------------------------------------------------|
| ABG          | Arterial Blood Gas                                                                                                          |
| AE           | Adverse Event = any untoward medical occurrence                                                                             |
| ALI          | Acute Lung Injury                                                                                                           |
| ANCOVA       | Analysis of Covariance                                                                                                      |
| AR           | Adverse Reaction = adverse event, that is each unfavorable and unexpected reaction to a study treatment, regardless of dose |
| ARDS         | Acute Respiratory Distress Syndrome                                                                                         |
| ATA          | Atmosphere Absolute (pressure) 1ATA=101.3kPa                                                                                |
| CBG          | Capillary Blood Gas                                                                                                         |
| COPD         | Chronic Obstructive Pulmonary Disease                                                                                       |
| COVID-19     | Corona Virus Disease 2019                                                                                                   |
| CPTD         | Cumulative Pulmonary Toxicity Dose                                                                                          |
| CRA          | Clinical Research Associate                                                                                                 |
| CRF          | Case Report Form                                                                                                            |
| CRO          | Contract Research Organization                                                                                              |
| CRRT         | Continuous Renal Replacement Therapy                                                                                        |
| CT           | Computerized Tomography                                                                                                     |
| CXR          | Chest X-Ray                                                                                                                 |
| DNR          | Do Not Resuscitate                                                                                                          |
| DSMB         | Data Safety Monitoring Board                                                                                                |
| DSUR         | Development Safety Update Report = annual safety report                                                                     |
| ECG          | Electrocardiogram                                                                                                           |
| ECMO         | Extra-Corporal Membrane Oxygenation                                                                                         |
| EPM          | Etikprövningsmyndigheten (English: Swedish Ethical Review Authority)                                                        |
| FAS          | Full Analys Set                                                                                                             |
| GCP          | Good Clinical Practice                                                                                                      |
| ICF          | Informed Consent Form                                                                                                       |
| ICH          | International Council for Harmonization                                                                                     |
| ICU          | Intensive Care Unit                                                                                                         |
| IEC          | Independent Ethics Committee                                                                                                |
| IHD          | Intermittent Hemo-Dialysis                                                                                                  |
| IL-          | Interleukin-                                                                                                                |
| IRB          | Institutional Review Board                                                                                                  |
| ITT          | Intention-to-treat = including all data from all subjects who have participated in the study                                |
| HBO          | Hyperbaric Oxygen                                                                                                           |
| HIF          | Hypoxia Inducible Factor                                                                                                    |
| LUS          | Lung Ultrasound                                                                                                             |

Study Code: COVID-19-HBO  
 Version No: v.4  
 Date: 2021-02-27  
 EudraCT No: 2020-001349-37

|                                    |                                                                                                                                                                         |
|------------------------------------|-------------------------------------------------------------------------------------------------------------------------------------------------------------------------|
| LVFS                               | Läkemedelsverkets författningssamling (English: Swedish Medical Products Agency's statutes)                                                                             |
| M1                                 | Macrophage phenotype 1; inflammatory                                                                                                                                    |
| M2                                 | Macrophage phenotype 2; anti-inflammatory                                                                                                                               |
| miR-210                            | MicroRNA 210                                                                                                                                                            |
| miR-34a                            | MicroRNA 34a                                                                                                                                                            |
| MPA                                | Medical Products Agency                                                                                                                                                 |
| NEWS                               | National Early Warning Score                                                                                                                                            |
| PBMC                               | Peripheral Blood Mononuclear Cells                                                                                                                                      |
| PE                                 | Pulmonary Embolism                                                                                                                                                      |
| PACO <sub>2</sub>                  | Partial pressure of carbon dioxide in alveoli                                                                                                                           |
| PAH <sub>2</sub> O                 | Partial pressure of water vapor in alveoli                                                                                                                              |
| PAO <sub>2</sub>                   | Partial pressure of oxygen in alveoli                                                                                                                                   |
| PaO <sub>2</sub> /FiO <sub>2</sub> | Partial pressure of oxygen in arterial blood/Fraction of inspired oxygen                                                                                                |
| PFI                                | PaO <sub>2</sub> /FiO <sub>2</sub> = partial pressure of oxygen in arterial blood/Fraction of inspired oxygen                                                           |
| PP                                 | Per Protocol analysis = including only data from subjects who have completed the study completely in accordance with the protocol, with no deviations from the protocol |
| PPS                                | Per Protocol Set                                                                                                                                                        |
| RNA                                | Ribonucleic acid                                                                                                                                                        |
| SAE                                | Serious Adverse Event = serious untoward medical occurrence                                                                                                             |
| SAP                                | Statistical Analysis Plan                                                                                                                                               |
| SPC or SmPC                        | Summary of Product Characteristics                                                                                                                                      |
| SUSAR                              | Suspected Unexpected Serious Adverse Reaction                                                                                                                           |
| SARS-CoV-2                         | Severe acute respiratory syndrome coronavirus 2                                                                                                                         |
| SOP                                | Standard Operation Procedure                                                                                                                                            |
| SpO <sub>2</sub>                   | peripheral Oxygen Saturation                                                                                                                                            |
| TNF $\alpha$                       | Tumor Necrosis Factor alpha                                                                                                                                             |
| UPTD                               | Units of oxygen Pulmonary Toxicity Dose                                                                                                                                 |
|                                    |                                                                                                                                                                         |
|                                    |                                                                                                                                                                         |



Study Code: COVID-19-HBO  
 Version No: v.4  
 Date: 2021-02-27  
 EudraCT No: 2020-001349-37

## 1. Synopsis

|                                     |                                                                                                                                                                                                                                                                                                                                                                                                                                                                                                                                                                                                                                                           |
|-------------------------------------|-----------------------------------------------------------------------------------------------------------------------------------------------------------------------------------------------------------------------------------------------------------------------------------------------------------------------------------------------------------------------------------------------------------------------------------------------------------------------------------------------------------------------------------------------------------------------------------------------------------------------------------------------------------|
| EudraCT number:                     | 2020-001349-37                                                                                                                                                                                                                                                                                                                                                                                                                                                                                                                                                                                                                                            |
| Title:                              | A Randomized, Controlled, Open Label, Multicentre Clinical Trial to explore Safety and Efficacy of Hyperbaric Oxygen for preventing ICU admission, Morbidity and Mortality in Adult Patients With COVID-19                                                                                                                                                                                                                                                                                                                                                                                                                                                |
| Study code:                         | COVID-19-HBO                                                                                                                                                                                                                                                                                                                                                                                                                                                                                                                                                                                                                                              |
| ClinicalTrials.gov identifier:      | NCT04327505                                                                                                                                                                                                                                                                                                                                                                                                                                                                                                                                                                                                                                               |
| Short background/<br>Rationale/Aim: | <p><b>COVID-19</b> may cause <b>severe pneumonitis</b> that requires ventilatory support in some patients where the <b>ICU mortality</b> is as high as 62%. Hospitals do <b>not</b> have <b>enough ICU beds</b> to handle the demand and to date there is <b>no effective cure</b>.</p> <p>We explore a treatment administered in a randomized clinical trial that could <b>prevent ICU admission</b> and <b>reduce mortality</b>.</p> <p>The overall hypothesis to be evaluated is that HBO reduces mortality, increases hypoxia tolerance and prevents organ failure in patients with COVID19 pneumonitis by attenuating the inflammatory response.</p> |
| Study objectives:                   | <p><b>Primary objective:</b><br/>To evaluate if HBO reduces the number of ICU admissions compared to best practice for COVID-19</p> <p><b>Main secondary objectives:</b><br/>To evaluate if HBO reduces the load on ICU resources, morbidity and mortality in severe cases of COVID-19<br/>To evaluate if HBO mitigates the inflammatory reaction in COVID-19</p> <p><b>Other secondary objectives (in selection):</b><br/>To evaluate if HBO is safe for SARS-CoV-2 positive patients and staff</p>                                                                                                                                                      |
| Study design:                       | Randomized, controlled, phase II, open label, multicentre                                                                                                                                                                                                                                                                                                                                                                                                                                                                                                                                                                                                 |
| Study population:                   | Adult patients with SARS-CoV-2 infection, with at least two risk factor for increased mortality, likely to develop ARDS criteria and need intubation within 7 days of admission to hospital.                                                                                                                                                                                                                                                                                                                                                                                                                                                              |
| Number of subjects:                 | 200 (20+180)                                                                                                                                                                                                                                                                                                                                                                                                                                                                                                                                                                                                                                              |
| Inclusion criteria:                 | <ol style="list-style-type: none"> <li>1) Aged 18-90 years</li> <li>2) PaO<sub>2</sub>/FiO<sub>2</sub> (PFI) below 200 mmHg (26.7 kPa) (based on ABG measurement)</li> <li>3) Suspected or verified SARS-CoV-2 infection</li> <li>4) At least two risk factors for increased morbidity/mortality           <ul style="list-style-type: none"> <li>• Age above 50 years</li> <li>• Hypertension</li> </ul> </li> </ol>                                                                                                                                                                                                                                     |

Study Code: COVID-19-HBO  
 Version No: v.4  
 Date: 2021-02-27  
 EudraCT No: 2020-001349-37

|                                                     |                                                                                                                                                                                                                                                                                                                                                                                                                                                                                                                                                                                                                                                                                                                                                                                                                                                                                                                                                                                                                                          |
|-----------------------------------------------------|------------------------------------------------------------------------------------------------------------------------------------------------------------------------------------------------------------------------------------------------------------------------------------------------------------------------------------------------------------------------------------------------------------------------------------------------------------------------------------------------------------------------------------------------------------------------------------------------------------------------------------------------------------------------------------------------------------------------------------------------------------------------------------------------------------------------------------------------------------------------------------------------------------------------------------------------------------------------------------------------------------------------------------------|
|                                                     | <ul style="list-style-type: none"> <li>• Cardiovascular disease</li> <li>• Diabetes or pre-diabetes</li> <li>• Active or cured cancer</li> <li>• Asthma/COPD</li> <li>• Smoking</li> <li>• D-Dimer &gt; 1.0</li> <li>• Auto-immune disease</li> </ul> <p>5) Documented informed consent according to ICH-GCP and national regulations</p>                                                                                                                                                                                                                                                                                                                                                                                                                                                                                                                                                                                                                                                                                                |
| Exclusion criteria:                                 | <ol style="list-style-type: none"> <li>1) ARDS/pneumonia caused by other viral infections (positive for other virus)</li> <li>2) ARDS/pneumonia caused by other non-viral infections or trauma</li> <li>3) Known pregnancy or positive pregnancy test in women of childbearing age</li> <li>4) Patients with previous lung fibrosis more than 10% (verified by CT)</li> <li>5) CT- or spirometry-verified severe COPD with emphysema</li> <li>6) Contraindication for HBO according to local guidelines</li> <li>7) Not likely to need ICU admission within 7 days of screening (Subjective criteria that may exclude any patients that fulfill the other inclusion criteria but where the treating physician suspect a spontaneous recovery)</li> <li>8) Mental inability, reluctance or language difficulties that result in difficulty understanding the meaning of study participation</li> <li>9) Prisoner (Exclusion criteria according to IRB at UCSD)</li> <li>10) Unable/risky to move patient to Hyperbaric chamber</li> </ol> |
| Investigational product(s), dosage, administration: | <p>Hyperbaric oxygen (HBO) compared with best practice treatment</p> <p>HBO: HBO 1.6-2.4 ATA for 30-60 min, maximum 5 treatments first 7 days</p> <p>Control: Best practice treatment for COVID-19</p>                                                                                                                                                                                                                                                                                                                                                                                                                                                                                                                                                                                                                                                                                                                                                                                                                                   |
| Study endpoints:                                    | <p><b>Primary endpoint:</b></p> <p>The proportion of subjects admitted to ICU from day 1 to day 30, based on at least one of the following criteria:</p> <ol style="list-style-type: none"> <li>i) Rapid progression over hours</li> <li>ii) Lack of improvement on high flow oxygen &gt;40L/min or non invasive ventilation with fraction of inspired oxygen (FiO<sub>2</sub>) &gt; 0.6</li> <li>iii) Evolving Hypercapnia or increased work of breathing not responding to increased oxygen despite maximum standard of care available outside ICU</li> <li>iv) Hemodynamic instability or multi organ failure with maximum standard of care available outside ICU</li> </ol> <p><b>Secondary endpoints:</b></p>                                                                                                                                                                                                                                                                                                                       |

Study Code: COVID-19-HBO  
 Version No: v.4  
 Date: 2021-02-27  
 EudraCT No: 2020-001349-37

### Main Secondary Efficacy Endpoints

- I. Proportion of subjects with 30-day mortality, all-cause mortality, from day 1 to day 30.
- II. Time-to-Intubation, i.e. cumulative days free of invasive mechanical ventilation, from day 1 to day 30
- III. Time-to-ICU, i.e. cumulative ICU-free days, derived as the number of days from day 1 to ICU, where all ICU-free subjects are censored at day 30.
- IV. Mean change in inflammatory response from day 1 to day 30.
  - a. White cell count + differentiation
  - b. Procalcitonin
  - c. C-Reactive protein
  - d. Cytokines (IL-6) (if available at local laboratory)
  - e. Ferritin
  - f. D-Dimer
  - g. LDH
- V. Overall Survival

### Safety Endpoints

- I. The number of subjects, proportion of subjects and number of events of AE.
- II. The number of subjects, proportion of subjects and number of events of SAE
- III. The number of subjects, proportion of subjects and number of events of SADR.
- IV. Mean change in  $\text{PaO}_2/\text{FiO}_2$  before and after HBO compared to mean variance in  $\text{PaO}_2/\text{FiO}_2$  in control group during day 1 to day 7.
- V. Mean change in NEWS before and after HBO compared to mean change in daily NEWS in control group during day 1-day 7.
- VI. Number of negative events in staff associated with treatment of subject, (e.g. contact with aerosol from subject), number of events from day 1 to day 30 or last day in hospital if subject is discharged earlier, or at withdrawal.

Study period: Q2 2020 – Q4 2021

Statistical analyses Primary and secondary endpoints will be evaluated using the ITT population (i.e. all randomized subjects) and the primary endpoint also using the PP population (i.e. all randomized subjects with no major protocol violations). All randomized subjects will be included in the safety population. The primary analysis of the primary endpoint will be performed using the Cochran Mantel Haenszel test adjusting for randomisation strata site and gender.

1 Study Code: COVID-19-HBO  
2 Version No: v.4  
3 Date: 2021-02-27  
4 EudraCT No: 2020-001349-37  
5  
6

## 7 2. Background and Rationale 8 9

### 10 2.1 Clinical manifestations and challenges with COVID-19 11

12 SARS-CoV-2 was first identified in China in December 2019 and is now identified as the third  
13 Corona virus outbreak in 20 years after SARS-CoV in 2003 and MERS in 2012(Yang et al.,  
14 2020b). The clinical infectious disease COVID-19 was declared a pandemic by WHO on March  
15 11, 2020, and more than 400 articles have been published and no specific treatment has been  
16 successful despite more than 160 clinical trials being registered in March 2020(Arabi et al.,  
17 2020). A synchronized immune response is vital in the control and resolution of viral infections.  
18 COVID-19 enters human cells through Angiotensin Converting Enzyme 2 (ACE2), abundant  
19 in lungs, arteries, heart, kidney and intestines, causing a downstream activation of an  
20 inflammatory cascade that activates the innate immune system. In some patients, this  
21 activation and resolution is dysregulated, causing a disproportionate reaction, popularly known  
22 as cytokine storm(Guo et al., 2020). Antiviral drugs Lopinavir-Ritonavir did not show any  
23 significant benefit compared to standard care in a randomized controlled study of 199 patients  
24 (Cao et al., 2020).  
25  
26  
27  
28  
29

30 Clinical experience from China and Italy is already published and even though the overall  
31 mortality is low (3.4%) the numbers from critical care are fearsome(Chen et al., 2020, Yang et  
32 al., 2020a, Arabi et al., 2020, Grasselli et al., 2020). Mortality rates have been reported as  
33 high as 90% in patients developing ARDS in early reports from Wuhan province and more  
34 recent reports have reported overall 28-d mortality rates of 61,5% in ICU patients with acute  
35 respiratory illness (Yang et al., 2020a) In a recent retrospective cohort study from Wuhan 19%  
36 of patients needed mechanical ventilation or ECMO of whom 97% died, SIC! 26% was  
37 admitted to the ICU and hospital mortality rate was 28% (Zhou et al., 2020). Mortality rates in  
38 ARDS in general are until now decreasing but still very high. A recent systemic overview  
39 reported mortality rates since 2010: Overall rates of in-hospital- 45%, ICU- 38% and 28/30-d-  
40 30% (Maca et al., 2017).  
41  
42  
43  
44  
45

46 ALI associated with COVID-19 differs from other described ARDS with rapidly progressing  
47 respiratory failure and fibrosis; post mortem biopsy of pulmonary tissue from a 72 yo man that  
48 died three weeks after the onset of symptoms was described as “diffuse alveolar damage, with  
49 reactive type II pneumocyte hyperplasia, intra-alveolar fibrinous exudates were present and  
50 loose interstitial fibrosis and chronic inflammatory infiltrates” (Zhang et al., 2020). Even  
51 patients with mild symptoms who recover from COVID-19 may have significant changes on  
52 pulmonary CT-scan, with diffuse ground glass opacities, crazy-paving pattern and  
53 consolidation suggesting severe inflammatory involvement (Pan et al., 2020).  
54  
55  
56  
57  
58  
59  
60

1 Study Code: COVID-19-HBO  
2 Version No: v.4  
3 Date: 2021-02-27  
4 EudraCT No: 2020-001349-37  
5  
6

## 7 2.2 Rationale for the study and explanation of the hypothesis 8

9 Macrophages, part of the innate immune system, have become major therapeutic targets in  
10 ALI/ARDS. Macrophage activation is involved in the early phase of ARDS (Sulkowski et al.,  
11 1997). Alveolar macrophages (AM) are the gate keepers of the innate immune system in the  
12 lungs. Upon activation, they secrete several inflammatory cytokines and chemokines including  
13 IL-1 $\beta$ , IL-6 and TNF- $\alpha$ , to attract Th1/Th17-cells, new macrophages and neutrophils. AM are  
14 also responsible for clearing apoptotic neutrophils when the infection resolves. Proteomics  
15 involved in the switch from inflammatory macrophage (M1) to resolving or anti-inflammatory  
16 macrophage sub type (M2) was recently described in a human study of ALI/ARDS (Dong et  
17 al., 2013). Hypoxia Inducible factors (HIF-1 and HIF-2) and inflammatory factors such as  
18 STAT3 and NF $\kappa$ B are important transcription factors involved in macrophage polarization. How  
19 and if we can intervene with this intricate network of redox signalling is not clear (Brune et al.,  
20 2013).  
21  
22  
23

24  
25  
26 Hyperbaric oxygen (HBO) has been used for almost a century, initially for decompression  
27 sickness (DCS) but it was soon noted that it had several anti-inflammatory effects (Gill and  
28 Bell, 2004, Thom, 2011). Recent evidence from animal studies suggests that HBO ameliorates  
29 inflammation in DCS-induced ALI through polarization of macrophages from M1 to M2 (Han  
30 et al., 2017, Geng et al., 2015). Hyperbaric oxygen has been shown to polarize macrophages  
31 from M1 to M2 associated with IL-10 and thereby reducing inflammation (Buras et al., 2006,  
32 Oyaizu et al., 2018) and 30-min HBO ex vivo inhibits monocyte IL-1 $\beta$  and TNF- $\alpha$  (Benson et  
33 al., 2003).  
34  
35

36  
37  
38 Patients presenting to the hospital with COVID-19 normally have almost a week of mild or  
39 moderate flu-like symptoms but on admission often have an isolated hypoxic respiratory  
40 failure. Many patients, despite severe hypoxemia do not have dyspnoea or carbon dioxide  
41 retention suggesting a diffuse but moderate alveolar edema and a hypoxic adaptation.  
42 Hypoxia is relative to the upregulation of adaptive mechanisms. When medical oxygen is  
43 administered for a prolonged period, the adaptive mechanisms are put out of play and might  
44 aggravate oxidative stress. Hyperbaric oxygen will give patients a short burst of oxidative  
45 stress and re-activate adaptive responses. In a study with healthy volunteers, we have seen  
46 that 28-min of HBO changes microRNA-210 (miR-210) and micro-RNA 34a (miR-34a) in  
47 peripheral blood mononuclear cells (PBMC) (own unpublished preliminary data). MiR-210 and  
48 miR-34a have been shown to micromanage HIF-1 in the regulation macrophage polarization  
49 (Weng et al., 2019, Karshovska et al., 2020). Our hypothesis was recently published in a peer-  
50 reviewed journal (Kjellberg et al., 2020) and a mini-review article supporting our hypothesis  
51 has also been published (Paganini et al., 2020).  
52  
53  
54

55  
56  
57 Published and unpublished case reports from China and USA indicate that HBO in these  
58 patients may be safe and beneficial (Zhong, 2020, Chen, 2020, Thibodeaux et al., 2020). HBO  
59 has the potential to reduce inflammation, restore normal defence mechanisms and thereby  
60

1 Study Code: COVID-19-HBO  
2 Version No: v.4  
3 Date: 2021-02-27  
4 EudraCT No: 2020-001349-37  
5

6 reduce morbidity and mortality in COVID-19 pneumonitis. A recent prospective cohort trial  
7 showed 50% lower mortality and 65% lower need of mechanical ventilation in the HBO-treated  
8 group compared to propensity matched controls(Gorenstein et al., 2020).  
9

## 10 11 12 3. Benefit-risk evaluation 13

### 14 15 3.1 The risk group 16

17 There is currently no effective treatment available for COVID-19 and the mortality is high in  
18 risk groups. The availability of ICU beds with ventilators and other means of supportive care  
19 are prognosticated to be exhausted in most countries including Sweden. A recently published  
20 case series of five patients “with impending intubation” supports a previously submitted  
21 manuscript and our hypothesis of beneficial effect of HBO for COVID-19. In this case series,  
22 all patients recovered with 1-6 treatments, without the need of intubation.  
23  
24

25  
26  
27 Five trials apart from ours are registered on clinicaltrials.gov. We have communicated with all  
28 the principal investigators of the registered trials and several peers that have treated COVID-  
29 19 patients with “compassionate use” of HBO. So far more than 20 patients have been treated  
30 with HBO within registered clinical trials and more than 200 patients have been treated on  
31 “compassionate grounds” outside clinical trials. Only two incidents of adverse events have  
32 been reported, both being desaturation after treatment; one patient required transient non-  
33 invasive ventilation and the other one required intubation and mechanical ventilation shortly  
34 after HBO. From the “expert opinion” and clinical experience, there are no signals that HBO is  
35 overtly dangerous for patients with COVID-19. The only way to scientifically evaluate the  
36 safety and efficacy of HBO for COVID-19 is through a well-designed and sufficiently powered  
37 clinical trial like ours.  
38  
39  
40  
41

42 HBO has the potential to prevent COVID-19 infection from developing into ARDS and multiple  
43 organ failure which would then relieve ICU resources and potentially save lives. The nature of  
44 the disease with high mortality and no effective cure makes the risk group a “vulnerable group”  
45 and it is important to make sure that the subjects are not unduly influenced by the expectation  
46 or benefits associated with participation. Therefore, we will conduct a clinical trial in  
47 compliance with GCP, the Declaration of Helsinki and national regulatory requirements. The  
48 written information has a neutral language explaining both risks and potential benefits and  
49 investigators are instructed to keep a neutral tone in the oral information.  
50  
51  
52  
53

54 The cause of the rapid ARDS progression in COVID-19 is still an enigma and the mechanisms  
55 of ARDS in general are not fully understood. We present a plausible hypothesis of the  
56 mechanism and a possible cure. Since we do not have any better options than to “wait and  
57 see”, the potential benefits for the subject outweigh the risk.  
58  
59  
60

1 Study Code: COVID-19-HBO  
2 Version No: v.4  
3 Date: 2021-02-27  
4 EudraCT No: 2020-001349-37  
5  
6

## 7 3.2 General risks with HBO and oxygen toxicity

9 There is always a risk of deterioration associated with HBO in these fragile subjects due to the  
10 nature of their illness. Hyperbaric oxygen is a well-established method used for almost a  
11 century for several different indications. The mechanisms of HBO are not fully understood but  
12 it is generally regarded as safe with few adverse events and extremely rare serious adverse  
13 events. Undersea and hyperbaric Medical Society (UHMS) has reported a total of 40  
14 complications per 10,000 treatments during 463,293 treatments over the past two years  
15 (Moon, 2019). Following are the adverse events per 10,000 treatments: ear pain 20,  
16 confinement anxiety 8, hypoglycaemic event 5, shortness of breath 2, seizure 2, sinus pain,  
17 1, chest pain. The rationale for a short treatment in this trial is that there is evidence for effect  
18 in 30 minutes and a longer treatment may add to oxygen toxicity. One can argue that the area  
19 under the curve is important for effect and hence local variances in dose would result in similar  
20 oxygen toxicity, e.g. 1.6-2.0 ATA for 90 minutes would give 144-180 UPTD and 2.4 ATA for  
21 30-60 minutes would give 72-144 UPTD. This needs to be put in relation to the daily dose that  
22 these patients receive in normobaric oxygen 40-100%, which is equivalent of 576-1440 CPTU/  
23 24 hours.  
24  
25  
26  
27

## 28 3.3 Blood sampling

29 Blood sampling may have negative impact on the subject. The subjects are critically ill and  
30 would have a large amount of blood sampling daily. Many of the blood sample required for the  
31 study are included in the clinical practice, so the actual extra blood taken will in many cases  
32 only be half of the volume presented in the procedures. The blood sampling serves three  
33 purposes:  
34  
35

- 36 1. Safety, which is of benefit for the subject.
- 37 2. Efficacy, which at least in part is beneficial for the subject since the exact dose will likely be  
38 individual and need to be titrated to effect. It will also serve as a quality control measure to  
39 ensure the validity of the data upon presentation of results.
- 40 3. Explanatory, which will not benefit the subjects in the present illness but since it is essential  
41 to learn more about the COVID-19 disease and HBO, this will potentially benefit the subjects  
42 the next time they catch a similar infection. Explanatory objectives are important for public  
43 health.  
44  
45  
46  
47  
48

## 49 3.4 Handling of sensitive personal data

50 We will handle personal data including gene expression analyses on the subjects creating a  
51 risk of personal integrity violation. The trial is performed according to ICH-GCP, all sites will  
52 be informed and educated about the protocol and data will be entered into an eCRF. The data  
53 will not identify any person taking part in the study, in accordance with the EU Data Protection  
54 Directive (95/46/EU). We have an external monitor that will help us assess the risks by  
55 assessing quality of trial design, data collection and informed consent.  
56  
57  
58  
59  
60

1 Study Code: COVID-19-HBO  
2 Version No: v.4  
3 Date: 2021-02-27  
4 EudraCT No: 2020-001349-37  
5  
6

### 7 3.5 Safety and logistics

8 There are several safety and logistic issues involved with HBO treatment of subjects with  
9 COVID-19 pneumonitis with or without ARDS. Most of the issues are the same as any other  
10 patient group, that staff working with HBO is aware of. Subjects will be transported from the  
11 ward to the multiplace or monoplace chamber depending on severity on inclusion (according  
12 to local guidelines). There are few specific risks with SARS-CoV-2 positive patients that need  
13 to be addressed.  
14  
15

- 16 1. The risk of viral spread and contamination:
    - 17 a. during transport must be addressed according to local guidelines to minimize
    - 18 contact with personell and other patients.
    - 19 b. inside the chamber is not increased if “on demand, built-in-breathing oxygen
    - 20 masks” (BIBS) are used with virus filters on the exhalation hose. If “hoods” or “high
    - 21 flow- masks” are used there is a significantly higher risk for viral contamination if it
    - 22 leaks or is accidentally removed.
    - 23 c. should be known by attending staff that need to wear protective gear according to
    - 24 local guidelines.
  - 25 2. The risk of deterioration in gas exchange:
    - 26 a. During HBO the alveolar partial pressure of oxygen (PAO<sub>2</sub>) is = 228.4 kPa
    - 27 (PAO<sub>2</sub>:240 - PAH<sub>2</sub>O:6.3 - PACO<sub>2</sub>:5.3). The risk of deterioration in oxygenation
    - 28 during HBO is negligible, but a transient decline in arterial oxygenation (PaO<sub>2</sub>) has
    - 29 been seen in intubated patients the first few hours after HBO. Safety checks of
    - 30 SpO<sub>2</sub> (and PO<sub>2</sub>/PCO<sub>2</sub> if warranted) 1h and 6h post HBO is part of the protocol.
    - 31 b. There is a risk is carbon dioxide (CO<sub>2</sub>) retention due to increased work of
    - 32 breathing. Therefore, a clinical assessment of work of breathing, including arterial
    - 33 SpO<sub>2</sub>, PO<sub>2</sub> and PCO<sub>2</sub>, if warranted, is part of the protocol at -1h before HBO.
  - 34 3. The risk of SAE during and immediately after treatment:
    - 35 a. Staff attending the patients should be trained to manage situations such as need
    - 36 for intubation, circulatory chock, cardiac arrest and pneumothorax (according to
    - 37 local guidelines).
- 38  
39  
40  
41  
42  
43

44 Monitoring will be conducted at each trial site before, during and after the trial according to  
45 the monitoring plan. Interim analysis for safety and efficacy will be conducted after 20, and  
46 70 subjects.  
47

48 In summary, we believe the benefits for subjects, the risk-group and public health well  
49 outweigh the risks.  
50

### 51 4. Study objectives

52 The overall hypothesis to be evaluated is that HBO reduces mortality, increases hypoxia  
53 tolerance and prevents organ failure in patients with COVID19 pneumonitis by attenuating the  
54 inflammatory response.  
55  
56  
57  
58  
59  
60



1 Study Code: COVID-19-HBO  
2 Version No: v.4  
3 Date: 2021-02-27  
4 EudraCT No: 2020-001349-37  
5  
6

## 7 4.1 Primary objective

8 To evaluate if HBO reduces the number of ICU admissions compared to Best practice for  
9 COVID-19.  
10  
11

## 12 4.2 Secondary objective(s)

### 13 4.2.1 Main secondary objective

14 To evaluate if HBO:

- 15 • reduces mortality in severe cases of COVID-19.
- 16 • reduces morbidity associated with COVID-19.
- 17 • reduces the load on ICU resources in COVID-19.
- 18 • mitigates the inflammatory reaction in COVID-19.

### 19 4.2.2 Other secondary objectives

- 20 • Investigate how CPTU correlates with outcome in COVID-19.
- 21 • Investigate how changes in inflammatory profile in blood correlate with disease severity and outcome.
- 22 • Investigate how changes in vital parameters and PFI correlate with outcome
- 23 • Investigate if HBO reduces pulmonary edema, and Inflammatory Macrophage activity in SARS-CoV-2 positive patients.
- 24 • Explore HBO mechanisms including several inflammatory pathways that can be monitored in blood and plasma.
- 25 • Explore how changes in expression of HIF 1-3 regulated genes in PBMC correlate with disease severity and outcome (cohort of 20 subjects).
- 26 • Explore how changes in Plasma MicroRNA interacting with HIF 1-3 regulated genes correlate with disease severity and outcome (cohort of 20 subjects).
- 27 • Evaluate microRNA as potential biomarkers for outcome.
- 28 • Evaluate if HBO is safe for SARS-CoV-2 positive patients and staff.

## 29 4.3 Primary endpoint:

30 The proportion of subjects admitted to or selected for ICU (including ECMO) from day 1 to day  
31 30, based on at least one of the following criteria at the discretion of the investigator:  
32

- 33 i) Rapid progression over hours.
- 34 ii) Lack of improvement on high flow oxygen >40L/min or non-invasive ventilation with  
35 fraction of inspired oxygen (FiO<sub>2</sub>) > 0.6.
- 36 iii) Evolving Hypercapnia or increased work of breathing not responding to increased  
37 oxygen despite maximum standard of care available outside ICU.  
38  
39  
40  
41  
42  
43  
44  
45  
46  
47  
48  
49  
50  
51  
52  
53  
54  
55  
56  
57  
58  
59  
60

1 Study Code: COVID-19-HBO  
2 Version No: v.4  
3 Date: 2021-02-27  
4 EudraCT No: 2020-001349-37  
5  
6

- 7 iv) Hemodynamic instability or multi organ failure with maximum standard of care available  
8 outside ICU.  
9

## 10 4.4 Secondary endpoints:

### 11 4.4.1 Secondary Efficacy Endpoints

#### 12 4.4.1.1 Main Secondary Efficacy Endpoints

- 13  
14  
15  
16  
17 I. Proportion of subjects with 30-day mortality, all-cause mortality, from day 1 to day  
18 30.  
19  
20 II. Time-to-Intubation, i.e. cumulative days free of invasive mechanical ventilation, from  
21 day 1 to day 30.  
22  
23 III. Time-to-ICU, i.e. cumulative ICU free days, derived as the number of days from day  
24 1 to ICU, where all ICU free subjects are censored at day 30.  
25  
26 IV. Mean change in inflammatory response from day 1 to day 30.  
27 a. White cell count + differentiation  
28 b. Procalcitonin  
29 c. C-Reactive protein  
30 d. Cytokines (IL-6) (if available at local laboratory)  
31 e. Ferritin  
32 f. D-Dimer  
33 g. LDH  
34  
35 VI. Overall Survival.  
36

#### 37 4.4.1.2 Other Efficacy Endpoints

- 38  
39 I. Hospital mortality of any cause, proportion of subjects, from day 1 to day 30.  
40  
41 II. ICU mortality, mortality of any cause in ICU, proportion of subjects, from day 1 to  
42 day 30.  
43  
44 III. Time-to-stop of intubation/invasive mechanical ventilation, from ICU admission to  
45 day 30.  
46  
47 IV. Mean daily NEWS from day 1 to day 30.  
48  
49 V. Mean change in PaO<sub>2</sub>/FiO<sub>2</sub> (PFI), from day 1 to day 2, ... to day 30.  
50  
51 VI. HBO Compliance.  
52 a. Proportion of HBO treatments given vs planned.  
53 b. Proportion of subjects with HBO treatment administered within 24h after  
54 enrolment.  
55  
56 VII. Time-to-discharge from hospital.

### 57 4.4.2 Exploratory/Descriptive Endpoints

- 58 I. Mean oxygen dose per day including HBO and cumulative pulmonary oxygen  
59 toxicity expressed as Units of oxygen pulmonary toxicity dose (UPTD) and  
60 Cumulative pulmonary toxicity dose (CPTD) from day 1 to day 30.  
II. Median number of HBO treatments and dose of HBO given, from day 1 to day 7.

Study Code: COVID-19-HBO  
 Version No: v.4  
 Date: 2021-02-27  
 EudraCT No: 2020-001349-37

- III. Change in expression of Micro RNA in plasma from day 1 to day 30.
- IV. Change in gene expression and Micro RNA interactions in Peripheral Blood Mononuclear Cells (PBMC) from day 1 to day 30.
- V. Immunological response (20 subjects) from day 1 to day 30 in the following.
  - a. Cytokines extended including (IL-1 $\beta$ , IL-2, IL-6, IL33 and TNF $\alpha$ )
  - b. Lymphocyte profile
  - c. Flowcytometry with identification of monocyte/lymphocyte subsets including but not limited to CD3+/CD4+/CD8+ and CD4+/CD8+ ratio
  - d. FITMaN panel/Flow cytometry, Interleukins (IL-1 $\beta$ , IL-2, IL-6, IL33 and TNF $\alpha$ ),
  - e. T-reg cells (CD3+/CD4+/CD25+/CD127+)
  - f. Monocyte proliferation markers, Ex vivo monocyte function
- VI. Mean change in routine biomarkers for organ dysfunction, from day 1 to day 30.
- VII. Viral load, from day 1 to day 30.
- VIII. Number of secondary infections, number of events and patients from day 1 to day 30.
- IX. Diagnosed PE needing treatment, number of events and patients from day 30.
- X. Changes on Pulmonary CT from day 1 to day 30.
- XI. Changes on Chest X-ray, from day 1 to day 30.
- XII. Changes in Lung ultrasound, from day 1 to day 30.

#### 4.4.3 Safety Endpoints

- I. Number of subjects, proportion of subjects and number of events of AE.
- II. Number of subjects, proportion of subjects and number of events of SAE.
- III. Number of subjects, proportion of subjects and number of events of SADR.
- IV. Mean change in PaO<sub>2</sub>/FiO<sub>2</sub> before and after HBO compared to mean variance in PaO<sub>2</sub>/FiO<sub>2</sub> in control group during day 1 to day 7.
- V. Mean change in NEWS before and after HBO compared to mean change in daily NEWS in control group during day 1-day 7.
- VI. Number of negative events in staff associated with treatment of subject, (e.g. contact with aerosol from subject), number of events from day 1 to day 30 or last day in hospital if subject is discharged earlier, or at withdrawal.

## 5. Study design and procedures

### 5.1 Overall Study design

#### Phase II Clinical Trial

Prospective randomized, open label, multi-centre trial with an estimated enrolment of 200 subjects (20+180). The randomization procedure is described in section 7.5.

#### Parallel group

Intervention: Hyperbaric oxygen (HBO) in addition to best practice compared with best practice

Study Code: COVID-19-HBO  
 Version No: v.4  
 Date: 2021-02-27  
 EudraCT No: 2020-001349-37

HBO: HBO 1.6-2.4 ATA for 30-60 min, maximum five treatments within seven days from inclusion.

Control: Best practice for COVID-19 pneumonitis.

The first HBO treatment will be given within 24 hours after inclusion. Patients with respiratory symptoms admitted to the hospital will be informed and asked to participate. The patients will be included once they fulfil the inclusion criteria and none of the exclusion criteria, but the timing of the HBO treatment will depend on available resources.

Due to the nature of the epidemic, the available resources and the risk of transport and contamination, it would be unethical and possibly unsafe to conduct a placebo-controlled trial. In the evaluation of safety and efficacy this will be considered.

Clinical equipoise: The rationale for 1:1 randomization is that COVID-19 infection is a new disease and we will use a slightly lower dose of HBO than often used in more stable patients without acute lung injury. Furthermore, 1:1 allocation will maximise the statistical power. If the interim analysis can show supportive evidence for efficacy the trial committee/safety and data monitoring board may choose to change the randomization to 2:1.

In 20 subjects at Karolinska University hospital, extended explanatory immunology/genomic data will be collected. These subjects will be recruited from one specific site that has the ability to perform the analyses.

The trial continues for 30 days after inclusion or until withdrawal.

## 5.2 Procedures and flow chart

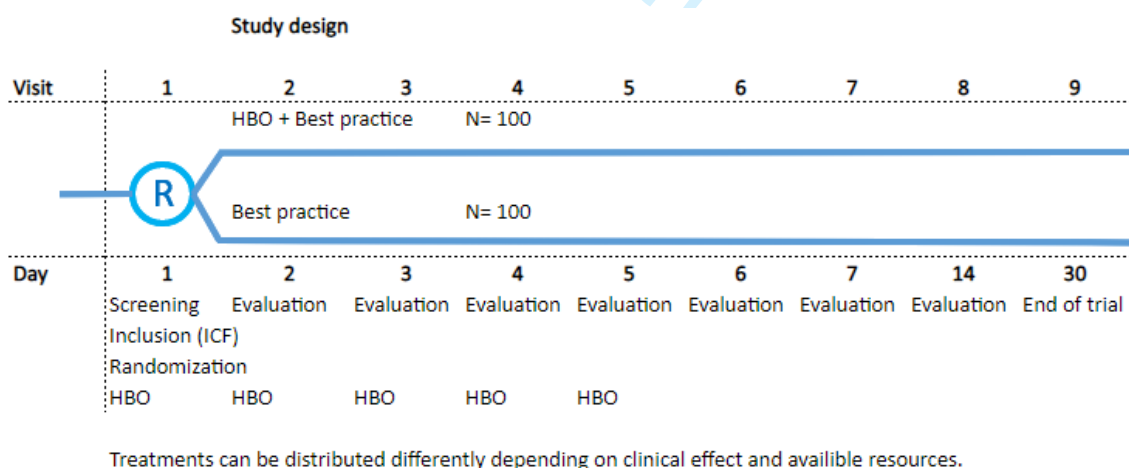

### 5.2.1 Study schedule

Each visit consists of 3 parts:

- Review of medical records since last visit and documentation in the eCRF.
- Measurements and actions to correct any deviations.
- HBO Treatment (Visit 1-7 only).

1 Study Code: COVID-19-HBO  
2 Version No: v.4  
3 Date: 2021-02-27  
4 EudraCT No: 2020-001349-37  
5  
6

### 7 **Visit 1: (Day 1)**

8 a) After the patient has been informed about the study and agreed to participate, an **informed**  
9 **consent** form (ICF) will be **signed** before any study specific procedures occur. During the  
10 **Screening**, procedures to assure the patient's eligibility for the study participation will be  
11 performed such as a baseline ABG sample (if not available for the same day, after 8am, from  
12 the patient's medical records) and serum pregnancy test in female subjects of childbearing  
13 potential.; **Demographics, medical history** including COVID-19 specific history, routine  
14 blood tests, secondary infections, viral load and radiology will be reviewed. Concomitant  
15 **medications** including oxygen dose (CPTD) since admission, before inclusion will be  
16 recorded. **Mean NEWS for the past 24 hours (3 measurements 08, 14, 22 +/-3h)** will be  
17 recorded if available (mean is calculated after data is exported from eCRF at the end of Study).  
18 Baseline NEWS at inclusion will also be recorded unless it coincides with any of the three  
19 timepoints scheduled for NEWS described in section b below. A **physical examination** will  
20 be performed and a **HBO specific** questionnaire as per local routine will be obtained. Subject  
21 will then be **randomized** to either HBO (in addition to best practice) or best practice.  
22

23 b) Non-fasting **blood samples** will be collected, **routine chemistry** will be checked, recorded  
24 and if necessary supplemented. **Study specific blood** tests and blood/plasma for future  
25 biomedical research will be collected and time shall be recorded. NEWS will be collected three  
26 times during 24h, **8am (08:00), 2pm (14:00), 10pm (22:00) (+/-3h)**. PFI (collected from  
27 ABG/CBG) will be confirmed at least once after inclusion, additional if warranted. The number  
28 of **NEWS** depends on when, during the day, the subject is included in the study.  
29

30 If the subject is randomized to **HBO additional NEWS** should be recorded **-1hour (+/- 45**  
31 **min)** prior to HBO treatment, **+1hour (+/- 45 min)** after HBO treatment and **6h (+/- 2 hours)**  
32 after HBO treatment (marked as † and ‡ in the list of procedures) unless it coincides with  
33 routine NEWS. **NEWS (and ABG/CBG, if warranted)**, shall be checked by an investigator and  
34 if **any deviation, action** shall be taken and/or **reported** to the ward physician for **both groups**.  
35

36 c) Subject will be **transported to the hyperbaric chamber** and given **HBO within 24 hours**  
37 **from randomization**, time and date are recorded. If planned but not given, this should be  
38 recorded, including the reason for not giving the treatment.  
39

### 40 **Visit 2-7: (Day 2-7)**

41 a) **Review of medical records** for changes in concomitant medication, DNR status, routine  
42 blood tests, AE, secondary infections, viral load, radiology and review of data on Staff Safety.  
43 Documentation of Cumulative Oxygen dose (**UPTD**) previous 24 hours. **NEWS** previous 24  
44 hours (**3 measurements 08, 14, 22 +/- 3h**) (Mean is calculated after data is exported from  
45 eCRF at the end of study).  
46

47 b) **Routine and study specific blood** tests including CBG/ABG at **8 am (+/- 3 h)**.  
48 **If the subject is considered unstable in SpO<sub>2</sub> or has increased work of breathing,**  
49 **CBG/ABG** will be collected and **NEWS** are performed and documented at the same time.  
50 In subjects randomized to **HBO, NEWS** will be taken and recorded **-1hour (+/- 45 min)** prior  
51 to HBO treatment, **+1hour (+/- 45 min)** after HBO treatment and **6h (+/- 2hours)** after HBO  
52 treatment.  
53

54  
55  
56  
57  
58  
59  
60  
23 (50)

1 Study Code: COVID-19-HBO  
2 Version No: v.4  
3 Date: 2021-02-27  
4 EudraCT No: 2020-001349-37  
5

6 treatment (marked as † and ‡ in the list of procedures) until the subject is considered to be “in  
7 stable condition” by the ward physician. CBG/ABG shall be collected and analyzed upon  
8 clinical deterioration, suspicion of CO<sub>2</sub>-retention or increase in NEWS. NEWS and CBG/ABGs  
9 shall be checked by an investigator and if **any deviation, action** shall be taken and/or  
10 **reported** to the ward physician for **both groups**.  
11

12 c) Subject will be **transported to the hyperbaric chamber** and given **HBO (maximum 5 of**  
13 **the first 7 visits)**, time and date are recorded. If planned but not given, this will be recorded  
14 including the reason for not giving the treatment.  
15

### 16 **Visit 8 and 9: (Day 14 and Day 30)**

17  
18 a) **Review of medical records** since previous visit 8:00 (8am) to 7:59 (7:59am) for changes  
19 in concomitant medication, DNR status, routine blood tests, AE (e.g. ICU admission,  
20 Intubation, secondary infections), viral load, radiology and review of data on Staff Safety. If  
21 subject is still admitted to hospital; Documentation of Cumulative Oxygen dose (**UPTD**)  
22 previous week for visit 8 and previous 2 weeks for visit 9. **NEWS** previous week (**maximum**  
23 **three measurements 08, 14, 22 +/-3h** (Mean is calculated after data is exported from eCRF  
24 at the end of study). At visit 9, medical records will be reviewed for changes in concomitant  
25 medication, DNR status, routine blood tests, AE (e.g. ICU admission, Intubation), secondary  
26 infections, viral load, radiology and review of data on Staff Safety, until end of visit 9 (i.e. end  
27 of study)  
28

29 b) **Routine and study specific blood tests at 8 am (+/- 3 h).**

30 If the subject is still in hospital and considered to be “in stable condition” by the ward  
31 physician, CBG/ABG will be taken on clinical deterioration, suspicion of CO<sub>2</sub> retention or  
32 increase in NEWS.  
33

34 **NEWS** are performed and documented minimum once, maximum three times during 24h,  
35 **8am (08:00), 2pm (14:00), 10pm (22:00) (+/-3h)** and **CBG/ABG** will be collected if clinically  
36 warranted at the same time points. Routine and study specific blood tests will be collected in  
37 hospitalized patients and 20 patients in the Karolinska subgroup regardless of hospital  
38 admission.  
39

### 40 **End of Study**

41 A final visit in the electronic case report form (eCRF) should be completed for every  
42 randomised patient whether the patient completed the study or not. The reason for any early  
43 discontinuation should be indicated on this form.  
44

## 45 **5.2.2 Assessments and procedures**

### 46 **Medical history**

47 Relevant medical history such as risk factors in this trial and any other disease affecting the  
48 immune system, respiratory or circulatory systems will be recorded at Visit 1. The medical  
49 history will include a review of past and current relevant diseases/diagnoses/symptoms.  
50 Diagnosis/symptoms/signs during and the start year (of diagnosis) will be collected. A specific  
51 evaluation/medical exam will be focusing on HBO specific relative contraindications according  
52

Study Code: COVID-19-HBO  
 Version No: v.4  
 Date: 2021-02-27  
 EudraCT No: 2020-001349-37

to local routines. Findings and/or abnormalities detected will be recorded in the eCRF. Other medical history, not relevant for the trial will be documented in medical records.

**Demography**

Demographic data such as gender, age, race, body weight, height, restrictions in escalation of care e.g. DNR and smoking habits will be collected at Visit 1. Records will be reviewed for update/change in DNR status at each visit.

**Concomitant medication**

Information regarding prior and concomitant medications will be collected at Visit 1. The Investigator or designee will assess changes in concomitant medications e. g. stop date or entry of a new treatment, throughout the study by reviewing the patient’s medical records. Any changes will be recorded in the electronic Case Report Form (eCRF).

**NEWS SOP**

NEWS chart will be assessed as mean NEWS during 24 hours, NEWS will be assessed at 8am (08:00), 2pm (14:00), 10pm (22:00) (+/-3h). Mean NEWS during 24 hours is calculated from exported eCRF data.

Resp Rate (RPM), SpO<sub>2</sub>, Supplemental oxygen Y/N, Temperature (deg C), Heart Rate (BPM), Systolic Blood Pressure, Consciousness (VPU). The number of NEWS assessments will depend on the subject’s condition and shall be recorded daily as long as the patient is admitted to hospital.

National Early Warning Score (NEWS)\*

| PHYSIOLOGICAL PARAMETERS | 3     | 2        | 1           | 0           | 1           | 2         | 3          |
|--------------------------|-------|----------|-------------|-------------|-------------|-----------|------------|
| Respiration Rate         | ≤8    |          | 9 - 11      | 12 - 20     |             | 21 - 24   | ≥25        |
| Oxygen Saturations       | ≤91   | 92 - 93  | 94 - 95     | ≥96         |             |           |            |
| Any Supplemental Oxygen  |       | Yes      |             | No          |             |           |            |
| Temperature              | ≤35.0 |          | 35.1 - 36.0 | 36.1 - 38.0 | 38.1 - 39.0 | ≥39.1     |            |
| Systolic BP              | ≤90   | 91 - 100 | 101 - 110   | 111 - 219   |             |           | ≥220       |
| Heart Rate               | ≤40   |          | 41 - 50     | 51 - 90     | 91 - 110    | 111 - 130 | ≥131       |
| Level of Consciousness   |       |          |             | A           |             |           | V, P, or U |

\*The NEWS initiative based from the Royal College of Physicians' NEWS Development and Implementation Group (NEWSDIG) report, and was jointly developed and funded in collaboration with the Royal College of Physicians, Royal College of Nursing, National Outreach Forum and NHS Training for Innovation.

Please see next page for explanatory text about this chart.

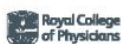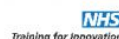

**Blood samples**

All details regarding the blood sampling for all laboratory analysis will be provided in the Laboratory Manual.

**HBO SOP and assessment**

Study Code: COVID-19-HBO  
 Version No: v.4  
 Date: 2021-02-27  
 EudraCT No: 2020-001349-37

Each site will have their own SOP according to their local guidelines but in general terms:

Patients will be transported from the ward to the multiplace or monoplace chamber depending on severity on inclusion (according to local guidelines). Patients will be treated with 30-60 min HBO (1.6-2.4 Bar with 5-15 min compression time and 5-15 minutes decompression time, according to local routines). The number of treatments and timing will depend on available resources and clinical efficacy at the discretion of the attending physician. If the patient does not respond in any way to 30 min the first day, the attending physician may choose to treat the patient for 60 minutes instead of 30min. HBO treatment will likely stop if the patient is intubated or admitted to the ICU. However if any site has the resources to continue HBO from the ICU, it may continue; if the subject is intubated, the ventilator should ideally not be changed and if necessary, the endotracheal tube should be clamped to maintain the positive end-expiratory pressure (PEEP) and prevent risk of viral spread.

Date and time for administered HBO treatment will be recorded. HBO treatment that was planned but could not be administered, including the reason, will be recorded.

### AE and ADR

Adverse events and collection of Adverse Events and Serious Adverse Events

Collection of AE will start directly after inclusion. Definitions, documentation and reporting of AEs are described in detail in AE section below.

### UPTD calculation (not mandatory)

For practical reasons the ambient air pressure one atmosphere will be estimated to 1 ATA. Review of records, the mean oxygen dose at 3 time timepoint will be calculated 8am, 2pm, 10pm +/-2 hours (for baseline calculated since admission) Calculate daily UPTD past 24 hours, Mean  $FiO_2 \times 60 \times 24 = CPTD$  (for baseline calculated since admission).

**1 UPTD is equivalent of breathing 100% oxygen at 1 atmosphere for 1 minute. E.g. 100% oxygen for 24 hours equals: 1.0 ATA x 60 min x 24 hours = 1440 UPTD**

**The following conversion table will be used to estimate UPTD**

**CPTD will be calculated as the total UPTD received during trial, calculation will be done after data is exported from eCRF at the end of study.**

|                                                                    | Type             | L/min | O <sub>2</sub> | UPTD /24h |
|--------------------------------------------------------------------|------------------|-------|----------------|-----------|
| High flow nasal or CPAP recorded as % administered                 | CPAP             | 10-50 | 100%           | 1440      |
|                                                                    | Reservoir        | 12-15 | 80%            | 1152      |
| If Hudson mask or nasal piece is used convert L/m to the following | Reservoir        | 10    | 65%            | 936       |
|                                                                    | Hudson           | 9     | 60%            | 864       |
|                                                                    | Hudson/Reservoir | 8     | 55%            | 792       |
|                                                                    | Hudson           | 7     | 48%            | 691       |
|                                                                    | Hudson           | 6     | 44%            | 633       |
|                                                                    | Hudson           | 5     | 40%            | 576       |
|                                                                    | Nasal prongs     | 4     | 33%            | 475       |



Study Code: COVID-19-HBO  
 Version No: v.4  
 Date: 2021-02-27  
 EudraCT No: 2020-001349-37

|              |   |     |     |
|--------------|---|-----|-----|
| Nasal prongs | 3 | 30% | 432 |
| Nasal prongs | 2 | 27% | 390 |
| Nasal prongs | 1 | 24% | 346 |

### ICU admission

Review of records and documented time of ICU admission and reason for admission, if/when discharge documented time and reason.

### Intubation

Review of records and documented time when the subject was intubated, reason for intubation/ invasive ventilation and time for extubation. If patient is tracheostomized, this will be noted but will be regarded as intubation. If tracheostomized, 24 hours without mechanical ventilation will be time regarded as time for stop of invasive ventilation.

### ICU mortality

Review of records and documented time and cause of death.

### Hospital mortality

Review of records and documented time and cause of death.

### Overall mortality

Review of records, documentation, dead or alive at end of study.

### Secondary infections

Review of records and document: time of diagnosis, site of infection, classified as suspected or confirmed, microorganism if known (confirmed).

### Viral load

Review of records and documented time and result from quantitative PCR.

### Staff safety

Review of hospital incidence reports, documented time and a detailed description of the event.

### Change on Pulmonary CT

Review records and document time of radiology, reason for radiology, finding. Baseline (first radiology) Categorized as mild, moderate, severe. Change from last radiology classified as improvement, deterioration or no change.

### Change on Chest X-ray

Review records and document time of radiology, reason for radiology, finding. Baseline (first radiology) Categorized as mild, moderate, severe. Change from last radiology classified as improvement, deterioration or no change.

Study Code: COVID-19-HBO  
 Version No: v.4  
 Date: 2021-02-27  
 EudraCT No: 2020-001349-37

### Lung Ultrasound (LUS) SOP and assessment

When possible, patients will be assessed with transthoracic Ultrasound to evaluate atelectasis/consolidation and pulmonary edema according to a formalized protocol Bedside Lung Ultrasound in Emergency (BLUE), which have a sensitivity and specificity of 93% respectively for interstitial syndrome (Lichtenstein, 2014). These are marked as (LUS) in the procedure list and will be marked in the eCRF if performed. 3 or more B-lines “Lung rockets” in one intercostal space will be regarded as “interstitial syndrome”. Photo or film must be saved to a usb stick or to the hospitals database in order to validate the data.

Review records and document time of LUS, reason for LUS, finding. Baseline (first LUS) Categorized as interstitial syndrome or no interstitial syndrome. Change from last LUS is classified as improvement, deterioration or no change.

Table 1. List of procedures

Visit 1-7 is 08-07:59 and Visit 8 and 9 are 7 days 08-07:59

| Activity                                          | Visit 1   | Visit 2 | Visit 3 | Visit 4 | Visit 5 | Visit 6 | Visit 7 | Visit 8 | Visit 9 |
|---------------------------------------------------|-----------|---------|---------|---------|---------|---------|---------|---------|---------|
| Day                                               | Day 1     | Day 2   | Day 3   | Day 4   | Day 5   | Day 6   | Day 7   | Day 14  | Day30   |
| Screening                                         | x         |         |         |         |         |         |         |         |         |
| Inclusion/excl criteria                           | x         |         |         |         |         |         |         |         |         |
| Pregnancy test if woman of childbearing age       | x         |         |         |         |         |         |         |         |         |
| HBO specific medical history/physical examination | x         |         |         |         |         |         |         |         |         |
| Signed Informed consent Form#                     | x         |         |         |         |         |         |         |         |         |
| Randomization                                     | x         |         |         |         |         |         |         |         |         |
| 1. Medical history                                | x         |         |         |         |         |         |         |         |         |
| 2. Demography*                                    | x         | x       | x       | x       | x       | x       | x       | x       | x       |
| 3. Concomitant medications                        | x         | x       | x       | x       | x       | x       | x       | x       | x       |
| 4. NEWS score                                     | x, x, x** | x, x, x | x, x, x | x, x, x | x, x, x | x, x, x | x, x, x | x, x, x | x, x, x |
| 5. Standard/ study specific biochemistry          | x         | x       | x       | x       | x       | x       | x       | x       | x       |
| 6. Study specific CBG/ABG***                      | x         | x       | x       | x       | x       | x       | x       | x       | x       |
| 7. Plasma (microRNA)                              | x         | x       | x       | x       | x       | x       | x       | x       | x       |
| 8. HBO specific NEWS/ CBG/ABG ††                  | 3x?       | 3x?     | 3x?     | 3x?     | 3x?     | 3x?     | 3x?     |         |         |

Study Code: COVID-19-HBO  
 Version No: v.4  
 Date: 2021-02-27  
 EudraCT No: 2020-001349-37

|                                       |   |   |   |   |   |   |   |   |   |
|---------------------------------------|---|---|---|---|---|---|---|---|---|
| 9. HBO indicated/planned              | x | x | x | x | x | x | x |   |   |
| 10. HBO treatment                     | x | x | x | x | x | x | x |   |   |
| 11. AE                                | x | x | x | x | x | x | x | x | x |
| 12. ADR                               | x | x | x | x | x | x | x | x | x |
| 13. UPTD                              | x | x | x | x | x | x | x | x | x |
| 14. CPTD                              | x |   |   |   |   |   |   |   | x |
| 15. ICU admission                     |   | x | x | x | x | x | x | x | x |
| 16. Intubation/mechanical ventilation |   | x | x | x | x | x | x | x | x |
| 17. ICU mortality                     |   | x | x | x | x | x | x | x | x |
| 18. Hospital mortality                |   | x | x | x | x | x | x | x | x |
| 19. Overall mortality                 |   | x | x | x | x | x | x | x | x |
| 20. Secondary infections              | x | x | x | x | x | x | x | x | x |
| 21. Viral load                        | x | x | x | x | x | x | x | x | x |
| 22. Staff safety (Negative events)    | x | x | x | x | x | x | x | x | x |
| 23. Pulmonary CT (check records)      | x | x | x | x | x | x | x | x | x |
| 24. Chest X-ray (check records)       | x | x | x | x | x | x | x | x | x |
| 25. Chest Ultrasound (if available)   | x | x | x | x | x | x | x | x | x |
| 26. Extended immunology (n=20)        | x |   |   | x |   |   | x | x | x |

# ICF can be obtained before visit 1\*

\* Visit 2-9 Demography check only involves change in DNR status.

\*\* Depending on time of inclusion 1-3 samples/observations will be collected during visit 1 at the specified time points. Additionally, a baseline ABG (if not available from the patient's medical records) and a baseline NEWS is collected.

\*\*\* Once daily at 8am, additional samples if warranted at the discretion of ward physician

†† Explained in detail Section 5.2.1, Visit 1 and 2-7, part b

? HBO specific NEWS (and CBG/ABG if warranted) is only collected on days of HBO treatment.

Study Code: COVID-19-HBO  
Version No: v.4  
Date: 2021-02-27  
EudraCT No: 2020-001349-37

## 5.3 Biological sampling procedures

### 5.3.1 Handling, storage, and destruction of biological samples

Standard biochemistry for kidney function, liver function, cardiac insult (TnT or Tnl), haematology and blood glucose will be collected from the hospitals electronic system and entered into the e-CRF.

Laboratory safety assessment /arterial blood gas: will be analysed in local accredited laboratories close to the patients within 15 minutes (Point of Care). Print-outs must be marked with Visit, serial number (-1h, 1h, 6h, 8am, 2pm, 10pm), subject study code, date, time and signed by the investigator. In some centres routine ABG are not collected, then capillary blood gas (CBG) will be accepted for measuring change in PO<sub>2</sub>/PCO<sub>2</sub>. Inclusion criteria must be based on ABG. Each visit will include 3x1.5ml and additional 3x1.5ml CBG/ABG for HBO during days of treatment. If CBG/ABG is taken as part of routine care at the stated time points, no additional CBG/ABG is necessary.

Study specific blood samples: Interleukin-6 (if available), Procalcitonin, HbA1C (visit1 only), insulin, Ferritin and D-Dimer will be analysed together with routine biochemistry at the accredited local lab, (applicable for sites where analyses are available locally), for most laboratories no additional blood is needed. One EDTA plasma will be bio-banked for later analysis of microRNA in plasma (if possible).

Extended immunology blood samples for 20 patients (explanatory): 2x4ml Citrate CPT-tubes for PBMC isolation, 2x4ml EDTA-tubes for extended lymphocyte analysis.

CPT-tubes will be collected by one of the investigators and transported immediately to the research laboratory where PBMCs are isolated, half are prepared with RNA-later® for later DNA/RNA extraction and gene expression analysis and the other half is cryopreserved for later functional analysis of the monocytes. The monocytes and EDTA plasma will be stored in a sub-biobank at Bioclinicum Karolinska University Hospital. The biological samples will be saved until all analyses are performed.

### 5.3.2 Total volume of blood per subject

Since most of the blood taken are routine samples for COVID-19, only maximum additional 16 ml (8 ml for all and additionally 8ml for 20 subjects) will be collected. The ABG will depend on the number of HBO treatments, 4.5ml/ treatment, maximum 22.5 ml, if five HBO treatments are given. Maximum 105 ml blood is collected if five HBO treatments are given, for control group 85ml blood. This needs to be related to routine blood samples taken in these critically ill patients that is normally 16-28 ml/day, 480-840 ml over 30 days.

### 5.3.3 Biobank

Study specific EDTA plasma and PBMC collected in Sweden in this study are released to *Karolinska Institute Biobank (IVO reg. no 222)* and handled according to the current biobank laws and regulations. A national agreement is approved by *Regionalt biobanksentrum Stockholm-Gotland*. The samples are coded/pseudonymized to protect the subject's

1 Study Code: COVID-19-HBO  
2 Version No: v.4  
3 Date: 2021-02-27  
4 EudraCT No: 2020-001349-37  
5  
6

7 identification. All samples and the identification/code list are stored securely and separately to  
8 prevent unauthorized persons from having access to them.  
9

## 10 5.3 End of Study

11 The end of study is defined as the last participant's last follow up.

12 Premature termination of this clinical study may occur because of a regulatory authority  
13 decision or at the discretion of the sponsor.

14 The sponsor reserves the right to discontinue the study at any time point in the trial in the  
15 following cases:

- 16 • Unexpected high proportion of AEs that are possibly or probably related to the study drug.
- 17 • Study protocol is difficult to cope with.
- 18 • Recruitment of eligible subjects is far too low.

19 Criteria for premature termination are strict and follow the Haybittle-Peto recommendation with  
20 a statistical significance of  $p < 0.001$ .

21 The end of the study will be reported to the regulatory authority within 90 days, or 15 days if  
22 the study is terminated prematurely. The Investigators will inform participants and ensure that  
23 the appropriate follow up is arranged for all involved.  
24  
25

## 26 6. Subject selection

### 27 6.1 Inclusion criteria:

28 To be included in the study, subjects must meet the following criteria:

- 29 1) Aged 18-90 years
- 30 2)  $\text{PaO}_2/\text{FiO}_2$  (PFI) below 200 mmHg (26.7 kPa) (Based on ABG measurement),  
31 assessed if (~5L oxygen/min to reach 90%  $\text{SpO}_2$ )
- 32 3) Suspected or verified SARS-CoV-2 infection
- 33 4) At least two risk factors for increased morbidity/mortality
  - 34 • Age above 50 years
  - 35 • Hypertension
  - 36 • Cardiovascular disease
  - 37 • Diabetes or pre-diabetes
  - 38 • Active or cured cancer
  - 39 • Asthma/COPD
  - 40 • Smoking
  - 41 • D-Dimer > 1.0
  - 42 • Auto-immune disease
- 43 5) Documented informed consent according to ICH-GCP and national regulations

1 Study Code: COVID-19-HBO  
2 Version No: v.4  
3 Date: 2021-02-27  
4 EudraCT No: 2020-001349-37  
5  
6

## 7 6.2 Exclusion criteria:

8 Subjects must not be included in the study if any of the following criteria are met:

- 9
- 10 1) ARDS/pneumonia caused by other viral infections (positive for other virus).
  - 11 2) ARDS/pneumonia caused by other non-viral infections or trauma.
  - 12 3) Known pregnancy or positive pregnancy test in women of childbearing age.
  - 13 4) Patients with previous lung fibrosis more than 10% (verified by CT).
  - 14 5) CT- or Spirometry-verified severe COPD with Emphysema.
  - 15 6) Contraindication for HBO according to local guidelines.
  - 16 7) Not likely to need ICU admission within 7 days of screening (Subjective criteria that  
17 may exclude any patients that fulfil the other inclusion criteria but where the treating  
18 physician suspect a spontaneous recovery).
  - 19 8) Mental inability, reluctance or language difficulties that result in difficulty understanding  
20 the meaning of study participation.
  - 21 9) Prisoners.
  - 22 10) Unable/risk to move patients to hyperbaric chamber.
- 23  
24  
25  
26  
27  
28  
29

## 30 6.3 Screening

31 Patients with respiratory symptoms admitted to the hospital will be pre-screened by ward  
32 physicians or study officials. Subjects will be informed in detail about the trial by an  
33 investigator. After obtaining a written informed consent, additional medical record review,  
34 physical examination and (pregnancy test if applicable) will be conducted. Subject eligibility  
35 (that subjects fulfill all inclusion criteria and do not meet any exclusion criteria) is established  
36 before randomization to treatment.  
37  
38  
39  
40

## 41 6.4 Withdrawal Criteria

42 Patient participation

43 A patient will be considered to have completed the study when he or she completes the  
44 assessment at day 30. Patients should be encouraged to complete the study but have the  
45 right to make a decision regarding study participation e.g. to discontinue the study treatment,  
46 but still come on visits or discontinue study drug and not come on further study visits. The  
47 patient has no obligation to explain why he/she does not want to continue. The investigator  
48 has the right to stop the patient's treatment in the event of AE, protocol deviations,  
49 administrative reasons or other reasons. It is understood by all concerned that an excessive  
50 rate of discontinues can render the study un-interpretable. Therefore, unnecessary  
51 discontinuation should be avoided.  
52

53 Irrespective of the reason for not continuing in the study and whenever possible, the patient  
54 should be examined. Relevant laboratory test samples should be obtained and all relevant  
55 assessments should be completed, if applicable.

56 All AEs should be followed up until they have returned to baseline status or stabilised.  
57  
58  
59  
60

1 Study Code: COVID-19-HBO  
2 Version No: v.4  
3 Date: 2021-02-27  
4 EudraCT No: 2020-001349-37  
5

6 A final visit in the electronic case report form (eCRF) should be completed for every  
7 randomised patient, whether the patient completed the study or not. The reason for any early  
8 discontinuation should be indicated on this form.  
9

10 Patients may be discontinued from the study at the discretion of the Investigator. Specific  
11 reasons for discontinuing a patient from further assessments are:  
12

- 13 • AE: Clinical or laboratory events that in the judgment of the investigator, Data Safety  
14 Monitoring Board (DSMB) or the Sponsor and in the best interest of the patient  
15 constitute grounds for discontinuation. This includes serious and non-serious AE  
16 regardless of relation to study drug.  
17
- 18 • Withdrawal of Consent: If a patient withdraws consent for disclosure of future  
19 information at the discontinuation of the study or after completion of the study, no  
20 further evaluations should be performed and no additional data should be collected.  
21 The Sponsor may retain and continue to use data collected before patient withdrew  
22 his/her consent. The Withdraw Consent reason is only applicable if the patient denies  
23 any further contact with site and no further data collection.  
24
- 25 • Lack of Efficacy/Treatment Failure: Patients experiencing deterioration or no  
26 improvement regarding symptoms, as judged by the investigator, may be discontinued  
27 from the study at any time during the study, offered alternative treatment and scored  
28 as treatment failures. Treatment failures include disease worsening, requirement for  
29 rescue medication for treatment of UC, requirement for surgical intervention and study  
30 drug related AE. Patients may be discontinued for sustained non-response at the  
31 discretion of investigator.  
32
- 33 • Protocol Violation: The patient's findings, or conduct, fails to meet protocol entry criteria  
34 or fails to adhere to the protocol requirements making it impossible to derive sound  
35 scientific or medical conclusions from the primary endpoint data generated on a  
36 subject, (e.g. Failure to give first HBO treatment within 24h of Randomization).  
37
- 38 • Lost to Follow-Up: The patient does not show up for further visits and study personnel  
39 can't reach the patient.  
40
- 41 • If the subject is tested negative for SARS-CoV-2 after randomization and no previous  
42 positive test that can explain the symptoms is available, the subject is withdrawn.  
43
- 44 • Other: Termination of other reason  
45

46 If the subject discontinues the study, follow-up of this subject is to be performed according to  
47 the clinic's routine and will be included in the Safety population, if he/she had received at least  
48 one treatment.  
49

## 50 7. Study treatments

### 51 7.1 Description of investigational product(s)

52 Oxygen 100%, Medical grade  
53  
54  
55  
56  
57  
58  
59  
60

1 Study Code: COVID-19-HBO  
2 Version No: v.4  
3 Date: 2021-02-27  
4 EudraCT No: 2020-001349-37  
5  
6

## 7.2 Dose and administration

7  
8  
9 Hyperbaric oxygen 1.6-2.4 ATA for 30-60 minutes (with 5-15 min compression time and 5-15  
10 minutes decompression time, according to local routines). The number of treatments and  
11 timing will depend on available resources and clinical efficacy at the discretion of the attending  
12 physician, with the recommended starting dose being 30 minutes at 2.4 ATA. If the patient  
13 does not respond in any way to 30 min the first day, depending on available resources, the  
14 attending physician may choose to increase the duration from day 2. The profile recommended  
15 by the Sponsor is 2.4 Bar: 60min including 5 min airbrake: 10 min compression/  
16 decompression). No treatment must be given after day 7 (Visit 7), maximum 5 treatments can  
17 be given during the first 7 days.  
18  
19

## 7.3 Packaging, labeling, and handling of investigational products(s)

20  
21  
22  
23  
24  
25 Compressed from tanks marked 100% Oxygen for medical use or cryogenic gas from hospital  
26 supply system depending on local routines. There will be no study specific packaging or  
27 labeling.  
28  
29

## 7.4 Drug accountability and treatment compliance

30  
31  
32 HBO is delivered inside a hyperbaric chamber by inhaling 100% oxygen through a tight  
33 facemask attended by medical staff. If the mask is tight the inspired oxygen pressure is 234,7-  
34 240kPa (range depending on 100% saturated - dry gas) at 240 kPa pressure, hence there is  
35 no uncertainty about compliance. During compression/decompression patients may need to  
36 remove the mask in order to equalize the middle ears and the time might differ according to  
37 local protocols. The difference in dose during this period is therefore not counted into the  
38 treatment time. If there is no obvious effect of 30 minutes after the first treatment, the attending  
39 physician may extend the duration from session 2. That would include five minutes of  
40 breathing air for each 30 minutes at pressure. The time of treatment will be recorded in the  
41 eCRF.  
42  
43  
44

## 7.5 Randomization

45  
46  
47  
48  
49  
50  
51  
52  
53  
54  
55  
56  
57  
58  
59  
60  
Subjects will be enrolled and randomized consecutively as they are found to be eligible for  
inclusion in the study. HBO treatment will start within 24 hours of randomization.

If a subject discontinues their study participation, their subject code will not be reused, and  
the subject will not be allowed to re-enter the study again. There will be no replacement for  
these subjects.

Eligible subjects will be randomized in a 1:1 allocation, stratified by site and gender in blocks  
(blinded to all but the randomizing CRA) to either HBO or Control. There will be a computer  
generated randomization.

This is an open-label study where patients and investigator will not be blinded to study  
treatment.



1 Study Code: COVID-19-HBO  
2 Version No: v.4  
3 Date: 2021-02-27  
4 EudraCT No: 2020-001349-37  
5  
6

## 7.6 Concomitant Medication

7 Medications that are considered necessary for the safety and well-being of the subject can be  
8 given at the discretion of the investigator, unless otherwise specified as an exclusion criterion.

9 All medications that the patient is prescribed and has taken during the study must be recorded  
10 in the eCRF. Any changes need to be reported.

## 7.7 Treatment after study end

11 After the first seven days no further HBO treatment is to be administered. However normobaric  
12 oxygen administration can continue if needed. The total dose during the study will be recorded  
13 until and including day 30. After the study ends, the participants will be treated according to  
14 routine clinical praxis.

# 8. Handling of Adverse Events

## 8.1 Definitions

### 8.1.1 Adverse Event (AE)

15 Adverse Event (AE): Any untoward medical occurrence in a clinical investigation subject  
16 administered a medicinal product and, which does not necessarily have a causal relationship  
17 with the treatment, can be an unfavorable and unintended sign (including an abnormal  
18 laboratory discovery), symptom or disease temporally associated with the use of the medicinal  
19 (investigational) product, whether or not related to the medicinal (investigational) product.

### 8.1.2 Adverse Reaction (AR)

20 In the new use of a medicinal product, all noxious and unintended reactions to the medicinal  
21 product related to any dose should be considered an adverse reaction (AR). The phrase  
22 “reaction” to a medicinal product means that the causal relationship between the medicinal  
23 product and an adverse event is at least a reasonable possibility, that is the relationship cannot  
24 be ruled out.

### 8.1.3 Serious Adverse Event (SAE)

25 Serious adverse event (SAE): Any untoward medical occurrence that at any dose:

- 26 • results in death
- 27 • is life-threatening
- 28 • requires inpatient hospitalization or prolongation of existing hospitalization
- 29 • results in persistent or significant disability or incapacity
- 30 • results in a congenital anomaly/malformation
- 31 • regarded as medically important without meeting the above mentioned criteria

1 Study Code: COVID-19-HBO  
2 Version No: v.4  
3 Date: 2021-02-27  
4 EudraCT No: 2020-001349-37  
5

6 Medical and scientific assessment will be made to determine if an event is “serious” and  
7 whether it would prompt reporting in other situations, for example important medical events  
8 that may not be directly life-threatening or result in death or hospitalization but may  
9 compromise the study subject or may require intervention to prevent one of the other results  
10 set forth in the definitions above. These should also normally be considered as SAEs.  
11  
12

### 13 8.1.4 Suspected Unexpected Serious Adverse Reaction (SUSAR)

14 SUSAR: A reaction/event that is unexpected, serious, and suspected to be caused by the  
15 treatment, i.e. adverse events that are not included in the SPC.  
16  
17

## 18 8.2 Assessment of Adverse Events

### 19 8.2.1 Assessment of causal relationship

20 The investigator is responsible for determining whether there is a causal relationship between  
21 the AE/SAE and the use of the investigational product.  
22

23 Those AEs which are suspected of having a relationship to the investigational product will be  
24 followed up until the subject has recovered or is well taken care of and on their way to good  
25 recovery (see also section 8.4, Follow-up of Adverse Events).  
26

27 All AEs will be categorized either as related, probably related, possibly related, unlikely related  
28 or not related, in accordance with the definitions below:  
29

30 **Related:** Clinical event, including abnormal results from laboratory analyses, occurring in a  
31 plausible temporal sequence in relation to drug administration. The observed event matches  
32 with the known adverse reactions scheme for the drug involved. The event cannot be  
33 attributed to underlying disease or other medications.  
34

35 **Probably related:** Clinical event, including abnormal results from laboratory analyses,  
36 occurring within a reasonable time after administration of the investigational product. The  
37 observed event match with the known adverse reactions scheme for the drug involved. It is  
38 unlikely attributable to underlying disease or other drugs.  
39

40 **Possibly related:** Clinical event, including abnormal results from laboratory analyses,  
41 occurring within a reasonable time after administration of the intervention/investigational  
42 product. The event could be explained by the investigational product and its emergence is  
43 reasonable in relationship with use of the investigational product, but there is insufficient  
44 information to determine the relationship. The event could be explained by an underlying  
45 disease or other medications.  
46

47 **Unlikely related:** Clinical event, including abnormal results from laboratory analyses, with a  
48 temporal relationship with respect to drug exposure that makes a relationship  
49 improbable (but not impossible). The event could be plausibly explained by an underlying  
50 disease or other medications.  
51

52 **Not related:** Clinical event, including abnormal results from laboratory analyses that do not  
53 meet any of the above criteria for relatedness.  
54  
55  
56  
57  
58  
59  
60

1 Study Code: COVID-19-HBO  
2 Version No: v.4  
3 Date: 2021-02-27  
4 EudraCT No: 2020-001349-37  
5  
6

## 7 8.2.2 Assessment of intensity

8 Each adverse event shall be classified by an investigator as mild, moderate or severe.

9 **Mild:** The adverse event is relatively tolerable and transient in nature but does not affect the  
10 subject's normal life.  
11

12 **Moderate:** The adverse event causes deterioration of function but is transient. The event can  
13 be sufficiently unpleasant and need additional treatment with supplement oxygen and/or non-  
14 invasive ventilation.  
15

16 **Severe:** The adverse event causes deterioration of function to the extent that the subject  
17 needs intubation/ICU admission or is immediately life threatening.  
18  
19

## 20 8.2.3 Assessment of seriousness

21 The investigator is responsible for assessing the seriousness (serious or non-serious). If the  
22 incident is considered serious, this should be reported as a serious adverse event (SAE) by  
23 the investigator to the sponsor. See also section 8.3.2, Reporting of Serious Adverse Events  
24 (SAE).  
25  
26  
27  
28

## 29 8.3 Reporting and registration of Adverse Events

30 At each study visit, adverse events (AE) are registered. Collection of AE will start directly after  
31 an Informed Consent is signed and continue up to and including day 30 (Visit 9), which is a  
32 minimum of 23 days after the subject has ended their treatment with the investigational  
33 product. All AE that occur during the study and which are observed by the investigator/study  
34 nurse or reported by the subject will be registered in the eCRF regardless of whether they are  
35 related to the investigational product or not. Assessment of causal relationship, severity, and  
36 whether the AE is considered to be an SAE or not will be done by the investigator directly in  
37 the eCRF. At minimum, for each AE/SAE, a description of the event is recorded  
38 (diagnosis/symptom if diagnosis is missing), start and stop times, causal relationship, severity,  
39 if the AE is considered to be an SAE or not, measures and outcome.  
40  
41  
42  
43

44 Due to the clinical course of the disease in COVID-19 the following situations will not be  
45 reported as AE/SAE:

- 46 • A desaturation that can be solved on the ward with additional oxygen only will not be  
47 recorded as an AE.
- 48 • Desaturation that is transient and can be solved without involvement of  
49 ICU/Emergency outreach including Mobile Intensive Group (MIG) or Medical  
50 Emergency Team (MET) will not be considered as an SAE. Any desaturation that need  
51 CPAP/NIV will be considered as an AE irrespective of Emergency/ICU involvement  
52 unless present at inclusion.
- 53 • Any change in routine biochemistry will not be reported as AE
- 54 • Change in PaO<sub>2</sub> and PaCO<sub>2</sub> on ABG will be reported as an AE only if the change leads  
55 to a medically significant increase of oxygen and/ or change from a lower level mode  
56  
57  
58  
59  
60

1 Study Code: COVID-19-HBO  
2 Version No: v.4  
3 Date: 2021-02-27  
4 EudraCT No: 2020-001349-37  
5

6 of oxygen delivery (nasal prongs/Hudson Mask>High flow cannula/Non-invasive  
7 ventilation>Invasive ventilation  
8  
9

### 10 8.3.1 Reporting of Adverse Events (AE)

11 All AEs to be reported shall be registered in the eCRF continuously.  
12  
13  
14

### 15 8.3.2 Reporting of Serious Adverse Events (SAE)

16 Serious adverse events (SAE) are reported to the sponsor on a special SAE form (included in  
17 the eCRF) within 24 hours of the investigator being informed of the SAE.  
18  
19

20 Follow-up information describing the outcome and handling of the SAE is reported as soon as  
21 this information is available.  
22

23 The sponsor will in a timely manner assess whether the adverse event was expected for the  
24 investigational product or not, using the reference safety information. Serious AEs must be  
25 collected, registered in the CRFs and an assessment of causality of the SAE should be  
26 performed. Also, discontinuations due to AEs will be collected.  
27  
28

### 29 8.3.3 Reporting of Suspected Unexpected Serious Adverse Reactions 30 (SUSAR)

31 Those SAE in Sweden which are assessed by sponsor to be SUSAR are reported via a [CIOMS](#)  
32 [form](#) to the MPA that are submitting the CIOMS report to the to the European Medicines  
33 Agency (EudraVigilance database) according to the specified time frames.  
34  
35

36 SUSAR that are fatal or life-threatening are reported as soon as possible and no later than  
37 seven days after the incident has become known to the sponsor. Relevant follow-up  
38 information is sent thereafter within an additional eight days. Other SUSAR are reported as  
39 soon as possible and no later than 15 days after they have come to the sponsor's knowledge.  
40  
41

42 Any SUSAR will also be notified to the EPM by the sponsor.  
43

44 Information about SUSAR occurring during the study is compiled by the sponsor and sent out  
45 to the principal investigator at all participating centers in connection to the event.  
46

47 SUSARs in other participating countries will be reported to respective CA and EC according  
48 to applicable procedures  
49  
50

## 51 8.4 Follow-up of Adverse Events

52 All AEs should be followed up until they have returned to baseline status or stabilized. AEs  
53 suspected to have a causal relationship with the study intervention are followed until recovered  
54 or until the subject is on good way to recovery  
55  
56  
57  
58  
59  
60

1 Study Code: COVID-19-HBO  
2 Version No: v.4  
3 Date: 2021-02-27  
4 EudraCT No: 2020-001349-37  
5  
6

## 7 8.5 Safety Report (Development Safety Update Report, DSUR)

9 During the study period, an annual Development and Safety Update Report (DSUR) will be  
10 submitted to the competent authorities and ethics committees in all participating countries.  
11

12 The report includes a summary of all reported SAEs and SUSARs, a summarized safety  
13 assessment for study subjects and information regarding potential updates of the risk-benefit  
14 assessment since study approval.  
15  
16

## 17 8.6 Procedures in case of emergencies

18 The sponsor and investigator are obliged to immediately take the urgent safety measures  
19 necessary to protect the subjects from immediate danger. Examples of such measures are to  
20 temporarily suspend the clinical trial or to introduce supplementary monitoring measures. The  
21 sponsor shall inform the applicable competent authorities and ethics committees as soon as  
22 possible about the urgent safety measures taken by the investigator or sponsor.  
23  
24  
25  
26

## 27 8.7 Reference Safety Information

28 For reference safety information, reference is given in the SmPC.  
29  
30  
31

# 32 9. Statistics

## 33 9.1 Statistical Analysis Plan

34 The principal features of the statistical analysis of the data are described in this section. A  
35 more technical and detailed elaboration of the principal features will be written in a separate  
36 Statistical Analysis Plan (SAP).  
37  
38  
39  
40  
41  
42  
43  
44  
45  
46  
47  
48  
49  
50  
51  
52  
53  
54  
55  
56  
57  
58  
59  
60

1 Study Code: COVID-19-HBO  
2 Version No: v.4  
3 Date: 2021-02-27  
4 EudraCT No: 2020-001349-37  
5  
6

## 7 9.1.1 Analysis population

### 8 9.1.1.1 Definition of Study Populations

9  
10 9.1.1.2 Intent-to-Treat Population (Full Analysis Set); All randomized subjects  
11 will be included in the Intent-to-Treat (ITT) population.  
12

13 9.1.1.3 Per-Protocol Population; All randomized subjects with no major protocol  
14 violations will be included in the Per Protocol (PP) population. The final  
15 decisions regarding the PP population will be taken at the Clean File  
16 meeting before the database lock.  
17  
18

19 9.1.1.4 Safety Population; All randomized subjects will be included in the safety  
20 population.  
21  
22

## 23 9.2 Statistical analyses

### 24 9.2.1 Sample size calculations

25  
26 Power calculation is challenging in COVID-19 since hospitalization and mortality rates differ  
27 enormously between publications and seem to be highly variable between different countries.  
28 Mortality rates have been reported as high as 90% in patients developing ARDS in early  
29 reports from Wuhan province and more recent reports has reported overall 28-d mortality rates  
30 of 61,5% in ICU patients with acute respiratory illness (Yang et al., 2020a) In a recent  
31 retrospective cohort study from Wuhan 19% of hospitalized patients needed mechanical  
32 ventilation or ECMO, of whom 97% died, SIC! 26% was admitted to the ICU and hospital  
33 mortality rate was 28%(Zhou et al., 2020). Mortality rates in ARDS in general are until now  
34 decreasing but still very high. A recent systemic overview reported mortality rates since 2010:  
35 Overall rates of in-hospital- 45%, ICU- 38% and 28/30-d- 30% (Maca et al., 2017). With our  
36 inclusion and exclusion criteria we believe that we can select patients at risk for ICU admission,  
37 intubation, morbidity and mortality.  
38  
39

40 The primary endpoint, ICU admission, is defined by criteria for selection for ICU.  
41  
42

43 We have assumed that 50% of the subjects will have at least one criteria during the course of  
44 the study and we aim to reduce the ICU admission rate by 40%, i.e. to an ICU admission rate  
45 of 30%. To achieve 80% power with type-I error rate of 0.05, a sample size of 93 subjects per  
46 group is required (two-sided). We plan to enrol 200 subjects into this trial. Interim analyses  
47 may decide to re-calculate the sample-size for the trial.  
48  
49

50 The sample size calculation was done in nQuery version 7.  
51  
52

### 53 9.2.2 General statistical methodology

54 Primary and secondary endpoints will be evaluated using the ITT population and the primary  
55 endpoint also using the PP population.  
56  
57  
58  
59  
60

1 Study Code: COVID-19-HBO  
2 Version No: v.4  
3 Date: 2021-02-27  
4 EudraCT No: 2020-001349-37  
5  
6

### 7 9.2.3 Patient Demographic and Baseline Characteristics

8 Baseline values and patient characteristics will be presented in tables by group and in total.  
9 All continuous variables will be described using standard statistical measures, i.e., number of  
10 observations, mean and median value, standard deviation, minimum and maximum value. All  
11 categorical variables will be summarised in frequency tables.  
12  
13

### 14 9.2.4 Primary Endpoint Analysis

15 The analysis of the primary endpoint is conducted on the FAS and PPS.

16 The primary analysis of the primary endpoint will be performed using the Cochran Mantel  
17 Haenszel test adjusting for randomisation strata site and gender.

18 The primary endpoint will be analysed for the proportion of patients with ICU admission using  
19 an overall type I error rate of 0.05, using a two-sided test.

20 The p-value for testing the null hypotheses, no difference between treatment groups, must be  
21 less than 0.05 to be considered to have met the primary objective.

22 There will be no adjustment for multiplicity as there is only one primary endpoint.  
23  
24

### 25 9.2.5 Secondary Endpoints Analysis

26 The same analysis approach used for the primary efficacy endpoint will be applied to the  
27 secondary efficacy and exploratory endpoints referred to as a "Proportion endpoints".

28 Continuous endpoints such as mean change from baseline will be evaluated using the  
29 ANCOVA, including the treatment and stratifying factor as fixed factors and the baseline as a  
30 covariate in the model.

31 The time-to-event endpoints will be presented using the Kaplan-Meier method and the test  
32 between treatment groups will be done using the log-rank test.

33 The p-value for testing the null hypotheses, no difference between treatment groups, must be  
34 less than 0.05 to be considered to have met the objective.

35 No multiplicity adjustments will be made for the exploratory endpoints. Handling of secondary  
36 efficacy endpoints will be described in detail in the statistical analysis plan.

37 All analysis will be done for the FAS population.  
38  
39

### 40 9.2.6 Safety analyses

41 Safety analyses will be performed on the Safety population.  
42  
43

#### 44 9.2.6.1 Analysis of Adverse Events

45 The number and percentage of patients reporting AEs, and the number of AEs reported will  
46 be presented. The events will be tabulated by system organ class and preferred term. In  
47 addition, summaries by relationship to study drug and severity will be presented. SAEs will  
48 also be presented in separate tabulations.  
49  
50  
51  
52  
53  
54  
55  
56  
57  
58  
59  
60

1 Study Code: COVID-19-HBO  
2 Version No: v.4  
3 Date: 2021-02-27  
4 EudraCT No: 2020-001349-37  
5

6 The number of patients experiencing an AE will be compared descriptively between groups.  
7 All patients with AEs will be listed individually with patient number in addition to type of  
8 event, start and stop time, duration, seriousness, severity, action taken, relationship to  
9 study drug and outcome of AE.  
10

#### 11 9.2.6.2 Other Safety Assessments

12 All continuous safety variables, such as laboratory measurements, vital signs, ECG  
13 parameters, and body weight will be described using summary statistics. Changes from  
14 baseline will also be summarised as appropriate.  
15

16 All categorical variables, such as physical examination, will be summarised using  
17 frequencies and percentages.  
18

19 The safety will include laboratory safety variables and/or adverse clinical findings as  
20 appropriate. Laboratory data will also be presented in shift tables for selected parameters,  
21 where the number of values within, below and above laboratory reference range will be  
22 displayed.  
23

24 Interim analyses will be conducted after 20 and 70 subjects for safety variables, SAE and  
25 AE.  
26

#### 27 9.2.7 Interim Analysis

28 Safety will be monitored continuously by the safety monitoring board throughout the trial.  
29

30 There will be an interim analysis performed after 70 subjects have available data for the  
31 primary endpoint. The purpose for the interim analysis is to stop for futility if efficacy has not  
32 been established. Also, if there is an evidence of a superior efficacy with a delta of 20 % or  
33 more, the study will continue with a 2:1 randomisation.  
34

35 A data and safety monitoring board will perform the interim analysis. A separate DSMB  
36 protocol will be created.  
37

#### 38 9.2.8 Handling of Dropouts and Missing Data

39 For the efficacy analyses, missing data will in general be replaced using the non-responder  
40 imputation (NRI). NRI will be used where missing data are replaced with a negative outcome,  
41 i.e. interpreted as a non-responder to the intervention, and sensitivity analysis using alternative  
42 methods for replacement of missing data may be considered and will be specified in the  
43 statistical analysis plan.  
44

## 45 10. Quality Control and Quality Assurance

### 46 10.1 Quality Assurance and Sponsor oversight

47 Steps to be taken to ensure the accuracy and reliability of data include the selection of qualified  
48 investigators and appropriate study centers, review of protocol procedures with the site  
49  
50



1 Study Code: COVID-19-HBO  
2 Version No: v.4  
3 Date: 2021-02-27  
4 EudraCT No: 2020-001349-37  
5  
6

7 personnel before the study. eCRF completion guidelines will be provided and reviewed with  
8 study personnel before the start of the study.  
9

## 10 10.2 Monitoring

11 The study will be monitored by an independent monitor before the study begins, during the  
12 study conduct, and after the study has been completed, so as to ensure that the study is  
13 carried out according to the protocol and that data is collected, documented, and reported  
14 according to ICH-GCP and applicable ethical and regulatory requirements. Monitoring is  
15 performed as per the study's monitoring plan and is intended to ensure that the subject's rights,  
16 safety, and well-being are met as well as data in the CRF are complete, correct, and consistent  
17 with the source data. The monitoring will be performed by an independent experienced monitor  
18 qualified in ICH GCP, applicable national and international regulations and the Declaration of  
19 Helsinki.  
20  
21  
22  
23

## 24 10.3 Source data

25 The investigator must keep source documents for each subject in the study. Data in the eCRF  
26 can be source data, such as for certain demography parameters, sampling of study specific  
27 blood samples and assessment of AEs. A document describing what has been classified as  
28 source data in the study should be included in the Investigator Site File (ISF). The investigator  
29 must ensure that all source documents are accessible for monitoring and other quality control  
30 activities.  
31  
32  
33  
34

35 Source data is defined before study start at each individual site.  
36  
37

## 38 10.4 Deviations or serious breaches

39 Serious breaches and deviations from the study protocol, GCP and other regulations that  
40 significantly and directly affects, or with high likelihood could affect, the subjects in Sweden or  
41 the scientific value of the study, shall be immediately reported within 7 days (from knowledge)  
42 to the Swedish MPA. It is the sponsor's responsibility to judge the consequences of deviations  
43 that have occurred, and thus also to decide whether the Swedish MPA should be informed.  
44  
45

46 Serious breaches in other participating countries will be reported according to national  
47 procedures.  
48  
49

50 For major protocol deviations i.e violations see also section 6.4.

51 Minor deviations that do not affect subjects' integrity or safety, nor significantly affect the  
52 study's scientific value, are documented in the study documentation of the principal  
53 investigator and the sponsor.  
54  
55

## 56 10.5 Audits and inspections

57 Authorized representatives for the sponsor and Competent Authorities (CA) may carry out  
58 audits or inspections at the study site, including source data verification. The investigator must  
59  
60

Study Code: COVID-19-HBO  
 Version No: v.4  
 Date: 2021-02-27  
 EudraCT No: 2020-001349-37

ensure that all source documents are available for audits and inspections. The purpose of an audit or inspection is to systematically and independently review all study-related activities and documents, so as to determine whether these activities were performed, registered, analyzed and reported correctly according to protocol, Good Clinical Practice (GCP) and applicable regulations.

## 10.6 Data Safety Monitoring Board

An independent DSMB will evaluate the safety data in the context of the overall trial and the currently existing information about the study drug. The DSMB will be composed of representatives from and experts in their respective disciplines of medicine, statistics and clinical trial methodology and conduct.

The DSMB will review the data during the course of the study, as specified in table 2 below, and will draw up a charter delineating their guidelines for operating and stopping rules for terminating individual patients, a portion or all of the trial prematurely. However, the DSMB may for any safety concerns recommend stopping of the trial even if these criteria are not fulfilled. It is the responsibility of the Sponsor to decide whether premature end of study will be made, based on the advice provided by the DSMB.

The DSMB will have access to all trial data. It may request and will be provided with whatever data is deemed necessary or useful for it to carry out its duties. The data provided will be blinded to treatment group unless specific unblinding is requested by the DSMB.

**Table 2. DSMB meeting schedule**

|                         | <b>Time of meeting</b>                        |
|-------------------------|-----------------------------------------------|
| Before study start      | Before first subject is included              |
| Safety Interim analysis | When 20 subjects have completed visit 9       |
| Interim analysis        | When 70 subjects have completed visit 9       |
| End of the study        | Last visit has been done by the last patient. |

## 10.7 Data protection

If any part of the data is handled by any other organization, inside or outside the EU, appropriate agreements and/or other documentation will be established, to ensure that the data processing is performed in accordance with the provisions of the General Data Protection Regulation (GDPR) and other relevant legislation, before any data transfer takes place.

The content of the informed consent form complies with relevant integrity and data protection legislation. In the subject information and the informed consent form, the subject will be given complete information about how collection, use and publication of their study data will take place. The subject information and the informed consent form will explain how study data are stored to maintain confidentiality in accordance with national data legislation. All information processed by the sponsor will be pseudonymized and identified with a Study ID.

1 Study Code: COVID-19-HBO  
2 Version No: v.4  
3 Date: 2021-02-27  
4 EudraCT No: 2020-001349-37  
5

6 The informed consent form will also explain that for verification of the data, authorized  
7 representatives of the sponsor, as well as relevant authority, may require access to parts of  
8 medical records or study records that are relevant to the study, including the subject's medical  
9 history.  
10

## 11. Ethics

### 11.1 Compliance to the protocol, GCP and regulations

11 The study will be performed in compliance with the study protocol, the Declaration of Helsinki,  
12 ICH-GCP (Good Clinical Practice) guidelines and current national and international  
13 regulations governing this clinical trial. This is to ensure the safety and integrity of the study  
14 subjects as well as the quality of the data collected.  
15

### 11.2 Ethical review of the study

16 The final study protocol for clinical trials must be approved, as a part of the application for a  
17 permit for clinical trials, by both the Swedish Ethical Review Authority  
18 (Etikprövningsmyndigheten, EPM) and the Swedish Medical Products Agency (MPA) before  
19 the trial can be conducted. The final version of the informed consent form and other information  
20 provided to subjects, must be approved or given a written positive opinion by EPM. EPM and  
21 the Swedish Medical Products Agency must be informed of any changes in the study protocol  
22 in accordance with current requirements. Each trial site outside Sweden must apply for ethical  
23 approval by their local ethics committee and national competent authority and the subject written  
24 information and consent form must be provided in the local language.  
25

### 11.3 Procedure for obtaining informed consent

26 The principal investigator at each site shall ensure that the subject is given full and adequate  
27 oral and written information about the study, its purpose, any risks and benefits as well as  
28 inclusion and exclusion criteria. Subjects must also be informed that they are free to  
29 discontinue their participation in the study at any time without having to provide a reason.  
30 Subjects should be given the opportunity to ask questions and be allowed time to consider the  
31 provided information. If the person chooses to participate, both the subject and the investigator  
32 shall sign the informed consent form. A copy of the subject information as well as the informed  
33 consent form shall be provided to the subject. The subject's signed and dated informed  
34 consent must be obtained before performing any study-specific activity in the study. Each  
35 subject who participated in the study will be identified by a subject number on a subject  
36 identification list. The subject agrees that monitors, auditors, and inspectors may have access  
37 to their medical records and other source data. If new information is added to the study, the  
38 subject has the right to reconsider whether he/she will continue their participation.  
39

40 Due to the risk of spreading the infection the consent form needs to be signed by the subject  
41 and the investigator inside the room. The signed form will be photographed (scanned), and  
42

1 Study Code: COVID-19-HBO  
2 Version No: v.4  
3 Date: 2021-02-27  
4 EudraCT No: 2020-001349-37  
5  
6

7 the original will stay with the subject. The digital copy will then be printed and contra-signed  
8 by the investigator outside the room and then regarded as the original (source data), the  
9 original paper will stay with the subject. The digital copy will be destroyed at the latest at the  
10 end of the study. The subject can ask for a new copy of the source data once he/she recovers.  
11  
12

## 13 12. Insurances

14  
15 Study subjects are covered by the patient injury insurance and the Swedish pharmaceutical  
16 insurance for Swedish sites. Sites outside Sweden must specify what insurance apply in their  
17 country/site before any subjects can be enrolled in the study.  
18  
19

## 20 13. Substantial changes to the study

21 Substantial changes to the signed study protocol are only possible through approved protocol  
22 amendments and by agreement from all responsible persons. Information on non-substantial  
23 changes should be clearly noted in the amended protocol.  
24  
25

26  
27 In the event that substantial changes to the protocol (e.g., changing of the main objective,  
28 primary or secondary variables, method to measure the primary variable, changing of the  
29 investigational product or dosage) will be made during the course of the study, approval from  
30 the national competent authority and ethics committee shall be obtained before any changes  
31 are implemented in that country. A change that concerns a new site, new investigator or a new  
32 study patient information sheet shall only be approved by the ethics committee, as applicable.  
33  
34

35  
36 Non-substantial changes will be recorded and later entered in documentation that is submitted,  
37 for example in any subsequent notifications of a substantial change or in connection with End  
38 of Trial reporting.  
39  
40

## 41 14. Collection, handling and archiving data

42 Subjects who participate in the study are coded with a specific study identification number. All  
43 subjects are registered in a subject identification list (subject enrolment and identification list)  
44 that connects the subject's name and personal identity number with a study identification  
45 number.  
46  
47

48 All data will be registered, managed, and stored in a manner that enables correct reporting,  
49 interpretation, and verification. The complete Trial Master File, as well as source documents,  
50 will be archived for at least 10 years after the study is completed. Source data in the medical  
51 records system is stored and archived in accordance with the respective hospital regulations.  
52  
53

### 54 14.1 Case Report Form

55 An electronic Case Report Form (eCRF) is used for data collection. The investigator must  
56 ensure that data is registered and any corrections in the eCRF are made as stated in the study  
57  
58  
59  
60

Study Code: COVID-19-HBO  
 Version No: v.4  
 Date: 2021-02-27  
 EudraCT No: 2020-001349-37

protocol and in accordance with the instructions. The investigator must ensure that the registered data is correct, complete, and that reporting takes place according to the timelines that have been predefined and agreed. The investigator signs the completed CRF. A copy of the completed CRF will be archived at the study site.

If an examination/test is not performed and data does not exist, ND (Not done) or NK (Not known) is marked. If the question is irrelevant NA (Not applicable) is written. Corrections in paper work sheets are done by striking out the incorrect information and adding the correct information next to the incorrect information, signing, and dating the correction.

## 15. Notification of study completion, reporting, and publication

The Swedish MPA, EPM, local IRBs, FDA and other national competent authorities and ethics committees shall be informed of the study's completion at latest 90 days after study end, through submission of a "Declaration of End of Trial Notification" form.

Within one year after the study is completed, the results shall be analyzed, a clinical study report with individual data shall be prepared, and the study results shall also be reported in the EudraCT database. The sponsor is responsible for the preparation of the clinical study report. The statistical analyses will be performed and the results will be presented to the Investigator(s). Based on these data, the Sponsor, in cooperation with the Investigator(s), will prepare a clinical study report. The report will be submitted to the competent authorities and may form the basis for a manuscript intended for publication in a medical/scientific journal. All personnel who have contributed significantly with the planning and performance of the study may be included in the list of authors.

## 16. References

- ARABI, Y. M., MURTHY, S. & WEBB, S. 2020. COVID-19: a novel coronavirus and a novel challenge for critical care. *Intensive Care Med*.
- BENSON, R. M., MINTER, L. M., OSBORNE, B. A. & GRANOWITZ, E. V. 2003. Hyperbaric oxygen inhibits stimulus-induced proinflammatory cytokine synthesis by human blood-derived monocyte-macrophages. *Clin Exp Immunol*, 134, 57-62.
- BRUNE, B., DEHNE, N., GROSSMANN, N., JUNG, M., NAMGALADZE, D., SCHMID, T., VON KNETHEN, A. & WEIGERT, A. 2013. Redox control of inflammation in macrophages. *Antioxid Redox Signal*, 19, 595-637.
- BURAS, J. A., HOLT, D., ORLOW, D., BELIKOFF, B., PAVLIDES, S. & REENSTRA, W. R. 2006. Hyperbaric oxygen protects from sepsis mortality via an interleukin-10-dependent mechanism. *Crit Care Med*, 34, 2624-9.
- CAO, B., WANG, Y., WEN, D., LIU, W., WANG, J., FAN, G., RUAN, L., SONG, B., CAI, Y., WEI, M., LI, X., XIA, J., CHEN, N., XIANG, J., YU, T., BAI, T., XIE, X., ZHANG, L., LI, C., YUAN, Y., CHEN, H., LI, H., HUANG, H., TU, S., GONG, F., LIU, Y., WEI, Y., DONG, C., ZHOU, F., GU, X., XU, J., LIU, Z., ZHANG, Y., LI, H., SHANG, L., WANG, K., LI, K., ZHOU, X., DONG, X., QU, Z., LU, S., HU, X., RUAN, S., LUO, S., WU, J.,

47 (50)

Study Code: COVID-19-HBO  
 Version No: v.4  
 Date: 2021-02-27  
 EudraCT No: 2020-001349-37

- PENG, L., CHENG, F., PAN, L., ZOU, J., JIA, C., WANG, J., LIU, X., WANG, S., WU, X., GE, Q., HE, J., ZHAN, H., QIU, F., GUO, L., HUANG, C., JAKI, T., HAYDEN, F. G., HORBY, P. W., ZHANG, D. & WANG, C. 2020. A Trial of Lopinavir-Ritonavir in Adults Hospitalized with Severe Covid-19. *N Engl J Med*.
- CHEN, N., ZHOU, M., DONG, X., QU, J., GONG, F., HAN, Y., QIU, Y., WANG, J., LIU, Y., WEI, Y., XIA, J., YU, T., ZHANG, X. & ZHANG, L. 2020. Epidemiological and clinical characteristics of 99 cases of 2019 novel coronavirus pneumonia in Wuhan, China: a descriptive study. *Lancet*, 395, 507-513.
- CHEN, R. T., Y; ZHONG, X; LIANG, Y; LI, B; TAO, X; LIAO, B; 2020. Efficacy analysis of hyperbaric oxygen therapy in the treatment of severe coronavirus disease 2019 patients. *Acad. J. Second Mil. Med. Univ.*, 6, 604-611.
- DONG, H., LI, J., LV, Y., ZHOU, Y., WANG, G., HU, S., HE, X., YANG, P., ZHOU, Z., XIANG, X. & WANG, C. Y. 2013. Comparative analysis of the alveolar macrophage proteome in ALI/ARDS patients between the exudative phase and recovery phase. *BMC Immunol*, 14, 25.
- GENG, M., ZHOU, L., LIU, X. & LI, P. 2015. Hyperbaric oxygen treatment reduced the lung injury of type II decompression sickness. *Int J Clin Exp Pathol*, 8, 1797-803.
- GILL, A. L. & BELL, C. N. 2004. Hyperbaric oxygen: its uses, mechanisms of action and outcomes. *QJM*, 97, 385-95.
- GORENSTEIN, S. A., CASTELLANO, M. L., SLONE, E. S., GILLETTE, B., LIU, H., ALSAMARRAIE, C., JACOBSON, A. M., WALL, S. P., ADHIKARI, S., SWARTZ, J. L., MCMULLEN, J. J. S., OSORIO, M., KOZIATEK, C. A. & LEE, D. C. 2020. Hyperbaric oxygen therapy for COVID-19 patients with respiratory distress: treated cases versus propensity-matched controls. *Undersea Hyperb Med*, 47, 405-413.
- GRASSELLI, G., PESENTI, A. & CECCONI, M. 2020. Critical Care Utilization for the COVID-19 Outbreak in Lombardy, Italy: Early Experience and Forecast During an Emergency Response. *JAMA*.
- GUO, Y. R., CAO, Q. D., HONG, Z. S., TAN, Y. Y., CHEN, S. D., JIN, H. J., TAN, K. S., WANG, D. Y. & YAN, Y. 2020. The origin, transmission and clinical therapies on coronavirus disease 2019 (COVID-19) outbreak - an update on the status. *Mil Med Res*, 7, 11.
- HAN, C. H., ZHANG, P. X., XU, W. G., LI, R. P., XU, J. J. & LIU, W. W. 2017. Polarization of macrophages in the blood after decompression in mice. *Med Gas Res*, 7, 236-240.
- KARSHOVSKA, E., WEI, Y., SUBRAMANIAN, P., MOHIBULLAH, R., GEISLER, C., BAATSCH, I., POPAL, A., CORBALAN CAMPOS, J., EXNER, N. & SCHOBBER, A. 2020. HIF-1alpha (Hypoxia-Inducible Factor-1alpha) Promotes Macrophage Necroptosis by Regulating miR-210 and miR-383. *Arterioscler Thromb Vasc Biol*, 40, 583-596.
- KJELLBERG, A., DE MAIO, A. & LINDHOLM, P. 2020. Can hyperbaric oxygen safely serve as an anti-inflammatory treatment for COVID-19? *Medical Hypotheses*, 144.
- LICHTENSTEIN, D. 2014. Lung ultrasound in the critically ill. *Curr Opin Crit Care*, 20, 315-22.
- MACA, J., JOR, O., HOLUB, M., SKLIENKA, P., BURSA, F., BURDA, M., JANOUT, V. & SEVCIK, P. 2017. Past and Present ARDS Mortality Rates: A Systematic Review. *Respir Care*, 62, 113-122.
- MOON, R. E. (ed.) 2019. *Hyperbaric Oxygen Therapy Indications: Undersea and Hyperbaric Medical Society*.
- OYAZU, T., ENOMOTO, M., YAMAMOTO, N., TSUJI, K., HORIE, M., MUNETA, T., SEKIYA, I., OKAWA, A. & YAGISHITA, K. 2018. Hyperbaric oxygen reduces inflammation, oxygenates injured muscle, and regenerates skeletal muscle via macrophage and satellite cell activation. *Sci Rep*, 8, 1288.

1 Study Code: COVID-19-HBO  
2 Version No: v.4  
3 Date: 2021-02-27  
4 EudraCT No: 2020-001349-37  
5

- 6 PAGANINI, M., BOSCO, G., PEROZZO, F. A. G., KOHLSCHEEN, E., SONDA, R.,  
7 BASSETTO, F., GARETTO, G., CAMPORESI, E. M. & THOM, S. R. 2020. The Role  
8 of Hyperbaric Oxygen Treatment for COVID-19: A Review. *Adv Exp Med Biol*.  
9 PAN, F., YE, T., SUN, P., GUI, S., LIANG, B., LI, L., ZHENG, D., WANG, J., HESKETH, R.  
10 L., YANG, L. & ZHENG, C. 2020. Time Course of Lung Changes On Chest CT  
11 During Recovery From 2019 Novel Coronavirus (COVID-19) Pneumonia. *Radiology*,  
12 200370.  
13 SULKOWSKI, S., SULKOWSKA, M., GIEDROJC, J., TERLIKOWSKI, S., DZIECIOL, J. &  
14 FAMULSKI, W. 1997. Evaluation of the effect of macrophage system activation on  
15 the intensity degree of early destructive changes in acute enzymatic lung injury. *Rocz*  
16 *Akad Med Bialymst*, 42 Suppl 1, 412-21.  
17 THIBODEAUX, K., SPEYRER, M., RAZA, A., YAAKOV, R. & SERENA, T. E. 2020.  
18 Hyperbaric oxygen therapy in preventing mechanical ventilation in COVID-19  
19 patients: a retrospective case series. *J Wound Care*, 29, S4-S8.  
20 THOM, S. R. 2011. Hyperbaric oxygen: its mechanisms and efficacy. *Plast Reconstr Surg*,  
21 127 Suppl 1, 131S-141S.  
22 WENG, Y. S., TSENG, H. Y., CHEN, Y. A., SHEN, P. C., AL HAQ, A. T., CHEN, L. M.,  
23 TUNG, Y. C. & HSU, H. L. 2019. MCT-1/miR-34a/IL-6/IL-6R signaling axis promotes  
24 EMT progression, cancer stemness and M2 macrophage polarization in triple-  
25 negative breast cancer. *Mol Cancer*, 18, 42.  
26 YANG, J., ZHENG, Y., GOU, X., PU, K., CHEN, Z., GUO, Q., JI, R., WANG, H., WANG, Y. &  
27 ZHOU, Y. 2020a. Prevalence of comorbidities in the novel Wuhan coronavirus  
28 (COVID-19) infection: a systematic review and meta-analysis. *Int J Infect Dis*.  
29 YANG, Y., PENG, F., WANG, R., GUAN, K., JIANG, T., XU, G., SUN, J. & CHANG, C.  
30 2020b. The deadly coronaviruses: The 2003 SARS pandemic and the 2020 novel  
31 coronavirus epidemic in China. *J Autoimmun*, 102434.  
32 ZHANG, H., ZHOU, P., WEI, Y., YUE, H., WANG, Y., HU, M., ZHANG, S., CAO, T., YANG,  
33 C., LI, M., GUO, G., CHEN, X., CHEN, Y., LEI, M., LIU, H., ZHAO, J., PENG, P.,  
34 WANG, C. Y. & DU, R. 2020. Histopathologic Changes and SARS-CoV-2  
35 Immunostaining in the Lung of a Patient With COVID-19. *Ann Intern Med*.  
36 ZHONG, X. T., X; TANG, Y; CHEN, R; 2020. The effect of hyperbaric oxygen therapy on  
37 hypoxia in patients with severe new coronavirus pneumonia: the first report. *Chinese*  
38 *Journal of Nautical Medicine and Hyperbaric Medicine*.  
39 ZHOU, F., YU, T., DU, R., FAN, G., LIU, Y., LIU, Z., XIANG, J., WANG, Y., SONG, B., GU,  
40 X., GUAN, L., WEI, Y., LI, H., WU, X., XU, J., TU, S., ZHANG, Y., CHEN, H. & CAO,  
41 B. 2020. Clinical course and risk factors for mortality of adult inpatients with COVID-  
42 19 in Wuhan, China: a retrospective cohort study. *Lancet*, 395, 1054-1062.  
43  
44  
45  
46  
47  
48  
49  
50  
51  
52  
53  
54  
55  
56  
57  
58  
59  
60

Study Code: COVID-19-HBO  
 Version No: v.4  
 Date: 2021-02-27  
 EudraCT No: 2020-001349-37

## 17. Amendments and Administrative changes

The following amendments and Administrative changes have been made to this protocol since day of preparation:

| Amendment                                                                                                                                                                                                                                                                                                                                                                                                                                                                                                                                                                                                                              | Section/Page                                                                                                                                                                       | Date       | Type/comment                                                                                               |
|----------------------------------------------------------------------------------------------------------------------------------------------------------------------------------------------------------------------------------------------------------------------------------------------------------------------------------------------------------------------------------------------------------------------------------------------------------------------------------------------------------------------------------------------------------------------------------------------------------------------------------------|------------------------------------------------------------------------------------------------------------------------------------------------------------------------------------|------------|------------------------------------------------------------------------------------------------------------|
| Version 1                                                                                                                                                                                                                                                                                                                                                                                                                                                                                                                                                                                                                              |                                                                                                                                                                                    | 2020-04-23 | Approved by IEC/IRB Sweden                                                                                 |
| Version 2<br>Spelling/layout errors, change of biobank, German sites added, change in screening procedure                                                                                                                                                                                                                                                                                                                                                                                                                                                                                                                              | 2.2, 5.3.3, 8.2, 9.1.1, 14.1.9, 14                                                                                                                                                 | 2020-05-17 | Non-substantial revision Sweden, Changed before inclusion of first subject.<br>IEC/IRB Germany submission. |
| Version 3<br>ClinicalTrials.gov identification<br>New sites Karolinska and Sahlgrenska<br>Change of NCI in Germany<br>New site Brasov<br>Added names of DSMB<br>Change of biobank<br>Revision history added<br>Updated background with new publications, updated references<br>Change of minor spelling/grammatical and layout errors and minor clarifications/explanations in procedures                                                                                                                                                                                                                                              | Front page<br>Contact info/7-9<br><br>5.3.3<br>17<br>2.2, 16<br><br>Full protocol, update list of content                                                                          | 2020-11-16 | Substantial revision/<br>IEC amendment Sweden, Germany<br>First submission IEC/IRB Romania                 |
| Version 4<br>Removed sites UCSD and Brasov, change of NCI Germany<br>Change in risk evaluation<br>Change in procedures:<br>-NEWS not mandatory x3<br>-ABG/CBG if warranted<br>-Increased limits for NEWS and AGB/CBG<br>Update responsible of Biobank<br>Clarification of withdrawal criteria: negative SARS-CoV-2<br>Recommended dose profile<br>Change of timeframe for AE reporting<br>Update of safety analysis to comply with DSMB instruction 10.6<br>Clarification of source data<br>Clarification of ICF process<br>Change of minor spelling/grammatical and layout errors and minor clarifications/explanations in procedures | Contact info/7-8<br><br>3.5<br>5.2.1, 5.2.2<br><br>5.3<br>6.4<br><br>7.2<br>8.3.1<br><br>9.2.6.2<br><br>10.3<br>11.3<br>Full protocol, update list of content and revision history | 2021-02-27 | Substantial revision/<br>IEC amendment Sweden<br>IEC/IRB Germany re-submission.                            |
|                                                                                                                                                                                                                                                                                                                                                                                                                                                                                                                                                                                                                                        |                                                                                                                                                                                    |            |                                                                                                            |
|                                                                                                                                                                                                                                                                                                                                                                                                                                                                                                                                                                                                                                        |                                                                                                                                                                                    |            |                                                                                                            |
|                                                                                                                                                                                                                                                                                                                                                                                                                                                                                                                                                                                                                                        |                                                                                                                                                                                    |            |                                                                                                            |



# Reporting checklist for protocol of a clinical trial.

Based on the SPIRIT guidelines.

## Instructions to authors

Complete this checklist by entering the page numbers from your manuscript where readers will find each of the items listed below.

Your article may not currently address all the items on the checklist. Please modify your text to include the missing information. If you are certain that an item does not apply, please write "n/a" and provide a short explanation.

Upload your completed checklist as an extra file when you submit to a journal.

In your methods section, say that you used the SPIRIT reporting guidelines, and cite them as:

Chan A-W, Tetzlaff JM, Gøtzsche PC, Altman DG, Mann H, Berlin J, Dickersin K, Hróbjartsson A, Schulz KF, Parulekar WR, Krleža-Jerić K, Laupacis A, Moher D. SPIRIT 2013 Explanation and Elaboration: Guidance for protocols of clinical trials. *BMJ*. 2013;346:e7586

|                                   |                     | Reporting Item                                                                                               | Page Number     |
|-----------------------------------|---------------------|--------------------------------------------------------------------------------------------------------------|-----------------|
| <b>Administrative information</b> |                     |                                                                                                              |                 |
| Title                             | <a href="#">#1</a>  | Descriptive title identifying the study design, population, interventions, and, if applicable, trial acronym | 1               |
| Trial registration                | <a href="#">#2a</a> | Trial identifier and registry name. If not yet registered, name of intended registry                         | 1               |
| Trial registration: data set      | <a href="#">#2b</a> | All items from the World Health Organization Trial Registration Data Set                                     | 11-13           |
| Protocol version                  | <a href="#">#3</a>  | Date and version identifier                                                                                  | 1               |
| Funding                           | <a href="#">#4</a>  | Sources and types of financial, material, and other support                                                  | N/A, In current |

|    |                      |                     |                                                          |
|----|----------------------|---------------------|----------------------------------------------------------|
| 1  |                      |                     | publicat                                                 |
| 2  |                      |                     | ion                                                      |
| 3  |                      |                     |                                                          |
| 4  | Roles and            | <a href="#">#5a</a> | Names, affiliations, and roles of protocol               |
| 5  | responsibilities:    |                     | contributors                                             |
| 6  | contributorship      |                     | 7-8                                                      |
| 7  |                      |                     |                                                          |
| 8  |                      |                     |                                                          |
| 9  | Roles and            | <a href="#">#5b</a> | Name and contact information for the trial sponsor       |
| 10 | responsibilities:    |                     | 7                                                        |
| 11 | sponsor contact      |                     |                                                          |
| 12 | information          |                     |                                                          |
| 13 |                      |                     |                                                          |
| 14 | Roles and            | <a href="#">#5c</a> | Role of study sponsor and funders, if any, in study      |
| 15 | responsibilities:    |                     | design; collection, management, analysis, and            |
| 16 | sponsor and funder   |                     | interpretation of data; writing of the report; and the   |
| 17 |                      |                     | decision to submit the report for publication,           |
| 18 |                      |                     | including whether they will have ultimate authority      |
| 19 |                      |                     | over any of these activities                             |
| 20 |                      |                     | N/A, In                                                  |
| 21 |                      |                     | current                                                  |
| 22 |                      |                     | publicat                                                 |
| 23 |                      |                     | ion                                                      |
| 24 |                      |                     |                                                          |
| 25 | Roles and            | <a href="#">#5d</a> | Composition, roles, and responsibilities of the          |
| 26 | responsibilities:    |                     | coordinating centre, steering committee, endpoint        |
| 27 | committees           |                     | adjudication committee, data management team,            |
| 28 |                      |                     | and other individuals or groups overseeing the trial,    |
| 29 |                      |                     | if applicable (see Item 21a for data monitoring          |
| 30 |                      |                     | committee)                                               |
| 31 |                      |                     | 7-8                                                      |
| 32 |                      |                     |                                                          |
| 33 |                      |                     |                                                          |
| 34 |                      |                     |                                                          |
| 35 |                      |                     |                                                          |
| 36 |                      |                     |                                                          |
| 37 | <b>Introduction</b>  |                     |                                                          |
| 38 |                      |                     |                                                          |
| 39 | Background and       | <a href="#">#6a</a> | Description of research question and justification       |
| 40 | rationale            |                     | for undertaking the trial, including summary of          |
| 41 |                      |                     | relevant studies (published and unpublished)             |
| 42 |                      |                     | examining benefits and harms for each intervention       |
| 43 |                      |                     |                                                          |
| 44 |                      |                     |                                                          |
| 45 |                      |                     |                                                          |
| 46 | Background and       | <a href="#">#6b</a> | Explanation for choice of comparators                    |
| 47 | rationale: choice of |                     | 22                                                       |
| 48 | comparators          |                     |                                                          |
| 49 |                      |                     |                                                          |
| 50 |                      |                     |                                                          |
| 51 |                      |                     |                                                          |
| 52 | Objectives           | <a href="#">#7</a>  | Specific objectives or hypotheses                        |
| 53 |                      |                     | 19                                                       |
| 54 |                      |                     |                                                          |
| 55 | Trial design         | <a href="#">#8</a>  | Description of trial design including type of trial (eg, |
| 56 |                      |                     | parallel group, crossover, factorial, single group),     |
| 57 |                      |                     | 21                                                       |
| 58 |                      |                     |                                                          |
| 59 |                      |                     |                                                          |
| 60 |                      |                     |                                                          |

allocation ratio, and framework (eg, superiority, equivalence, non-inferiority, exploratory)

**Methods:  
Participants,  
interventions, and  
outcomes**

|                                    |                                          |                                                                                                                                                                                                                                                                                                                                                                                |       |
|------------------------------------|------------------------------------------|--------------------------------------------------------------------------------------------------------------------------------------------------------------------------------------------------------------------------------------------------------------------------------------------------------------------------------------------------------------------------------|-------|
| Study setting                      | <a href="#">#9</a>                       | Description of study settings (eg, community clinic, academic hospital) and list of countries where data will be collected. Reference to where list of study sites can be obtained                                                                                                                                                                                             | 7-8   |
| Eligibility criteria               | <a href="#">#10</a>                      | Inclusion and exclusion criteria for participants. If applicable, eligibility criteria for study centres and individuals who will perform the interventions (eg, surgeons, psychotherapists)                                                                                                                                                                                   | 31-32 |
| Interventions:<br>description      | <a href="#">#11</a><br><a href="#">a</a> | Interventions for each group with sufficient detail to allow replication, including how and when they will be administered                                                                                                                                                                                                                                                     | 33-34 |
| Interventions:<br>modifications    | <a href="#">#11</a><br><a href="#">b</a> | Criteria for discontinuing or modifying allocated interventions for a given trial participant (eg, drug dose change in response to harms, participant request, or improving / worsening disease)                                                                                                                                                                               | 34-39 |
| Interventions:<br>adherence        | <a href="#">#11c</a>                     | Strategies to improve adherence to intervention protocols, and any procedures for monitoring adherence (eg, drug tablet return; laboratory tests)                                                                                                                                                                                                                              | 34    |
| Interventions:<br>concomitant care | <a href="#">#11</a><br><a href="#">d</a> | Relevant concomitant care and interventions that are permitted or prohibited during the trial                                                                                                                                                                                                                                                                                  | 35    |
| Outcomes                           | <a href="#">#12</a>                      | Primary, secondary, and other outcomes, including the specific measurement variable (eg, systolic blood pressure), analysis metric (eg, change from baseline, final value, time to event), method of aggregation (eg, median, proportion), and time point for each outcome. Explanation of the clinical relevance of chosen efficacy and harm outcomes is strongly recommended | 19-21 |

|    |                           |                      |                                                                                                                                                                                                                                                                                                                                                                               |                                 |
|----|---------------------------|----------------------|-------------------------------------------------------------------------------------------------------------------------------------------------------------------------------------------------------------------------------------------------------------------------------------------------------------------------------------------------------------------------------|---------------------------------|
| 1  | Participant timeline      | <a href="#">#13</a>  | Time schedule of enrolment, interventions<br>(including any run-ins and washouts),<br>assessments, and visits for participants. A<br>schematic diagram is highly recommended (see<br>Figure)                                                                                                                                                                                  | 22                              |
| 2  |                           |                      |                                                                                                                                                                                                                                                                                                                                                                               |                                 |
| 3  |                           |                      |                                                                                                                                                                                                                                                                                                                                                                               |                                 |
| 4  |                           |                      |                                                                                                                                                                                                                                                                                                                                                                               |                                 |
| 5  |                           |                      |                                                                                                                                                                                                                                                                                                                                                                               |                                 |
| 6  |                           |                      |                                                                                                                                                                                                                                                                                                                                                                               |                                 |
| 7  |                           |                      |                                                                                                                                                                                                                                                                                                                                                                               |                                 |
| 8  |                           |                      |                                                                                                                                                                                                                                                                                                                                                                               |                                 |
| 9  |                           |                      |                                                                                                                                                                                                                                                                                                                                                                               |                                 |
| 10 | Sample size               | <a href="#">#14</a>  | Estimated number of participants needed to<br>achieve study objectives and how it was<br>determined, including clinical and statistical<br>assumptions supporting any sample size<br>calculations                                                                                                                                                                             | 40                              |
| 11 |                           |                      |                                                                                                                                                                                                                                                                                                                                                                               |                                 |
| 12 |                           |                      |                                                                                                                                                                                                                                                                                                                                                                               |                                 |
| 13 |                           |                      |                                                                                                                                                                                                                                                                                                                                                                               |                                 |
| 14 |                           |                      |                                                                                                                                                                                                                                                                                                                                                                               |                                 |
| 15 |                           |                      |                                                                                                                                                                                                                                                                                                                                                                               |                                 |
| 16 |                           |                      |                                                                                                                                                                                                                                                                                                                                                                               |                                 |
| 17 |                           |                      |                                                                                                                                                                                                                                                                                                                                                                               |                                 |
| 18 | Recruitment               | <a href="#">#15</a>  | Strategies for achieving adequate participant<br>enrolment to reach target sample size                                                                                                                                                                                                                                                                                        | N/A,<br>ongoing<br>pandem<br>ic |
| 19 |                           |                      |                                                                                                                                                                                                                                                                                                                                                                               |                                 |
| 20 |                           |                      |                                                                                                                                                                                                                                                                                                                                                                               |                                 |
| 21 |                           |                      |                                                                                                                                                                                                                                                                                                                                                                               |                                 |
| 22 |                           |                      |                                                                                                                                                                                                                                                                                                                                                                               |                                 |
| 23 |                           |                      |                                                                                                                                                                                                                                                                                                                                                                               |                                 |
| 24 |                           |                      |                                                                                                                                                                                                                                                                                                                                                                               |                                 |
| 25 | <b>Methods:</b>           |                      |                                                                                                                                                                                                                                                                                                                                                                               |                                 |
| 26 | <b>Assignment of</b>      |                      |                                                                                                                                                                                                                                                                                                                                                                               |                                 |
| 27 | <b>interventions (for</b> |                      |                                                                                                                                                                                                                                                                                                                                                                               |                                 |
| 28 | <b>controlled trials)</b> |                      |                                                                                                                                                                                                                                                                                                                                                                               |                                 |
| 29 |                           |                      |                                                                                                                                                                                                                                                                                                                                                                               |                                 |
| 30 |                           |                      |                                                                                                                                                                                                                                                                                                                                                                               |                                 |
| 31 |                           |                      |                                                                                                                                                                                                                                                                                                                                                                               |                                 |
| 32 | Allocation: sequence      | <a href="#">#16</a>  | Method of generating the allocation sequence (eg,<br>computer-generated random numbers), and list of<br>any factors for stratification. To reduce<br>predictability of a random sequence, details of any<br>planned restriction (eg, blocking) should be<br>provided in a separate document that is<br>unavailable to those who enrol participants or<br>assign interventions | 34                              |
| 33 | generation                | <a href="#">a</a>    |                                                                                                                                                                                                                                                                                                                                                                               |                                 |
| 34 |                           |                      |                                                                                                                                                                                                                                                                                                                                                                               |                                 |
| 35 |                           |                      |                                                                                                                                                                                                                                                                                                                                                                               |                                 |
| 36 |                           |                      |                                                                                                                                                                                                                                                                                                                                                                               |                                 |
| 37 |                           |                      |                                                                                                                                                                                                                                                                                                                                                                               |                                 |
| 38 |                           |                      |                                                                                                                                                                                                                                                                                                                                                                               |                                 |
| 39 |                           |                      |                                                                                                                                                                                                                                                                                                                                                                               |                                 |
| 40 |                           |                      |                                                                                                                                                                                                                                                                                                                                                                               |                                 |
| 41 |                           |                      |                                                                                                                                                                                                                                                                                                                                                                               |                                 |
| 42 |                           |                      |                                                                                                                                                                                                                                                                                                                                                                               |                                 |
| 43 |                           |                      |                                                                                                                                                                                                                                                                                                                                                                               |                                 |
| 44 |                           |                      |                                                                                                                                                                                                                                                                                                                                                                               |                                 |
| 45 |                           |                      |                                                                                                                                                                                                                                                                                                                                                                               |                                 |
| 46 | Allocation                | <a href="#">#16</a>  | Mechanism of implementing the allocation<br>sequence (eg, central telephone; sequentially<br>numbered, opaque, sealed envelopes), describing<br>any steps to conceal the sequence until<br>interventions are assigned                                                                                                                                                         | 34                              |
| 47 | concealment               | <a href="#">b</a>    |                                                                                                                                                                                                                                                                                                                                                                               |                                 |
| 48 | mechanism                 |                      |                                                                                                                                                                                                                                                                                                                                                                               |                                 |
| 49 |                           |                      |                                                                                                                                                                                                                                                                                                                                                                               |                                 |
| 50 |                           |                      |                                                                                                                                                                                                                                                                                                                                                                               |                                 |
| 51 |                           |                      |                                                                                                                                                                                                                                                                                                                                                                               |                                 |
| 52 |                           |                      |                                                                                                                                                                                                                                                                                                                                                                               |                                 |
| 53 |                           |                      |                                                                                                                                                                                                                                                                                                                                                                               |                                 |
| 54 | Allocation:               | <a href="#">#16c</a> | Who will generate the allocation sequence, who<br>will enrol participants, and who will assign<br>participants to interventions                                                                                                                                                                                                                                               | 34                              |
| 55 | implementation            |                      |                                                                                                                                                                                                                                                                                                                                                                               |                                 |
| 56 |                           |                      |                                                                                                                                                                                                                                                                                                                                                                               |                                 |
| 57 |                           |                      |                                                                                                                                                                                                                                                                                                                                                                               |                                 |
| 58 |                           |                      |                                                                                                                                                                                                                                                                                                                                                                               |                                 |
| 59 |                           |                      |                                                                                                                                                                                                                                                                                                                                                                               |                                 |
| 60 |                           |                      |                                                                                                                                                                                                                                                                                                                                                                               |                                 |

|    |                        |                     |                                                        |       |
|----|------------------------|---------------------|--------------------------------------------------------|-------|
| 1  | Blinding (masking)     | <a href="#">#17</a> | Who will be blinded after assignment to                | N/A   |
| 2  |                        | <a href="#">a</a>   | interventions (eg, trial participants, care providers, |       |
| 3  |                        |                     | outcome assessors, data analysts), and how             |       |
| 4  |                        |                     |                                                        |       |
| 5  |                        |                     |                                                        |       |
| 6  | Blinding (masking):    | <a href="#">#17</a> | If blinded, circumstances under which unblinding is    | N/A   |
| 7  | emergency              | <a href="#">b</a>   | permissible, and procedure for revealing a             |       |
| 8  | unblinding             |                     | participant's allocated intervention during the trial  |       |
| 9  |                        |                     |                                                        |       |
| 10 |                        |                     |                                                        |       |
| 11 |                        |                     |                                                        |       |
| 12 | <b>Methods: Data</b>   |                     |                                                        |       |
| 13 | <b>collection,</b>     |                     |                                                        |       |
| 14 | <b>management, and</b> |                     |                                                        |       |
| 15 | <b>analysis</b>        |                     |                                                        |       |
| 16 |                        |                     |                                                        |       |
| 17 |                        |                     |                                                        |       |
| 18 |                        |                     |                                                        |       |
| 19 | Data collection plan   | <a href="#">#18</a> | Plans for assessment and collection of outcome,        | 42-45 |
| 20 |                        | <a href="#">a</a>   | baseline, and other trial data, including any related  |       |
| 21 |                        |                     | processes to promote data quality (eg, duplicate       |       |
| 22 |                        |                     | measurements, training of assessors) and a             |       |
| 23 |                        |                     | description of study instruments (eg,                  |       |
| 24 |                        |                     | questionnaires, laboratory tests) along with their     |       |
| 25 |                        |                     | reliability and validity, if known. Reference to where |       |
| 26 |                        |                     | data collection forms can be found, if not in the      |       |
| 27 |                        |                     | protocol                                               |       |
| 28 |                        |                     |                                                        |       |
| 29 |                        |                     |                                                        |       |
| 30 |                        |                     |                                                        |       |
| 31 |                        |                     |                                                        |       |
| 32 |                        |                     |                                                        |       |
| 33 |                        |                     |                                                        |       |
| 34 | Data collection plan:  | <a href="#">#18</a> | Plans to promote participant retention and             | 32-34 |
| 35 | retention              | <a href="#">b</a>   | complete follow-up, including list of any outcome      |       |
| 36 |                        |                     | data to be collected for participants who              |       |
| 37 |                        |                     | discontinue or deviate from intervention protocols     |       |
| 38 |                        |                     |                                                        |       |
| 39 |                        |                     |                                                        |       |
| 40 |                        |                     |                                                        |       |
| 41 | Data management        | <a href="#">#19</a> | Plans for data entry, coding, security, and storage,   | 43    |
| 42 |                        |                     | including any related processes to promote data        |       |
| 43 |                        |                     | quality (eg, double data entry; range checks for       |       |
| 44 |                        |                     | data values). Reference to where details of data       |       |
| 45 |                        |                     | management procedures can be found, if not in the      |       |
| 46 |                        |                     | protocol                                               |       |
| 47 |                        |                     |                                                        |       |
| 48 |                        |                     |                                                        |       |
| 49 |                        |                     |                                                        |       |
| 50 |                        |                     |                                                        |       |
| 51 | Statistics: outcomes   | <a href="#">#20</a> | Statistical methods for analysing primary and          | 40-42 |
| 52 |                        | <a href="#">a</a>   | secondary outcomes. Reference to where other           |       |
| 53 |                        |                     | details of the statistical analysis plan can be found, |       |
| 54 |                        |                     | if not in the protocol                                 |       |
| 55 |                        |                     |                                                        |       |
| 56 |                        |                     |                                                        |       |
| 57 |                        |                     |                                                        |       |
| 58 |                        |                     |                                                        |       |
| 59 |                        |                     |                                                        |       |
| 60 |                        |                     |                                                        |       |

|    |                        |                      |                                                        |        |
|----|------------------------|----------------------|--------------------------------------------------------|--------|
| 1  | Statistics: additional | <a href="#">#20</a>  | Methods for any additional analyses (eg, subgroup      | 39     |
| 2  | analyses               | <a href="#">b</a>    | and adjusted analyses)                                 |        |
| 3  |                        |                      |                                                        |        |
| 4  |                        |                      |                                                        |        |
| 5  | Statistics: analysis   | <a href="#">#20c</a> | Definition of analysis population relating to protocol | 42     |
| 6  | population and         |                      | non-adherence (eg, as randomised analysis), and        |        |
| 7  | missing data           |                      | any statistical methods to handle missing data (eg,    |        |
| 8  |                        |                      | multiple imputation)                                   |        |
| 9  |                        |                      |                                                        |        |
| 10 |                        |                      |                                                        |        |
| 11 |                        |                      |                                                        |        |
| 12 | <b>Methods:</b>        |                      |                                                        |        |
| 13 | <b>Monitoring</b>      |                      |                                                        |        |
| 14 |                        |                      |                                                        |        |
| 15 |                        |                      |                                                        |        |
| 16 | Data monitoring:       | <a href="#">#21</a>  | Composition of data monitoring committee (DMC);        | 8, 44- |
| 17 | formal committee       | <a href="#">a</a>    | summary of its role and reporting structure;           | 45     |
| 18 |                        |                      | statement of whether it is independent from the        |        |
| 19 |                        |                      | sponsor and competing interests; and reference to      |        |
| 20 |                        |                      | where further details about its charter can be         |        |
| 21 |                        |                      | found, if not in the protocol. Alternatively, an       |        |
| 22 |                        |                      | explanation of why a DMC is not needed                 |        |
| 23 |                        |                      |                                                        |        |
| 24 |                        |                      |                                                        |        |
| 25 |                        |                      |                                                        |        |
| 26 |                        |                      |                                                        |        |
| 27 |                        |                      |                                                        |        |
| 28 | Data monitoring:       | <a href="#">#21</a>  | Description of any interim analyses and stopping       | 42-44  |
| 29 | interim analysis       | <a href="#">b</a>    | guidelines, including who will have access to these    |        |
| 30 |                        |                      | interim results and make the final decision to         |        |
| 31 |                        |                      | terminate the trial                                    |        |
| 32 |                        |                      |                                                        |        |
| 33 |                        |                      |                                                        |        |
| 34 |                        |                      |                                                        |        |
| 35 | Harms                  | <a href="#">#22</a>  | Plans for collecting, assessing, reporting, and        | 35-39  |
| 36 |                        |                      | managing solicited and spontaneously reported          |        |
| 37 |                        |                      | adverse events and other unintended effects of         |        |
| 38 |                        |                      | trial interventions or trial conduct                   |        |
| 39 |                        |                      |                                                        |        |
| 40 |                        |                      |                                                        |        |
| 41 |                        |                      |                                                        |        |
| 42 | Auditing               | <a href="#">#23</a>  | Frequency and procedures for auditing trial            | 42-45  |
| 43 |                        |                      | conduct, if any, and whether the process will be       |        |
| 44 |                        |                      | independent from investigators and the sponsor         |        |
| 45 |                        |                      |                                                        |        |
| 46 |                        |                      |                                                        |        |
| 47 |                        |                      |                                                        |        |
| 48 | <b>Ethics and</b>      |                      |                                                        |        |
| 49 | <b>dissemination</b>   |                      |                                                        |        |
| 50 |                        |                      |                                                        |        |
| 51 | Research ethics        | <a href="#">#24</a>  | Plans for seeking research ethics committee /          | 45-46  |
| 52 | approval               |                      | institutional review board (REC / IRB) approval        |        |
| 53 |                        |                      |                                                        |        |
| 54 |                        |                      |                                                        |        |
| 55 | Protocol               | <a href="#">#25</a>  | Plans for communicating important protocol             | 45     |
| 56 | amendments             |                      | modifications (eg, changes to eligibility criteria,    |        |
| 57 |                        |                      | outcomes, analyses) to relevant parties (eg,           |        |
| 58 |                        |                      |                                                        |        |
| 59 |                        |                      |                                                        |        |
| 60 |                        |                      |                                                        |        |

|    |                       |                                                                            |          |
|----|-----------------------|----------------------------------------------------------------------------|----------|
| 1  |                       | investigators, REC / IRBs, trial participants, trial                       |          |
| 2  |                       | registries, journals, regulators)                                          |          |
| 3  |                       |                                                                            |          |
| 4  | Consent or assent     | <a href="#">#26</a> Who will obtain informed consent or assent from        | 45       |
| 5  |                       | <a href="#">a</a> potential trial participants or authorised surrogates,   |          |
| 6  |                       | and how (see Item 32)                                                      |          |
| 7  |                       |                                                                            |          |
| 8  |                       |                                                                            |          |
| 9  |                       |                                                                            |          |
| 10 | Consent or assent:    | <a href="#">#26</a> Additional consent provisions for collection and use   | 44       |
| 11 | ancillary studies     | <a href="#">b</a> of participant data and biological specimens in          |          |
| 12 |                       | ancillary studies, if applicable                                           |          |
| 13 |                       |                                                                            |          |
| 14 |                       |                                                                            |          |
| 15 | Confidentiality       | <a href="#">#27</a> How personal information about potential and           | 44, 46   |
| 16 |                       | enrolled participants will be collected, shared, and                       |          |
| 17 |                       | maintained in order to protect confidentiality                             |          |
| 18 |                       | before, during, and after the trial                                        |          |
| 19 |                       |                                                                            |          |
| 20 |                       |                                                                            |          |
| 21 |                       |                                                                            |          |
| 22 | Declaration of        | <a href="#">#28</a> Financial and other competing interests for            | N/A      |
| 23 | interests             | principal investigators for the overall trial and each                     | include  |
| 24 |                       | study site                                                                 | d in     |
| 25 |                       |                                                                            | current  |
| 26 |                       |                                                                            | publicat |
| 27 |                       |                                                                            | ion      |
| 28 |                       |                                                                            |          |
| 29 |                       |                                                                            |          |
| 30 |                       |                                                                            |          |
| 31 |                       |                                                                            |          |
| 32 | Data access           | <a href="#">#29</a> Statement of who will have access to the final trial   | 46       |
| 33 |                       | dataset, and disclosure of contractual agreements                          |          |
| 34 |                       | that limit such access for investigators                                   |          |
| 35 |                       |                                                                            |          |
| 36 |                       |                                                                            |          |
| 37 |                       |                                                                            |          |
| 38 | Ancillary and post    | <a href="#">#30</a> Provisions, if any, for ancillary and post-trial care, | 46       |
| 39 | trial care            | and for compensation to those who suffer harm                              |          |
| 40 |                       | from trial participation                                                   |          |
| 41 |                       |                                                                            |          |
| 42 |                       |                                                                            |          |
| 43 | Dissemination policy: | <a href="#">#31</a> Plans for investigators and sponsor to                 | 47       |
| 44 | trial results         | <a href="#">a</a> communicate trial results to participants,               |          |
| 45 |                       | healthcare professionals, the public, and other                            |          |
| 46 |                       | relevant groups (eg, via publication, reporting in                         |          |
| 47 |                       | results databases, or other data sharing                                   |          |
| 48 |                       | arrangements), including any publication                                   |          |
| 49 |                       | restrictions                                                               |          |
| 50 |                       |                                                                            |          |
| 51 |                       |                                                                            |          |
| 52 |                       |                                                                            |          |
| 53 |                       |                                                                            |          |
| 54 |                       |                                                                            |          |
| 55 | Dissemination policy: | <a href="#">#31</a> Authorship eligibility guidelines and any intended     | N/A      |
| 56 | authorship            | <a href="#">b</a> use of professional writers                              |          |
| 57 |                       |                                                                            |          |
| 58 |                       |                                                                            |          |
| 59 |                       |                                                                            |          |
| 60 |                       |                                                                            |          |

1 Dissemination policy: [#31c](#) Plans, if any, for granting public access to the full 46  
 2 reproducible protocol, participant-level dataset, and statistical  
 3 research code  
 4  
 5

## 6 Appendices

8  
 9 Informed consent [#32](#) Model consent form and other related N/A can  
 10 materials documentation given to participants and authorised be sent  
 11 surrogates on  
 12 request  
 13  
 14

15  
 16 Biological specimens [#33](#) Plans for collection, laboratory evaluation, and N/A  
 17 storage of biological specimens for genetic or Separat  
 18 molecular analysis in the current trial and for future e  
 19 use in ancillary studies, if applicable Laborat  
 20 ory  
 21 manual  
 22 can be  
 23 sent on  
 24 request  
 25  
 26  
 27  
 28  
 29  
 30

### 31 Notes:

- 32
- 33 • 4: N/A, In current publication
- 34
- 35 • 5c: N/A, In current publication
- 36
- 37
- 38 • 15: N/A, ongoing pandemic
- 39
- 40 • 17a: N/A, open label
- 41
- 42 • 17b: N/A, open label
- 43
- 44 • 28: N/A included in current publication
- 45
- 46 • 32: N/A can be sent on request
- 47
- 48 • 33: N/A Separate Laboratory manual can be sent on request
- 49
- 50
- 51
- 52 • The SPIRIT checklist is distributed under the terms of the Creative Commons Attribution License
- 53 CC-BY-ND 3.0. This checklist was completed on 26. October 2020 using
- 54 <https://www.goodreports.org/>, a tool made by the [EQUATOR Network](#) in collaboration with
- 55 [Penelope.ai](#)
- 56
- 57
- 58
- 59
- 60
